# Supplementary material for: Sensitive universal detection of blood parasites by selective pathogen-DNA enrichment and deep amplicon sequencing
Source: PubMed Central journal article supplement (PMC7778815; doi:10.1186/s40168-020-00939-1), 2021-01-02
Supplement: 40168_2020_939_MOESM1_ESM.pdf [file 40168_2020_939_MOESM1_ESM.pdf]

## **Supplementary File S1. Technical notes for manuscript:**

### **Sensitive universal detection of blood parasites by selective pathogen-DNA enrichment and deep amplicon sequencing**

Briana R. Flaherty<sup>†1,2</sup>, Joel Barratt<sup>†1,2\*</sup>, Meredith Lane<sup>1,3</sup>, Eldin Talundzic<sup>4</sup>, Richard S. Bradbury<sup>1,5</sup>

<sup>1</sup>Parasitic Diseases Branch, Division of Parasitic Diseases and Malaria, Center for Global Health, Centers for Disease Control and Prevention, Atlanta, GA, USA.

<sup>2</sup>Oak Ridge Institute for Science and Education, Oak ridge, TN, USA.

<sup>3</sup>Synergy America Inc.

<sup>4</sup>Malaria Branch, Division of Parasitic Diseases and Malaria, Center for Global Health, Centers for Disease Control and Prevention, Atlanta, GA, USA.

<sup>5</sup>School of Health and Life Sciences, Federation University, Australia

#### **\*Corresponding authors**

[nsk9@cdc.gov](mailto:nsk9@cdc.gov), [jbarratt@cdc.gov](mailto:jbarratt@cdc.gov)

[r.bradbury@federation.edu.au](mailto:r.bradbury@federation.edu.au)

<sup>†</sup>Authors contributed equally

**This document provides additional detail on the experiments performed to optimize our universal parasite diagnostic (UPDx) assay.**

## **Additional notes on UPDx optimization**

### *Digestion of neat DNA versus normalized DNA and exclusion of DNA cleanup following digestion*

To reduce time and labor requirements, the present UPDx method was optimized for minimal host-derived read recovery and to maximize parasite read recovery. The method described by Flaherty and colleagues involved subjecting a normalized mass of DNA to enzyme digestion (150 ng), followed by a DNA cleanup step that removed restriction enzymes and buffers prior to PCR (Flaherty et al. 2018). While the 150 ng digest was performed for the sake of consistency across samples, it added an additional laborious step. Here, we subjected neat DNA extracts to restriction digestion and did not perform a DNA cleanup step after D1 and/or D2, removing multiple extraneous steps. Exclusion of these steps sometimes enhanced parasite DNA detection, as a loss of DNA during the additional cleanup was avoided; we tested the impact of these alterations on blood containing *P. knowlesi* and *L. infantum*, confirming that these extraneous cleanup procedures resulted in a loss of performance. The number of *P. knowlesi* reads recovered increased when neat DNA vs quantified and diluted DNA (to 150 ng) was tested, though results obtained for *L. infantum* showed little difference. Similarly, cleanup of DNA following restriction digestion and before PCR1 greatly reduced the subsequent number of *P. knowlesi* reads recovered following NGS, but this made little difference for *L. infantum* (Figure S1 - below).

### *Digestion of DNA extracts in CutSmart Buffer versus water*

As part of our assay optimization procedures, the impact of digesting DNA in commercially available CutSmart Buffer (NEB) versus water was also assessed using blood specimens containing *P. knowlesi* and *L. infantum* extracted into Buffer EB. The addition of CutSmart buffer at 1x concentration to the DNA eluate approximately doubled the resultant

number of *P. knowlesi* reads and led to an almost 20 times increase in total *L. infantum* reads, confirming that utilization of CutSmart Buffer, or an equivalent buffer, during restriction enzyme digestion is essential (Figure S1 - below).

*The impact of cycle number for PCR1 and length of restriction digest times (D1 and D2)*

We observed the recovery of substantially more parasite-specific reads for samples that underwent nested PCR amplification with 15 cycles compared to 10 cycles for PCR1, and when both DNA Digest 1 and DNA Digest 2 (double digestions) were performed, compared to only one of these digestion steps (Figure S1 - below). Restriction digestions were optimized by comparing different digestion times (15 minutes, 1 hour, 2 hours, overnight, or not at all) for both digests (D1 and D2). Restriction digest duration generally had a minor impact beyond 15 minutes. Consequently, the optimal protocol requires Digest 1 for 15 minutes, running PCR1 for 15 cycles, and performing Digest 2 for two hours; though this digest time may be shortened slightly without a major loss of performance.

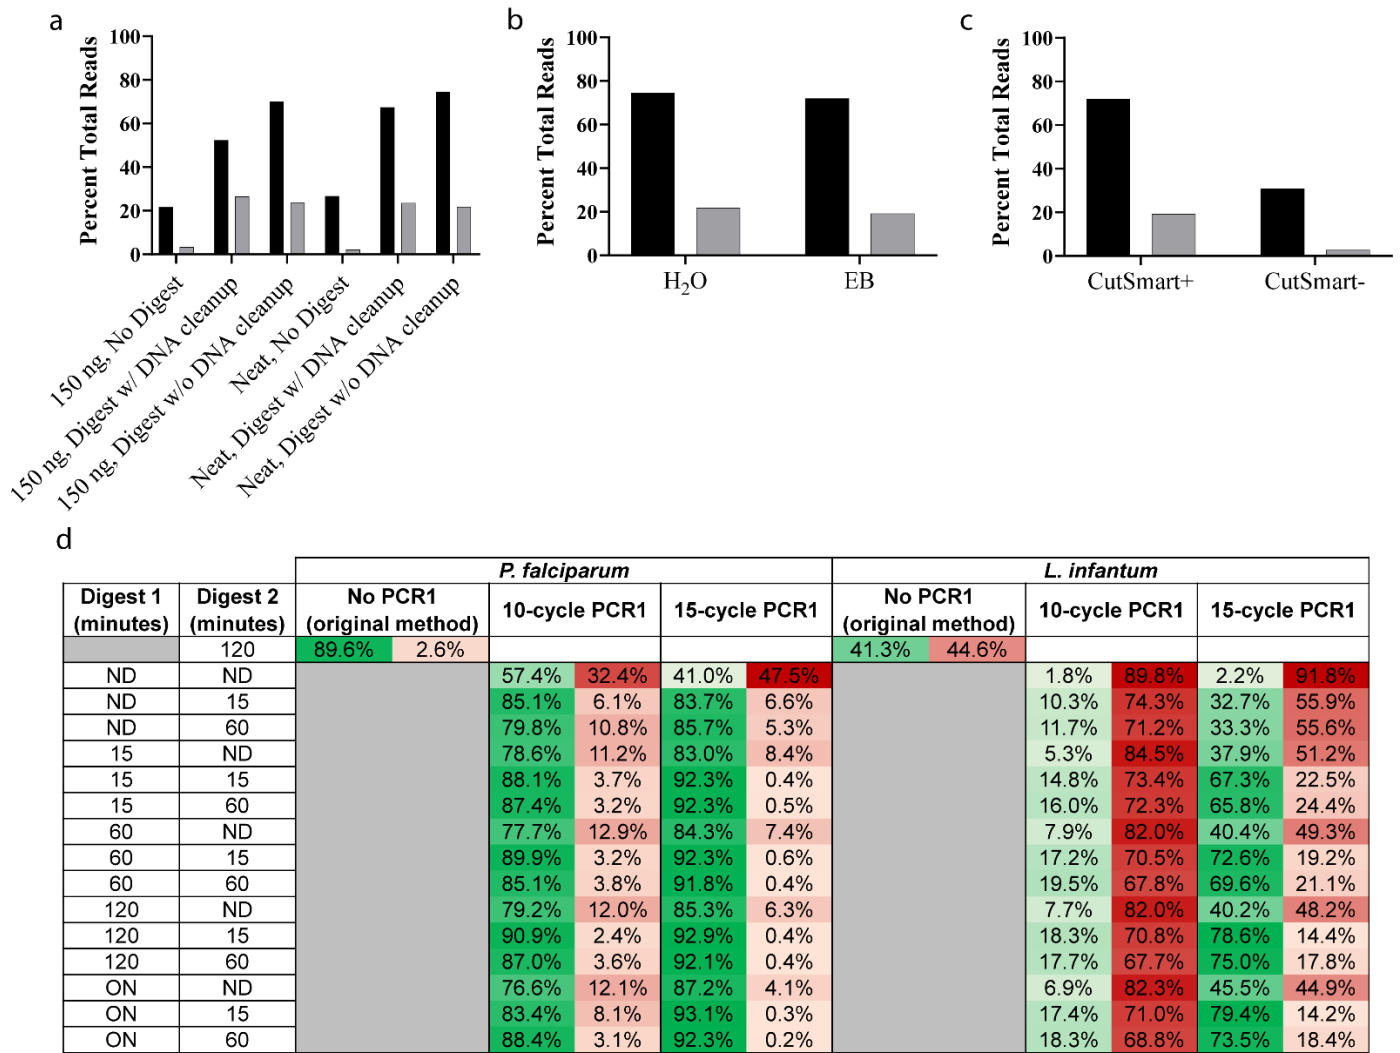

**Figure S1. Overview of optimization experiments performed for our UPDx assay**

(a) 150 ng or 25  $\mu$ L of neat *P. knowlesi* (black bars) and *L. infantum* (grey bars) DNA extracts in molecular grade water were digested with 10 units of BamHI-HF and BsoBI in 1X CutSmart Buffer for 2 hours. Samples were transferred directly to PCR2 or cleaned before PCR2 amplification and DNA sequencing. No notable difference between 150 ng and neat digestion was observed; DNA cleanup had negative or minimal effects on the final proportion of parasite-derived reads recovered in the sample. (b) 25  $\mu$ L of neat *P. knowlesi* (black bars) and *L. infantum* (grey bars) DNA extracts eluted into molecular grade water (H<sub>2</sub>O) or elution buffer (EB) were digested with 10 units of BamHI-HF and BsoBI in 1X CutSmart Buffer for 2 hours and transferred directly to PCR2 for amplification and sequencing. No notable difference was observed between samples eluted into water versus elution buffer. (c) 25  $\mu$ L of neat *P. knowlesi* (black bars) or *L. infantum* (grey bars) DNA extracts in elution buffer were digested with 10 units of BamHI-HF and BsoBI in the presence or absence of 1X CutSmart Buffer for 2 hours and transferred to PCR2 for amplification and sequencing. Substantially higher parasite-specific reads, indicating more efficient digestion of host DNA, were observed for sample digested in the presence of CutSmart buffer. (d) DNA extracts of neat *P. falciparum* or *L. infantum* in elution buffer were processed by the original method or one of a variety of conditions including (a) digestion with 10 units PstI-HF for 0, 15, 60, 120 minutes, or overnight (b) PCR1 for 10 or 15 cycles, and (c) digestion with 10 units BamHI-HF and BsoBI for 0, 15, or 60 minutes. Samples were then amplified by PCR2 and sequenced. Optimal results were achieved with 15-cycle PCR1 and any combination of pre-PCR1 (Digest 1) and pre-PCR2 (Digest 2) digestion (n = 1, ND = no digest).

**Table S1. Preparation of simulated mixed blood parasite infections**

| Sample Name | Spiked Analytes      | DNA extract of specimen from Table 1* | Volumes of DNA extract mixed | Total volume of final simulated mixture |
|-------------|----------------------|---------------------------------------|------------------------------|-----------------------------------------|
| Mix 1       | <i>P. falciparum</i> | Specimen 1                            | 4 $\mu$ L                    | 8 $\mu$ L                               |
|             | <i>P. vivax</i>      | Specimen 2                            | 4 $\mu$ L                    |                                         |
| Mix 2       | <i>P. ovale</i>      | Specimen 3                            | 4 $\mu$ L                    | 8 $\mu$ L                               |
|             | <i>P. falciparum</i> | Specimen 1                            | 4 $\mu$ L                    |                                         |
| Mix 3       | <i>P. falciparum</i> | Specimen 1                            | 4 $\mu$ L                    | 8 $\mu$ L                               |
|             | <i>P. malariae</i>   | Specimen 4                            | 4 $\mu$ L                    |                                         |
| Mix 4       | <i>P. falciparum</i> | Specimen 1                            | 4 $\mu$ L                    | 8 $\mu$ L                               |
|             | <i>P. knowlesi</i>   | Specimen 5                            | 4 $\mu$ L                    |                                         |
| Mix 5       | <i>P. falciparum</i> | Specimen 1                            | 2.2 $\mu$ L                  | 8 $\mu$ L                               |
|             | <i>P. vivax</i>      | Specimen 2                            | 2.2 $\mu$ L                  |                                         |
|             | <i>P. ovale</i>      | Specimen 3                            | 2.2 $\mu$ L                  |                                         |
|             | <i>P. malariae</i>   | Specimen 4                            | 2.2 $\mu$ L                  |                                         |
|             | <i>P. knowlesi</i>   | Specimen 5                            | 2.2 $\mu$ L                  |                                         |
| Mix 6       | <i>P. falciparum</i> | Specimen 1                            | 4 $\mu$ L                    | 8 $\mu$ L                               |
|             | <i>T. cruzi</i>      | Specimen 10                           | 4 $\mu$ L                    |                                         |
| Mix 7       | <i>P. vivax</i>      | Specimen 2                            | 4 $\mu$ L                    | 8 $\mu$ L                               |
|             | <i>T. cruzi</i>      | Specimen 10                           | 4 $\mu$ L                    |                                         |
| Mix 8       | <i>P. falciparum</i> | Specimen 1                            | 4 $\mu$ L                    | 8 $\mu$ L                               |
|             | <i>T. brucei</i>     | Specimen 13                           | 4 $\mu$ L                    |                                         |
| Mix 9       | <i>P. falciparum</i> | Specimen 1                            | 4 $\mu$ L                    | 8 $\mu$ L                               |
|             | <i>L. loa</i>        | Specimen 17                           | 4 $\mu$ L                    |                                         |
| Mix 10      | <i>P. falciparum</i> | Specimen 1                            | 4 $\mu$ L                    | 8 $\mu$ L                               |
|             | <i>B. malayi</i>     | Specimen 16                           | 4 $\mu$ L                    |                                         |

To produce these simulated mixed infections, DNA extracts from various specimens listed in Table 1 from the main manuscript text\* were mixed as described in this table. Prior to testing with UPDx, 3  $\mu$ L of Qiagen elution buffer was added to all 8  $\mu$ L of these mixtures (mixes 1 to 10) to bring the final volume to 11  $\mu$ L. This addition of elution buffer was performed to add extra volume to these mixes (while conserving the original extracts), allowing for sample loss due to evaporation during storage, and to bring the volume of the mix above 8.5  $\mu$ L. When required for UPDx testing, 8.5  $\mu$ L of these DNA solutions was processed according to the methods described in the main manuscript text.

## Appendix A. Fasta sequences that were aligned to facilitate the design of our ‘outer’ nested

### primers

>HUMRGE - Human 18S rRNA gene, complete

```
CCGTCCGTCCGTCGTCCTCGCTTGCAGGGCGCCGGCCCGTCCTCGAGCCCCNNNNNCCGTCGGCCCGCTCGGGG
CCTCGCCGCGCTCTACCTACCTACCTGGTTGATCCTGCCAGTAGCATATGCTTGTCTCAAAGATTAAGCCATGCATGTCT
AAGTACGCACGGCCGGTACAGTGAACCTGCGAATGGCTCATTAAATCAGTTATGGTTCTTTTGGTCGCTCGCTCCTCTCC
TACTTGGATAACTGTGGTAATTTAGAGCTAATACATGCCAGGGCGCTGACCCCTTCGCGGGGGGGATGCGTGCATT
TATCAGATCAAACCAACCCGGTCAGCCCTCTCCGGCCCGGGGGGGGGCCCGGGCGGCTTTGGTACTCTAGA
TAACCTCGGGCCGATCGCACGCCCCCGTGGCGGGGACGACCCATTGCAACGCTGTGCCCTATCACTTTCGATGGTAGTC
GCCGTGCCCTACCATGGTACCACGGGTGACGGGGAATCAGGGTTCGATTCGCGAGAGGGAGCCTGAGAAACGGCTACCAC
ATCCAAGGAAGGCAGCAGGGCGCAAATACCCACTCCGACCCGGGAGGTAGTGACGAAAAATAACAATACAGGACTC
TTTCGAGGCCCTGAATTTGGAATGAGTCCACTTTAAATCCCTTTAACGAGGATCCATTGGAGGGCAAGTCTGGTGCCAGCA
GCCGCGGTAATTCAGCTCCAATAGCGTATATTAAGTGTGCTGCAAGTAAAAAGCTCGTAGTTGGATCTTGGGAGCGGGC
GGGCGGTCCGCGCGAGGGCAGCCACCCCGCTCCCGCCCTTCGCTCTCGGCGCCCTCGATGCTCTTAGCTGAGTG
TCCGCGGGCCCGAAGCGTTTACTTTGAAAAATTAGAGTGTCAAAGCAGGCCGAGCCGCTGGATACCCGAGCTAG
GAATAATGGAATAGGACCGGGTCTATTTTGGTGGTTTTCGGAAGTGGCCATGATTAAGAGGGACGGCCGGGGGCAT
TCGTATTGCGCCCTAGAGGTGAATTTCTGGACCGGCGCAAGACGGACAGAGCGAAAGCATTTGCCAAGAATGTTTTC
ATTAATCAAGAAGCAAGTTCGGAGGTTTCAAGACGATCAGATACCGTCTGATTTCCGACCATAAACGATGCCAGCCGGC
ATCCGGCCGCGTATTCCCATGCCCGGGCAGTTTCCGGAACCAAAAGTCTTTGGGTTCCGGGGGGAGTATGGTTG
CAAAGCTGAAACTTAAAGGAATGACGGAAGGGCACCACAGGAGTGGAGCCTGCGGCTTAATTTGACTCAACACGGGAA
ACCTCACCCGGCCGGACAGGACAGGATGACAGATTGATAGCTCTTCTCGATTCCGTGGTGGTGGTGCATGGCCGT
TCTTAGTTGGTGGAGCGATTTGTCTGGTAAATCCGATAACGAACGAGACTCTGGCATGCTAACTAGTTACCGGACCCCC
GAGCGGTCCGCGTCCCCCAACTTCTTAGAGGGACAAGTGGCGTTCAGCCACCCGAGATGAGCAATAACAGGCTGTGAT
GCCCTTAGATGTCCGGGCTGCACGGCGCTACACTGACTGGCTCAGCGTGTGCCCTACCTACCGCGGACGGCGGGTA
ACCCGTTGAACCCATTCTGTGATGGGGATCGGGGATTCGAATTTCCCCATGAACGAGGAAATCCAGTAAGTCCGGGT
CATAAGCTTTCGTTGATTAAGTCCCTGCCCTTTGTACACACCCCGTTCGCTACTACCATTGGATGGTTTAGTGAGGCC
CTCGGATCGGCCCCCGGGGTCGGCCACGGCTGGCGGAGCGCTGAGAAGACGGTCAAGCTTGACTATCTAGAGGAAG
TAAAAGTCGTAACAAGGTTTCCGTAGGTGAACCTGCGGAAGGATCATTA
```

>AJ439713 - Babesia divergens 18S rRNA gene

```
AACCTGGTTGATCTGCCAGTAGTCATATGCTTAAAGATTAAGCCATGCATGTCTAAGTACAACTTTTTACGGT
GAAACTGCGAATGGCTCATTACAAAGTTATAGTTTCTTTGGTATTTCGTTTTCCATGGATAACCGTGCTAATTTAGGGC
TAATACAAGTTCGAGGCCTTTTGGCGGGTATATAGTTCTAAACCATCCCTTTTGGTTTTCCGGTGAATCATAATAAC
TTGCGAATCGCAATTTTTGCGATGGACCCTCAAGTTTCTGACCCATCAGCTTGACGGTAGGGTATTGGCCCTACCGAGG
CAGCAACGGGTAACGGGAATTAGGGTTCGATTCGGGAGAGGAGCCTGAGAAACGGCTACCACATCCAAGGAAGGCAGC
AGGCGCGCAAATTACCAATCTGCACAGGGAGGTAGTGACAAGAAATAACAATACAGGGCAATTTGCTTTGTAATTGGA
ATGATGGTGACCTAAACCTCACAGAGTAACAATGGAGGGCAAGTCTGGTCCAGCAGCCGCGGTAATTCAGCTCCA
ATAGCGTATATTAACCTTGTTCAGTTAAAAAGCTCGTAGTTGAATTTTTGCGTGGTGTAAATATTGACTGATGTGAGA
TTCGACTTCTTTTTGGGATTTATCCCTTTTTACTTTGATAAAAATTAGAGTGTTCAGCAGACTTTTTGCTTTGAATACT
TCAGCATGGAATAATAGAGTAGGACTTTGGTTCATTTTTGTTGGTTTGTGAACCTTAGTAATGGTTAATAGGAACGGTTG
GGGCATTCGTATTTAATCTGTCAGAGGTGAAATTTCTTAGATTTGTTAAAGACGAACTACTGCGAAAGCATTTGCCAAGGA
CGTTTTCTAATTAACAAGAACGAAAGTTAGGGATCGAAGACGATCAGATTCCGTCGTAGTCTTAACCTAATAACTATGCCG
ACTAAGGATTTGAGGTCGTATTTTTCGACTCCTTACGACCTCGAGAGAAATCAAAGTCTTTGGGTTCTGGGGGGAGT
ATGGTCGCAAGGCCGGAACCTTAAAGGAATTGACGGAAGGGCACCACAGGCGTGGAGCCTGCGGCTTAATTTGACTCAAC
CGGGGAAACTCACAGGTCCAGACAATGTTAGGATGACAGATTGATAGCTCTTCTTGATTTCTTTGGTGGTGGTGCAT
TGGCCCTTCTAGTTGGTGGATGATTTGTCTGGTAAATTCGTTAACGAACGAGACCTTAACCTGCTAAGTGTCCG
TAAAAAGTTTCGTCGTTACGGTTTGTCTTTAGAGGACTTTTGGCGCTTAAGCCGCAAGGAAATTTAAGGCAATAACA
GGTCTGTGATGCCCTTAGATGTCTGGGCTGCACGGCGCTACACTGATGCATTCATCGAGTTTATCCCTTCCCGAAG
GGTGGGTAATCTTTAGTATGCATCGTACGGGGATTGATTTTTGCAATTTCTAAATCATGAACGAGGAATGCCTAGTATG
CGAAGTCAATCAGCTTGTGCAGATTACGTCCCTGCCCTTTGTACACACCCCGGTTGCTCCTACCAGTGCAGTATCGGG
TGAATTATTCGGACCGTGGCCTTTCCGATTCGTGCGTTTGGCTAGGGAAGTCTTGTGAACCTTATCACTTAGAGGAAG
AGAAGTCGTAACAAGGTTTCCGTAGGTGAACCTGCAGAAGGATCAAGC
```

>HQ289870 - Babesia duncani isolate BAB1615 18S ribosomal RNA gene, complete sequence

```
AACCTGGTTGATCTGCCAGTAGTCATATGCTTAAAGATTAAGCCATGCATGTCTAAGTATAAACTTTTATATGG
TGAACCTGCGAATGGCTCATTACAACAGTTATAGTTTATTTGAAAGTCGTTTTTACATGGATAACCGTGCTAATTTAGG
GCTAATACATGCTCGAGGCCCTGGCTTCTGCTTTGGCTGCGTTTATTAGACTCGAAACCTTCCCGCTTGGCGTACTCGGT
GATTCATAATAAATTTCCGAATCGCATGGCTTTTCCGGCGATGGTTTCATTCAAGTTTCTGACCTATCAGCTTTGGACGG
TAGGGTATTGGGCTACCGGGCAGCAGGGTAAACGGGAATAGGGTTCGATTCGAGAGAGGAGCCTGAGAAACGGCT
ACCACATCTAAGGAAGGCAGCAGGGCGCAAATTACCAATACGGACCCGTGAGGTAGTGACAAGAAATAACAATACAG
GGCTTAAAGCTTTGTAATTTGGAATGATGGGAATCCAAACCCCTTCAGAGTATCAATTTGGAGGGCAAGTCTGGTGCCAGC
AGCCGCGGTAATTCAGCTCCAATAGCGTATATTAACCTTGTTCAGTTAAAAAGCTCGTAGTTGAACCTTCTGCCCTTG
GCCTTCGTTCCCTTTGGGTTTTCGCTTGGTGGCTTACCTTGGCGGTTGGTCTCCATTTGCAAGTTTACTTTAG
AAAATTAGAGTGTTCAGCAGGCTTTTGCCTTGAATACTTACGATGGAATAATAAAGTAGGACTTTGGTTCATTTTTG
TTGGTTTTCAGGACCAAAGTAAATGGTTAATAGGAACAGTTGGGGCATTCGATTTAACTGTCAGAGGTGAAATTTCTTAGA
TTTGTAAAGACGAATCTGCAAGACATTTGCCAAGGATGTTTTCTAATTAATCAAGAACGAAAGTTAGGGGCTCGAAGA
CGATCAGATACCGTCTGATCCCTAACTATAAACTATGCCGACTAGAGATTGGAGGTCGTCAATTTTAAACGACTCCTCAG
CACCTTGAGAGAATCAAAGTCTTTGGGTTCTGGGGGAGTATGGTCGAAGGCTGAACCTTAAAGGAATTCAGCGAAGG
GCACCACAGGCTGGAGCCTGCGGCTTAATTTGACTCAACACGGGGAACCTCACAGGTCCAGACATAGTTAGGATTGA
```

CAGATTGATAGCTCTTTCTTGATTCTATGGGTAGTGGTGCATGGCCGTTCTTAGTTGGTGGAGTGATTGTCTGGTTAAT  
TCCGTTAACGAACGAGACCTTAACCTGCTAAATAGCAGCTGAGAATAATCTCTTGTTCAGTTTGTCTTCTAGAGGGAC  
TTTGGCGTATAAATCGCAAGGAAGTTTAAAGGCAATAACAGGTTGTGTATGCCCTTAGATGTCTGGGCTGCACGCGGC  
TACACTGATGCATTTCATCGAGTTTATCCTTGCCCGAAAGGGTTTGGTAATCTTATAGTATGCATCGTGATGGGGATTGAT  
TATTTGCAATTATTAATCATGAACGAGGAATGCCTAGTAGGCGCGAGTATCAGCTCGTGCCGACTACGTCCCTGCCCTTT  
GTACACACCGCCCGTCCGCTCCTACCGATCGAGTGATCCGGTGAATTATTCGGACCGTGACGCTTCTAATTTCGTTAGAAAT  
GTCTAGGGAAGTTTTGTGAACCTTATCACTTAAAGGAAGGAGAAGTCGTAACAAGGTTTCCGTAGGTGAACCTGCGGAAG  
GATCATT

>XR\_001160982 - Babesia microti strain RI 18S ribosomal RNA rRNA

AACCUGGUUAUCCUGCCAGUAGUCAUAUGCUUUGUUUAAGAAUUAAGCAUGCAUGCUUAGUAUAAGCUUUUAUACAG  
CGAAACUGCGAAUUGGCUCAUUAAAACAGUUUAUAGUUUAUUUUGAUUUCGUUUUACAUGGAUAACCGUGGUAAUUCUAGGG  
CUAAUACAUGCUCGAGGCGGUUUUUCGCGUGGCGUUUAUAGACUUUAACCAACCCUUCGGGUAAUCGGUGAUUCAUAAU  
AAAUUAGCGAAUCGCAUGGCUUUGCCGCGAUGUAUCAUUAAGUUUCUGACCUAUCAGCUUUGGACCGUAGGUUUUGG  
CCUACCGGGGCGACGACGGGUGACGGGAAUUGGGGUUCGAUUCGCGAGGGGAGCCUGAGAAACGGCUACCAUUAUUA  
GGAAGCGAGCGAGCGCGCAAAUUAACCAUUCUGACACAGGGAGUAGUGACAAGAAUUAACAUAACAGGCUAAUUAAGUC  
UUGUAUUUGGAAUGAUGGAAUCUAAACCCUUCAGAGUAUCAUUAUGGAGGGCAAGUCUGGUCGAGCCGCGGUA  
UUCAGCUCAUUAUGCGUAUUAUAAAGUUGUUGCAGUUUAAGAAUCUGUAGUUUAUUCUGCUUUGUUAUUAUUCGCG  
UUCGCGGCUUUUUUAUUGACUUGGCAUCUUCUGAUUUGGUCUUCGCGUACUUAUUUCAGGAUUUUAUUCUUGAGAA  
AACUAGAGUUUUCAAACAGGCAUUCGCUUGAAUUAUCAUGCAUGGAAUUAUGAAGUAGGACUUGUUCUUAUUUGUU  
GGUUUAUUGAGCCAGAGUAUAGGUUAUUAAGGAGCAGUUGGGGCAUUCGUUUUAUUAACUGUCAGAGGUGAAUUCUAGAU  
UGUUAAAGACGAACUACUGCGAAAGCAUUGCCAAAGGAUGUUUAUUAUUAACAAGAAAGUUAUGGGGAUCGAAAGACG  
AUCAGAUACCGUGUAGUCUUAACCAUUAACUUAUGCCGACAGAGAUUUGGAGUUCGUUUUAUUAACAGUUCUUCGAGCA  
CCUUGAGAGAAUCAAAGUCUUGGGUUCUGGGGGAGUUAUGGUCGCAAGUCUGAAACUUAAGGAAUUGACGGAAGGGC  
ACCACCGCGUGGAGCCUGCGCUUUAUUGACUCAACACGCGAAACCUACACAGGUCCAGACAUAGAGAGGAUUGACA  
GAUUGAUAGCUCUUCUUAUUAUGGUGGUGGUGCAUUGGCGUUCUUAUGUUGGAGUGAUUUGUCUGGUUUUAUUC  
CGUUUAACCAAGCAGAGCUCUUAACCGCUAAAUUAAGAAUCUGGCAAGCUUUGUCUUAUCAGUUCGUUUUAUUGAGGAC  
UUUGCGUUAUUAACCGCAAGGAAGUGUAAGGCAUUAACAGGUCUGUAGUCCUUAUGUUCUGGCGUCACGCGCGC  
UACACUGAUGCAUUAACGAGUUUUUCUUGGCGUCGCGGUAUCUUAACAGUAGUACUGGAGUUGGGAUAGAU  
UAUUGCAAUUAUUAUCUUAACGAGGAUUGCCUAGUAGGCGCGAGUCAUCAGCUCUGGCGACUACGUCCUUCGCCUUU  
GUACACCGCCCGUCGCUUUAACCGAUCGAGUGAUCGCGGUAUUAUUCGGACCAAGAAACGUGGAUUCGUUCUUCUUCU  
UUUUGAAAGUUUUGUGAACC UUACUUAUUAAGGAAGGAGAUGCUUAACAAGGUUUCGUAGGUGAACCUGCGGAAGG  
A

>AY048113 - Babesia sp. M01 18S ribosomal RNA gene, complete sequence

AACCTGGTTGATCCTGCCAGTAGTCATATGCTTGTCTTAAAGATTAAGCCATGCATGTCTAAGTACAAACTTTTTACGGT  
GAAACTGCGAATGGCTCATTACAACAGTTATAGTTTCTTTGGTATTCTGTTTCCATGGATAACCGTGCTAATTTAGGGC  
TAATACAAGTTTCGAGGCTTTTTGGCGCGTTTTATTAGTTCTAAACCAATCCCTTTTGGTTTTTCGGTGTATTCATAATAAC  
TTGCGAATCGCAATTTTTCGATGGACATTCAGTTCTGACCCATCAGCTTGACGGTATGGCTTACCGGCTACCGGAGG  
CAGCAACGGGTAAACGGGAATTAGGTTTCCGGAGGGAGCCTGAGAAACGGTACCACATCCAAGGAAGGCGAGC  
AGGCGCGCAATTAACCAATCCTGACACAGGGAGGTAGTGACAAGAAATAACAATACAGGGCAATTTGTCTTGAATTGGA  
ATGATGGTGACCTAAACCTCACCAGAGTAACAATTTGGAGGGCAAGTCTGGTGCCAGCAGCCGCGTAATTCAGCTCCA  
ATAGCTATATAAATCAAGAACGAAAGTTAGGGGATCGAAGACGATCAGATAACCGTCTGATGCTTAACTAAACATATGCGG  
TTGCACTTCGCTTTTGGGATTTATCCCTTTTTACTTTGAGAAAATTAGAGTGTTCACAGCAGACTTTTGTCTTGAATACT  
TCAGCATGGAATAATAGAGTAGGACTTTGGTTCTATTTTGTGGTGGTGTGAACCTTAGTAATGGTAAATAGGAACGGTTG  
GGGGCATTCGTATTTAACAGTCAGAGGTGAAATTTCTAGATTTGTAAAGACGAACTACTGCGAAAGCATTGCGCAAGGA  
CGTTTTCTAATAAACAAGAACGAAAGTTAGGGGATCGAAGACGATCAGATAACCGTCTGATGCTTAACTAAACATATGCGG  
ACTAGGGATTGGAGGTCGTATTTTCCGACTCCTTACGACCTTGAGAGAAATCAAAGTCTTTGGGTTCTGGGGGAGT  
ATGGTCGAAGGCTGAACTTAAAGGAATTGACGGAAGGGCACCACCAGGCGTGGAGCCTGCGGCTTAAATTTGACTCAC  
ACGGGAAACTCACCAGTCCAGACAATGTAGGATTGACAGATTGATAGCTCTTCTTGATTCTTTGGGTTGGTGGTGC  
TGCCGTTCTTAGTTGGTGGGATTTGTCTGTTAATTTCCGTTAACGAAACGAGACTTAACTGCTAACCTAGTGTCCG  
TAAAAGGTTCTGCTCGTTACGGTTTGTCTTCTTAGAGGACTTTGCGGCTTAAGCCGCAAGGAAGTTTAAAGCAATAACA  
GGTCTGTGATGCCCTTAGATGCTTGGCTGACGCGCGCTACTGATGCATTCATCGAGTTTATCCCTTCCCGAAAG  
GGCTGGGTAATCTTTAGTATGCATCGTGACGGGATTTGATTTTGCATTTCTAATCATGAACGAGGAATGCCTAGTATG  
CGCAAGTCATCAGCTTTGTGCAGATTACGTCCTGCCCCCTTTGTACACACCGCCGTCGCTACCGATCGAGTGATGCGG  
TGAATTAATTCGGACCGTGGCCTTCCGATTCTGTCGGTTTGGCTAGGGAAGTCTTGTGAACCTTATCACTTAAAGGAAG  
AGAAGTCGTAACAAGGTTTCCGTAGGTGAACCTGCAGAAGGATCAAGC

>AF036588 - Brugia malayi small subunit ribosomal RNA gene, partial sequence

AAAGATTAAGCCATGCATGTCTAAGTTCAAATAAACCTATAATGGTGAACCGCGAACGGCTCATTATAACAGCTATAAT  
GTACTTGATGTTGATTATCTAAGCTGGATAACTGTGGCAATTTAGAGCTAATACATGCACCAAGGCTCCGAATTTTAAA  
CGAGCGCATCTATTAGATTAACAACCAATCGGATTTAATTTTAAATCCGTTAATTTGGTACTCTGAATAGCTATGGCTGA  
TCGCATGGTCTTGTACCGCGCAGTATCTATCAAGTGTCTGCTTATCAACTTTCGATGGTAGTTTATGTGCTTACCATG  
GTTGTAACGGGTAACGGAGAATAAGGGTTCGACTCCGGAGAGGGAGCCTGAGAAACGGCTACCACATCCAAGGAAGGCAG  
CAGGCGCGCAAAATTAACCACTCTCAGAAATGAGGAGGTAGTGACGAAAAATAACGAGACCGTTCTTTTGRGGCCGGTAT  
CGGAATGGGTACAATTTAAACCTGTTAACGAGGATCTATGACAGGGCAAGTCTGGTGCAGCAGCCGCGGTAATTCAGC  
TCTCAAAGTGATATCGTCAATGCTCGGTTAAAAGCTCTGATGTTGGATCTGCGTCTCAGGACTTGGTCCATCCATCGG  
ATGAGAACTAGGCTCCTAGGCTAATATTGCCAGTTTTTCCATACGTTACCTTAATTTGGTGTGCATATGGTGGCTAGCAAGT  
TTACCTTGAAAAAATTAGAGTGTCAATGCGGGCTAATGCCTGAATACCTCGTGCATGGAATAATGAAATAGGATCTCCGT  
TCTATTTTGTGGTCTTCTGATCTGAGATAATGGTAAAGAGGGACGGACGGGGCATTCGATCGTCTGCTGAGAGGTGA  
AATTTTGGACCGTAGCAGACTACGACTGCGAAAGCTTGGCCAAAGATGTTCTCATTAATCAAGAACGAAAGTCAAG  
GGTTCGAAGGCGATCAGATACCGCCCTAGTCTGACCGTAAACGATACCAACTAGCGTTCCGTGCGCGGTAATACGCTT  
TGACGGGACGCTTCCCGAAACGAAAGTTTTTCCGTTCCGGGGGAAAGTATGGTTGCAAGCTGAAACTTAAAGAAATGGA  
CGGAAGGGCACCCAGGAGTGGAGCTGCGGCTTAATTTGACTCAACACGGGAAACTCACCTGGCCCGGACACCGTGA  
GGATTTGACAGATTGAGACTCTTTTCATGATTCGGTGGTGGTGGTGCATGGCGGTTCTTAGTTGGTGGAGTGATTTGTCT  
GGTTTATTCGGATAACGAGCGAGACTCTAGCCTACTAAATAGTTACTGGATAATTTATCTGCTCAGACAACTTCTTAGAG





ATGAGTTGTCTCTATACTCTATA  
>X07773 - Leishmania donovani gene for ribosomal RNA small subunit  
GATCTGGTTGATTCGCCAGTAGTCATATGCTTGTTCCTCAAGGACTTAGCCATGCATGCCTCAGAATCACTGCATTTGCAG  
GAATCTGCGCATGGCTCATTACATCAGACGTAATCTGCGCAAAAATCTGCGGTTTCCGCAAAAATGGATAACTTGGCG  
AAACGCCAAGCTAATACATGAACCAACCGGGTGTCTCCACTCCAGACGGTGGCAACCATCGTCGTGAGACGCCAGCG  
AATGAATGACAGTAAAACCAATGCCTTCACTGGCAGTAACACCAGCAGTGTGACTCAATTCATTCCTGCGAAAGCCG  
GCTTGTTCGGCGTCTTTGACGAACAACCTGCCATCCATAGCTGGTGTAGTGGACTGCCATGGCGTTGACGG  
GAGCGGGGATTAGGGTTCGATTCGGGAGAGGGAGCCTGAGAAAATAGTACCCTTCTACGGAGGGCAGCAGGCGCGCAA  
ATTGCCCAATGTCAAACAAAACGATGAGGCAGCGAAAAGAAATAGAGTTGTAGTCCATTTGGATTGTCATTTCAATGG  
GGGATATTTAAACCCATCCAATATCGAGTAACAATTTGGAGGACAAGTCTGGTCCAGCACCCGCGGTAATTCAGCTCCA  
AAAGCGTATATTAATGCTGTGCTGTTAAAGGGTTCGTAGTTGAACTGTGGGCTGTGCAGGTTTGTCTCGTCCGCCG  
TCCATGTCCGATTTGGTGAACCCAGGCCCTTGCAGCCGCTGAACATTCAAAGAAAACAAGAACACGGGAGTGGTTCCTTTC  
CTGATTTACGCATGTGCATGCCAGGGGCGTCCGTGATTTTACTGTGACTAAAGAAGCGTGACTAAAGCAGTCA  
TTGACTTGAATTAGAAGCAATGGGATAACAAGGAGCAGCCTTAGGCTACCGTTTTCGGCTTTTGTGGTTTTAAAGGTC  
TATTTGAGATTAATGGAGCTGTGCGACAAGTCTTCCATCCGAACCTCGGTTCCGTTGTGGCGCCTTTGAGGGGTTTA  
GTGCGTCCGGTACGAGCTCCGGTTCGTCCGGCCGTAACGCCTTTTCAACTCACGGCTCTAGGAATGAAGGAGGTAGTT  
CGGGGAGAACGTAAGTGGGGCTCAGAGGTGAAATCTTAGACCGCACCAAGCAGAACTACAGCGAAGGCATTTCTCAAG  
GATACCTTCTCAATCAAGAACAAGTGTGGAGATCGAAGATGATTAGAGACCATTGTAGTCCACACTGCCAAACGATG  
ACACCCATGAATTTGGGGATCTTATGGGCGGCCGCGCGCAGGGTTTACCCTGTGTCCAGCACCGCCGCTTTTACCAA  
CTTACGTATCTTTCTATTCGGCCTTTACCGGCCACCCACGGGAATATCCTCAGCACGTTTCTGTTTTTTCACGCGAAA  
GCTTTGAGGTTACAGTCTCAGGGGGGAGTACGTTCCGAAGAGTGAAACTTAAAGAAAATGACCGAATGGCACCACAAGAC  
GTGGAGCGTGGGTTAATTTGACTCAACACGGGGAACCTTACCAGATCCGGACAGGATGAGGATGACAGATGAGTGT  
TCTTTCTCGATTCCTGAATGGTGGTGCATGGCCGCTTTTGGTCCGTTGGAGTATTGTTGGTTGATTCCGTCACCGGA  
CGAGATCCAAGCTGCCAGTAGAATTCAGAATTCGCCATAGGATAGCAAACTCATCGCGGGTTTACCCAACGGTGGGC  
CGCATTCGGTCAATCTTCTCAGCGGATTCCTTTGTAATGCAACAAGGTGAAATTTTGGGCAACAGCAGGTCTGTGAT  
GCTCTCAATGTTTGGCGCAGCAGCAGTCAATGTCAGTGAACAAGAAAACGACTTTGTGCAAGCTACTTGTGAT  
CAAAAGAGTGGGAAAACCCGGAATCACATAGACTCAGTTGGGACCGAGGATTGCAATATTGGTCCGCAACGAGGAAT  
GTCTCGTAGGCGAGCTCATCAACTGTCCGATACGTCCTGCCATTTGTACACACCGCCGTCGTTGTTCCGATGA  
TGGTGAATACAGGTGATCGGACAGGCGGTGTTTTATCCGCCCAGAAAGTTCACCGATATTTCTCAATAGAGGAAGCAA  
AGTCGTAACAAGGTAGCTGTAGGTGAACCTGCAGCTGGATCATTT  
>PFARGEA - P.falciparum 18S ribosomal RNA in asexual parasites  
AACCTGGTTGATCTGCCAGTAGTCATATGCTTGTCTCAAAGATTAAGCCATGCAAGTGAAAGTATATATATATATTTTATA  
TGTAAGAACTGCGAACGGCTCATTTAAACAGTTATAGTCTACTTGACATTTTATTATAAGGATAACTACGGAAAAGCTG  
TAGCTAATACTTCTTTTATCTCTGATTTTTTATCTTTGGATAAGTATTTGTTAGGCTTAAGAAAAGTATTATA  
CTTAAGGAATTAACAAGAAGTAACACGTAATAATTTATTTATTTAGTGTGATCAATCGAGTTCTTGACCTATCA  
GCTTTTGTGTTAGGGTATTGGCCATAACATGGCTATGACGGGTAAACGGGAAATAGAGTTCGATTCGGAGAGGGAGCCT  
GAGAAATAGCTACCACATCTAAGGAAGCAGCAGGCGCTAATACCCTAATCTAAGAAGAGAGGTAGTGACAAGAAA  
TAACAATGCAAGGCAATTTTGGTTTTGTAATTTGGAATTTGGGAAATTTAAACCTTCCAGAGTAACAATTTGGAGGC  
AAGTCTGTGCCAGCAGCGCGTAATCCAGCTCCAATAGCGTATATAAAATTTGTTGCAGTTAAACAGCTCGTAGTTG  
AATTTCAAAGAATCGATATTTTATTTGTAATCTTAGGGAACTATTTTAGCTTTTGGCTTTAATACGCTTCTCTATTT  
ATTAATTTCTTTAAATAACAAGATTTCTTTAAATCCCACTTTTGTCTTTTGGCTTTTGGGATTTTGTACTTTTGA  
GTAATTTAGAGTGTCAAAGCAAACAGTTAAAGCATTACTGTGTTGAAATCTATAGCATGGAATAACAAAATTTGAACA  
AGCTAAAATTTTTTGTCTTTTTCTTATTTTGGCTTAGTTACGATTAATAGGAGTAGCTTGGGGACATTCGTATTCAGA  
TGTCAGAGGTGAAATTTAGATTTTCTGGAGACGAACAACCTGCGAAAGCATTTGCTTAAATACTTCCATTAATCAAGA  
ACGAAAGTTAAGGGAGTGAAGCGATACAGTACCCTGCTAATCTTAAACATAAATAATGCCCGATAGGTGGATGAA  
GTGTTAAATAAAGTCACTTTTCGAGGTGACTTTTAGATTGCTTCTTCCAGTACCTTATGAGAAATCAAAGCTTTTGG  
GTTCTGGGGCAGTATTCCGCGAAGCGAAGGTTAAAGAAATGACGGAAGGGCACCACAGGCGTGGAGCTTGCAGGCT  
TAATTTGACTCAACACGGGAACTCAGTAGTTAAGCAAGAGTAGGATTGACAGATTAATAGCTCTTTCTTGTATTTCT  
TGGATGGTGAATGCGGTTTTAGTCTGTTGCTGAATATGATGTAATTTGCTGTTAATTCGATAACGAACGAGATCTTA  
GCTAATTAGCGGCGAGTACACTATATTTCTTATTTGAAATTTGAACATAGGTAACATAACATTTATTCAGTAATCAA  
ATTTAGTATTTTATTAATAATCTTTTCCCTGTTCTACTAATAAATTTGTTTTTACTCTATTTCTCTTTTAAAGATG  
TACTTGTGTTGATGAAAAGCTTCTTAGAGGAACATTGTGTGCTAACACAAGGAGTTAAGGCAACAACAGGTCTGTGA  
TGCTTTAGATGAACACTAGCTGCACGCTGCTACACTGATATATAAAGAGTTTAAATAAATAATGCTTATATTTGATC  
TTTGTATGCTTATATTTTGCATATTTTCTCCGCCGAAAGGCGTAGGTAATCTTTATCAATATATATCGTATGGGGATA  
GATTTATTGCAATTTAATCTTTGAACAGGAAATGCCTAGTAAGCATGATTCATCAGATTTGTGTGACTACGTCCTGCC  
TTTGTACACACCGCTCGCTACCGATTTGAAAGATATGATGAATTTGTTGGACAAGAAAATTTGAATTTATTTATTT  
TTTTTTCTGGAATAACCGTAAATCTCTATCTTTTAAAGGAAGGAGAAGTCTGTAACAAGTTTCCGTAGGTGAACCTGCGGA  
AGGATCATTA  
>PFARRSSU - Plasmodium knowlesi small subunit ribosomal RNA sequence  
AACCUUGUUAUCUUGCCAGUAGUCAUUAUGCUUGUCUCAAAGAUUAAGCCAUUGCAAGUAGAAAGUAUUAUGCAUUAUUUAU  
UGUAGAAACUGCGAACGGUCUUAUAAAACAGUUAUAUUCUACUUGACAUUUCUAUUAAGGAUAACUACGGAAAAGCUG  
UAGCUAAUACUUGCUUUAGCACUUCUUGAUUUUCUUGAGUGUGUACUUGUUAAGCCUUUAAGAAAAGAGUUUAUUAAC  
UUAAGGAAUUAUAAAGAAAGUAACACGUAUUGGAUUCUCCAUUUUAGUGUGUAUCAUUCAGUUAUCUGACCUUAUCA  
GUUUUUGAUUUAAGGUAUUGGCUUAACUAGGCUUUAAGCCGUAACGGGAAUUAAGAUUCUCCGAGAGGGAGCCU  
GAGAAUAGCUAACCAUUAAGGAAGGACGAGCGCGUAAAUAACCAUUAUAAAGAAAGAGAGGUAGUGACAAGAAA  
UAACAUAACAAGGCCAUUCUGGCUUUGUAUUGGAUUGGAAUUAUAAAACCUUCCAAAUAUCAAUUGGAGGGCAG  
UCUGGUGCCAGCAGCCGCGUUAUUCAGCUCAUUAAGCGUAUUAUAAAUAUUGUUGCAGUUAUAAAACGCUUGUUGAAU  
UUAUAAAGAAUUCGAUUAUUAAGAACCGCUUUAAGCUUAUAAAUAUUAUUAUUAUUAUUAUUAUUAUUAUUAUUAUUA  
UUUUUAGCUUAUUAUGUUAUUUUUAUUAUUAUUAUUAUUAUUAUUAUUAUUAUUAUUAUUAUUAUUAUUAUUAUUA  
UUUUUAGUUAUUAUUAUUAUUAUUAUUAUUAUUAUUAUUAUUAUUAUUAUUAUUAUUAUUAUUAUUAUUAUUAUUA  
CAUGGAUUAUUAUUAUUAUUAUUAUUAUUAUUAUUAUUAUUAUUAUUAUUAUUAUUAUUAUUAUUAUUAUUAUUA  
GCUUUGGGGCAUUUUAUUAUUAUUAUUAUUAUUAUUAUUAUUAUUAUUAUUAUUAUUAUUAUUAUUAUUAUUAUUA  
UAAAUAUUAUUAUUAUUAUUAUUAUUAUUAUUAUUAUUAUUAUUAUUAUUAUUAUUAUUAUUAUUAUUAUUAUUA

UGCCGACUAGGCUUUGGAUGAAAGAUUUUUAAAAUAGAGUUUUUCUUUCUCUCCGGAGAUUAGAACUUAUGAUUGCUU  
CCUUCAGUCCUUUAUGAGAAAUCAAAGUCUUUGGGUUCUGGGCGAGUAUUCGCGCAAGCGAGAAAGUUAAAAGAAUUGA  
CGAAGGGACCACCGAGCGUGGAGCUUGCGGUUUUUUAGUCAACACCGGGAAAACUCACUAGUUUAAGACAAGGUA  
GGAUUGACAGAUUUUAGCUCUUUCUUGAUUUUCUGGAUGGUGAUGCAUGGCCGUUUUAGUUCGUGAAUUGAUUUUGUC  
UGUUUUUUCCGUAUACGAACGAGAUUCUUAACUCUGUAUUUAGCGGCAAAUACGAUUAUUCUUUAUGUAGAAUUGAAU  
AGUGGAUUUGUAGAUUUUGAAGAAAUAUUGGAAUACGUUAAAUGUAGUUCCUUUCCUUUACUUAUUUUUACAUU  
UCCAUCUUAUUUUUUUGCGUAUGAAUGUAUUUGCUUAGAUUUAAGCUUUUAGAGGAACGAUGUGUGUCUAACACA  
GGAAGUUUAAGGCAACAACAGGUCUGUGAUGUCUUUAGAUAAUAGGUCGACGCGUGCUACACUGAUUUGUAUACGA  
GUUACUAAAUAACGAUUUUAGCUCUUGCAGUUUUUUUCGUACUUUCCUCCACUGAAAAGUGUAGGUAUUCUUUAC  
AAUACAUUUCGUGAUGGGGAUAGAUUUGCAAUUUUUAUCUUGAACGAGGAAUGCCUAGUAAGCAUGAUUCAUCAGAU  
UGUGCUGACUACGUCUUUGCCUUUGUACACACCGCCGUCUCUACCGAUUUGAAAGAUUAGAUUUGUUUGGACA  
AGAAAAAUUGGAUUUAUCUUUUUUUGGAAAACCUGAAAUCUUAUUUUAAGGAAGGAGAAGUCGUAAACAGGU  
UCCGUAGGUGAAUUC

>PFARGBAB - P.malariae small subunit ribosomal RNA gene

ATATATATATATACTGTTTGTGTTAATGTAGTAGAATACTACGATATATTTTGCATATGTGCGTTATATATTTTATG  
TATTTAAGCCATTTTTTATAACATTTAAGTTATGATATTTATTTAGTGTGAAATATGTTCTGTTTTTATAATAT  
TATATATAAGTAACCTGGTTGATCTTGCCAGTAGTCATATGCTTGTCTCAAAGATTAGCCATGCAAGTGAAGTATAT  
GCATATTTTATATGTAGAACTCGCAACGGCTCATAAAAACAGTTATAGTCTACTTGACATTTTTTTATAAGGATAACT  
ACGGAAGCTGTAGCTAATACTTGTCTTAATACTCTTAATTTTATGTTTTTTGAGTATGTTTTTTAAGCCTTATA  
AGAAAAAGTATATTAACCTAAGGATTAACAAGAAGTAACACATAATAAATTTGCAATATTTAGTGTGTATCAATCG  
AGTTTCTGACCTATCAGCTTTTGTAGTTAGGGTATTGGCCTAACATGGCTATGACGGGTAACGGGGAATTAGAGTTCGAT  
TCCGGAGAGGGAGCTGAGAAATAGCTACCACATCTAAGGAGGAGCAGCGCGTAATACCCAATTTCTAAGAAGAG  
AGGTAGTGACAAGAAATAACAATGCAAGGCCAAATTTTGGTTTTGCAATTGGAATGATGGGAATTTAAAACTTCCCAGA  
AGGCAATTTGGAGGCAAGTCTGTGCGCAGCAGCGGTAATCCAGCTCCAATAGCGTATATAAAAATTTGTCAGTTA  
AAACGCTCGTGTGAATTTCAAGGAATCAATATTTAAGTAATGCTTTGTATATTTATAACATAGTTGTACGTTAAGAA  
TAACCGCAAGGCTTATATTTTTTTTGTACATTTTGTATTATTAATATATATATGCTTCTTATATAAAAATGATCT  
TTTTAAAATTTCTTTGTATAATTTTTATGCAATGGGAATTTTGTACTTTGAGTAAATTAGAGTGTCAAAGCAAACAGT  
TAAACAGTTTCTGTGTTTGAATACTACAGCATGGAATAACAAAATTAACAAGTCAAGATTTGTTCTTTTTCTTAT  
TTGGTCTAGTTACGATTAATAGGAGTAGCTTGGGGCATTGTTATTCAGATGTCAGAGGTGAAATTTCTAGATTTCTGG  
AGACAAGCAACTCGAAAGCATATGCCATAAATACTTCCATTAATCAAGAACGAAAGTTAAGGGAGTGAAGACGATCAGA  
TACCGTCGTAATCTTAACCATAAATATGCCGACTAGGTGTTGGATGATAGTGTAAAAATAAAAAGACATTTCTATAT  
ATGAGTGTCTTTTAGATAGCTTCCCTCAGTACCTTATGAGAAATCAAAGTCTTTGGGTTCTGGGGCGAGTATTCGGC  
AAGCGAGAAAGTTAAAAGAACCAGCGAAGGGGACACAGGCTGGAGCTTGGCGCTTAATTTGACTCAACACGGGAAAC  
TCCTAGTTTAAAGACAAGAGTAGGATTGACAGATTAATAGCTTTTCTTGTATTCTTTGGATGGTATGCATGGCCGTTTT  
TAGTTCGTGAATATGATTTGCTGGTTAATCCGATAACGAACGAGATCTTAACCTGCTAATTAGCGTAATACACTATA  
TTCTTAAGTGAATTAGAATATAGATAAATTTGCTAATTTTGATTAATAATAGAAATGTTTTTTTTTAATAAAAACGTT  
CTTTTCCCTTTTCTTAATATGCAATTTTATTTCTTTTTCGATAGAAATGATTTTGGTAAATGATTTGCGTAAATGAGC  
CTTAGAGGAACGATGTGTCTAACACAGGAAGTTAAGGCAACAACAGGTCTGTGATGTCTTAGATGAACATAGGCTG  
CAGCGTGTACACTGATATGTAACAGGATTTAAAATAATATATCTTGTATGTTATACGTATTTCTATATGATGAC  
ATACAAAAGATATATAGTTTGTCTCACTGAAAGTGTAGGTAATCTTATCAATATATATCGTGTATGGGGATAGATTTG  
AATTTAATCTTGAACGAGGAATGCCFAGTAAGCATGATGACGCGGTAACGGGGAATTAGAGTTTCGATTCGGAGAGG  
ACCGCCGTCGCTCCTACCGATTGAAAGATATGATGAATTTGTTGGACAAGAAAAAGGTTTTTATTTCTTTTCTGGAA  
AAATCGTAAATCTATCTTTTAAAGGAAGGAGAAAGTCTAACAAGGTTCCGTCGGTGAACCTGCGGAAGGATCATT

>KF696369 - Plasmodium ovale curtisi clone DC-1 18S ribosomal RNA gene, complete sequence

AACTGGTTGATCTTGCAGTAGTCATATGCTTGTCTCAAAGATTAAGCCATGCAAGTGAAGTATAATGCATATTTTATA  
TGTAAGAACTGCGAACGGCTCATTAACAGTTATAATCTACTTGAATTTCTACCTTACAAGGATAACTACGAAAAGC  
TGTAAGCTAATCTTGTCTTAATCGCTTTGAATCTTTTGGATTCCCGCTATGTAAGTGTAAAGCCTTAAAGAAAGAGT  
TTATAACTTAAGGAATTAACAAGAAGTAACACATAATAAGGTTGCCTTATTTAGTGTGTATCAATCGAGTTTCTGAC  
CTATCAGCTTTTGTAGTTAGGTTAGGCTAATGCTTACGCGGTAACGGGGAATTAGAGTTTCGATTCGGAGAGG  
GAGCCTGAGAAATAGCTACCACATCTAAGGAAGGCAGCAGGCGGTAATACCCAATTTCAAAGAAGAGAGGTAGTGAC  
AAGAAATAACAATTAACAAGGCCATTTTATGTTTGTAAATTTGGAATGATGGGAATTTAAAACCTTCCAAAATTTCAATTTG  
AGGGCAAGTCTGGTGCAGCAGCCGGTAATCCAGCTCCAATAGCTATATTAATAATGTTGCAGTTAAAACGCTCGT  
AGTTGAATTTCAAAGAACTAGTATTTTAAAGTAATACTTTTGTCTATAAGATGCTTAGACAATAACAAGTATCTGTTCTTTG  
CATTCCTTATGCAAAATGTGTTCTTATTAATAAAGGATTCCTTTTAAATCTCTTTTGTATTTTTTAGTATTTGGAGAT  
TTTTGTACTTTGAGTAAATTAGAGTGTCAAAGCAAACAGTTAAAGCATTTTTACTGCGTTTGAATACACAGCATGGAA  
TAACAAAATTTGAACAAGTACAGATTTCTGTTCTTTTCTTATTTTGGCTTAGTTACGATTAATAGGAGTAGCTTGGAGC  
ATTTGTATTCAGATGTCAGAGGTGAAATTTCTTATGTTTCTGGAGACAAAACACTGCGAAAGCATTTGCTTAAATACTT  
CCATTAATCAAGAACGAAAGTTAAGGGAGTGAAGACGATCAGATACCGTCGTAATCTTAACATAAATATGCGACATAG  
GTTTTGGATGAAAGATTTTAAATAAGAAAATTCCTTTTGGGAAATTTCTTATGATTTCTCAGTACCTTATGAGA  
AATCAAAGTCTTTGGGTTCTGGGGCAGTATTTCGCGCAAGGAGAAAGTTAAAAGAAATGACGGAAGGGCACCACAGGC  
GTGGAGCTTGGGCTTAATTTGACTCAACACGGGAAACTCAGTATTAAAGACAAGAGTAGGATTGACAGATTAATAGC  
TCTTCTTGTATTTCTGGATGGTGATGATGGCCGTTTTTGTTCGTAATATGATTTGTCTGGTAAATCCGATAACGA  
ACGAGATCTTAACCTGCTAATAGCGCGAATACGTGATATTTCTATGCGAAATTTGAATATAGCTGAATTTGCTTATTTT  
GAAGAATACATTAGGATACAAATTAATGTCTCTTTCCATTTCTTAAATTCGCAATTTCAAGTCTTCTTTTGTGCA  
TTAGAATGATTTGTTGATTGTAAGCTTCTTAGAGGAACGATGTGTGCTAACACAAGGAAGTTAAGGCAACAACAG  
GTCTGTGATGTCTTAGTGAACTAGGCTGCACGCGTCTACACTGATATGTAACAGGATTTACTAAAATAATACTTTT  
TTAGGGTATTTATATCTTTTCAATTTGATAGTTTCTCCACTGAAAGTGTAGGTAATCTTTATCAGTACATATC  
GTGATGGGATAGATTTTCAATTTAATCTTGAACGAGGATCCATAGTAAGCATGATCATCAGATTTGCTGATG  
ACGTCCTTGCCTTTGTACACACCGCCGCTGCTCCTACCGATTGAAAGATATGATGAATTTTGGACAAGAAAAGAAA  
GAATTTATATCTTTTCTGAAAACCGTAAATCTATCTTTTAAAGGAAGGAGAGTCTAACAAGGTTTCCGTA  
GGTGAACCTGCGGAAGGATCATT

>X13926 - Plasmodium vivax small subunit (SSU) rRNA gene

ATCTGTTCAATTTATGCTATATGATTGAGTGTGTTTATGAAAGGCATCATGGTGGGGTTAAGAAGACCTTGCATG

AAAGACTAGCATTGTAGGTATGTTACTCTTAACCTTTTAGTAGGTGCAATAATTCCTATCATAAAGTTATATGAAAGAT  
AACGAAAATGGTAAGGAAATGACAAAATAAACCGTCAGCTGTAGTTATTTATACGTTACTATGCGAAAGGTAGTAACATGTT  
AGCGAACACGAAGTGTGTTTATACAGCAAAATGGAGTGTAGTGTAAAGTGTCTACAATGTGCACCTCTCACTCCCC  
ACTGCCGTATATAGTAACCTGGTGTATCTTGCCAGTAGTCATATGCTTGTCTCAAAGATTAAGCCATGCAAGTGAAAGTA  
TATGCATATTTTATATGTAGGAAGCTCGCAACGGCTCATTTAAAACAGTTATAATCTACTTGACATTTTTTCTATAAGGATA  
ACTACGGAAAAGCTGTAGCTAATACTTGGCTTTAGCACTCTTGATTCATTTCTTGAGTGTGACTTGTAAAGCCTTTTAAAG  
AAAAAGTTATTAACCTAAGGAATTTATAACAAAAGAACGACAGTAATGGATCCGTCATTTTTAGTGTGTATCAATCGA  
GTTCTGACCTATCAGCTTTTGTAGTTAGGGTATTTGGCCTAACATGGCTATGACGGGTAACGGGGAATTAGAGTTGATTC  
CGAGAGGGGAGCCTGAGAAATAGCTACCACATCTAAGGAAGGACGAGCGCGCTAAAATACCCAATTTAAAGAAAGAGAG  
GTAGTGACAAGAAATAACAATAACAAGGCCAATCTGGCTTTGTAATTTGGAATGATGGGAATTTAAAACCTTCCAAAACCTC  
AATTTGGAGGGCAAGTCTGGTGCCAGCAGCCGCGGTAATTCAGCTCCAATAGCGTATATTTAAAATTTGTCAGTTAAAAC  
GCTCGTAGTTGAATTTCAAAGAATCGATATTTTAAAGCAACGCTTCTAGCTTAAATCCACATAACTGATACTTCGTATCGAC  
TTTTGTGCGCATTTTTGCTATTTATGTTCTTTTTAATTTAAAATGATTTCTTTTTAAGGACTTTCTTTGCTTGGCTTGGAAAT  
CCTTGTACTTTGAGTAAATAGAGTGTTCAAAGCAACAGATATAGCATTGCGCCGTTTGAATACTACAGCATGGAATA  
ACAAATGAAACAGTCAAAATTTTTCTTTTTTTCTTATTTTTGGCTTAGTTACGATTAATAGGAGTAGCTTTGGGGCAT  
TTGTATTCAGATGTCAGAGGTGAAATTTCTAGATTTTTCTGGAGACAAACAACGCGAAAGCATTTGCCATAAAATACTTCC  
ATTAATCAAGAACGAAAGTTAAGGGAGTGAAGACGATACGATACCGCTCGTAATCTTAAACATAAACTATGCCGACTAGGC  
TTTGGATGAAAGATTTTAAAATAAGAATTTTTCTTTCGGAGTTTATTTCTAGATGCTTCTTCTTCACTGCTTATGAGAAA  
TCAAAGTCTTTGGGTTCTGGGGCGAGTATTCGCGCAAGCGAGAAAAGTTAAAAGAATTCGGAAGGGCACCACCAGGCGTGG  
AGCTTGGCGCTTAAATTTGACTCAACACGGGAAACTCACTAGTTTAAAGACAAGAGTAGGATTGACAGATTAATAGCTCTT  
TCTTGATTTCTTGGATGTTGATGCATGGCCGTTTTTAGTTCGTGAATATGATTTGCTGTTAATTCGGATAACGAAACGA  
GATCTTAACTGCTGATTAAGTACGATAATTTCTTACGTGGACTGAATTCGGTTGATTTGCTTACTTTGAAAG  
AAATATTGGGAAACGTAACAGTTTCCCTTTCCCTTTTCTACTTAGTTGCTTTTCTACTGTTTCTTTTTCGCGTAAGAAT  
GTATTTGCTTGATTTGTAAGCTT

>AJ009141 - Trypanosoma brucei gambiense 18S rRNA gene, isolate Tsuaa (clone G)  
GTCAATGCTTGTTCFAAGGACTTAGCCATGCATGCCCTCAGAATCAGTGCATTGCAGGAATCTGCGCATGGCTCATTACA  
TCAGACGTAATCTGCGGCCAAAATTTTGGCGTCTCCGCATTACTGGATAAAGTTGGCGAAAACGCAAGCTAATACATGAAC  
CAATCGGACGCTCTCTTTTCTATGTCGCGGCTTGTGTTCACGCACTTGTGCTGGCGATGGGACGTCAGCGAATGAATG  
AAATTAGAACCAACGCTCCACCCGGGGCAGTAACACTCAGACGTTGACTCAATTCATTCGTCGGAAGCCGAGCC  
TTGTTGCTCGGCTCTACTGACGAACAACCTGCCCTATCAGCCAGTATGCGCGTGTAGTGACTGCGCATGGCCTTGGCGG  
GAGCGGGGATTAGGTTTCGATTCGGGAGAGGGAGCCTGAGAAAATAGCTACCCTTCTACGGAGGGCAGCAGGCGCGCAA  
ATTTGCCAATGTCGAAAAATACGATGAGGACGCGAAAAGAAATAGAGCCGACCGTGCCTAGTGCATGGTTGTTTTCAA  
TGGGGGATACTCAAACCCATCAATATCGAGTAACAATTTGGAGGACAAGTCTGGTGCCAGCACCCGCGGTAATTCAGCT  
CCAAAAGCTATATTAATGCTGTTGCTGTTAAAGGGTTCTGATTTGAAGTGTGGCCACGTAAGTTTTTGGCGTCCAGT  
CCCGTCCACCTCGGACGTTGTTTTGACCCAGCCCTCGTGGCCCGTGAACACACTCAGATACAAGAAACACGGGAGCGGTT  
CCTCTCACTTTACGCAATGTCATGTCATGCGAGGGGGCGTCCGTGAATTTTACTGTGACCAAAAAGTGGCACCAGCAAGCA  
GTCTGCGCACTTGAATTAACAAGCATGGGATAACGAAGCATACGCCCTGGGGCACCCTTTGGGCTTTTGTGTTGTTTTAG  
AAGTCTTTGGGAGATTATGGGGCCGCGTTCCTTGGGTCCGTTTCTGCTGCTCAATTTTTGTGGCGCGACATTCGGCTCT  
TCGTGATGTTTTTTTACATTCATGCGACGCGCGGCTTCCAGGAATGAAGAGGGTAGTTTCGGGGGAGAACGTAAGTGTG  
CGTCAGAGGTGAAATTTTAGACCGCACCAAGACGAATACAGCGAAGGCATTTCTTCAAGGATACCTTCTCAATCAAGA  
ACCAAAGTGTGGGATCAAGATGATTAGAGACCATTGTAGTCCACACTGCAAAACACTGACACCATGAATTTGGGGAACA  
TCATTTGGGTGCCCGTGTGGCGGCTTTTTGTGCCACCCCTCGGCCCAATTTATTTATCAATTTACGTGCCTATTCTATCA  
CCCCCGTTCCCTTTTTGAGGTTCTTCCGGGTTTTTTTACGGGAATATCCTCAGCAGTTTTCTACTTCTTACGCGAA  
AGCTTGGAGGTTACAGTCTCAGGGGGAGTACGTTTCGCAAGAGTGAAGTAAAGAAATGACGGAAATGGCACCACAAGA  
CGTGGAGCGTGGGTTTTAATTTGACTCAACACGGGAACTTTTACCAGATCCGACAGGGTGAAGATTGACAGATGACAGATG  
TTCTTTCTCGATCCCTGAATGGTGGTGCATGGCCGTTTTTGGTGGTGGAGTGAATTTGTTGGTTGATTCCGTCAACGG  
ACGAGATCCAAGTGCAGTAGGTGCCGGGATTTGTCACACAGGACAGCAGTCCCTCCGGCGGGGATTTTTTCCCCAAC  
GGTGGTCTGATCCTCTTTTACAGGCCCTTCTCTGCGGATTTCTTGTCTTTTCCGCAAGGTGAGATTTTGGGCAAC  
AGCAGCTGTGATGCTCTCAATGTTCTGGGCGACACCGGCACTCAATGTCAGTGAAGAAAGAGTCCGACGCGGACT  
TCACAATGTCGCTCCCGTTGATCAAAGAGCGGGGAAACCACGGAATCAGTACAGCCACTTTGGACCGAGTATTGCAA  
TTATTTGGTCCGCAACGAGGAATGCTCTGATAGGCGAGCTCATCAAACTGTGCGGATTTACGTCCTGCGCATTTGTACACA  
CCGCCGTCGTTGTTCCGATGATGTCGAATACAGGTGATCGGACCGTCTGCTCTCGGGCAGCCGAAAGTTACCCGA  
TATTTGCTTCAATAGAGGAAGCAAAAGT

>AF239980 - Trypanosoma cruzi strain Colombiana 18S ribosomal RNA gene, complete sequence  
CATATGCTTGTTCFAAGGACTTAGCCATGCATGCCCTCAGAATCAGTGCATTGCAGGAATCTGCGCATGGCTCATTACATC  
AGCCTAATCTGCGCAAAAATCTTGGCGTCTCCGCAAAATTTGGATAAAGTTGGCGAAAACGCAAGCTAATACATGAACCA  
ACCGGATGTTCTGTTCCGGCGCAGGGCAACCTGCTGCCATGGGACGTCAGCGAATGAATGAAAGTAAAACCAATGC  
CTTACCCGGCAGTAACACTCAGAAGTGTGATTCATTCATTCGCTGCGAAAGCCGGGTTTTTATCCGGCGCTTTTTG  
ACGAACAACCTGCCATCAGCCAGCGATGGCCGTTGATGAGTGCATGGCCTTGGCCTTGGCGGAGCGGGGATTAGGTTTCG  
ATTCGGGAGAGGGAGCCTGAGAAAATAGCTACCCTTCTACGGAGGGCAGCAGCGCGCAAAATGCCCAATGCTCAAAAAA  
AAAGATGAGGCGAGCAAAAAGAAATAGAGCCGACAGTGTCTTTGATTTGTCGTTTTCAATGGGGGATATTTAAACCCATCC  
AAAATCGAGTAACAATTTGGAGGACAAGTCTGGTGCAGCACCCGCGGTAATTCAGCTCCAAAAGCGTATATTAATGCTG  
TTGCTGTTAAAGGGTTCTGATTTGAATTTAGGGCCCTTAAAGCGCAATGGTTTAGTCCCATCCACTTCGGATTGGTGACC  
CATGCCCTTGTGTCGCGTCCGTAACAGACATATTCAGAAAACAAAACAGGGAGTGGTACCTTTTCTGATTAATTCGATGTC  
TGATGCCAGAGGGCGCCGTTGATTTTTACTGTGACTAAAAAGTGTGACCAAGCAGTCAATTCGACTTGAATTAGAAA  
GCATGGGATAACAAGGAGCAGCCTCTGGGCCACCGTTTTGCGCTTTTGGTGTGTTTAAAGTCCATTGGAGATTTATGGGG  
CAGTGTGACAAGCGGCTGGTGGTTATTCACACACACAGCACACTCTTTTTGGATGTTGTGCTTGTGTGTGGCAC  
TCTGCCCTTTGGGAAATCCGTTGGTGTGGCCTTTGTTGGTGTGTCAGACTTCGCTTCCACACAGTTTCA  
CATGTGTCATGCCCTTCCCTCACTCACGGCATCCAGGAATGAAGAGGGTAGTTTCGGGGGAGAACGTAAGTGTGCTCAG  
AGGTGAAATTTCTAGACCGCACCAAGACGAACTACAGCGAAGGCATTTCAAGGATACCTTCTCAATCAAGAACCAAA  
GTGTGGGATCGAAGATGATTAGAGACATTGTAGTCCACACTGCAAAACGATGACACCATGAATTTGGGGAGTTTTGGT  
CGTAGGCGTGGTCCGGCTTGTATATATTTTTCATCCCGCTTCTGCTCGCAATGAATATATTTAAATTTACGTCGA  
TATCTTTTTTGGTCTTCGTTTTTTTTTACGGCGAGGACCTTAAACGGGAATATCCTCAGCAGTTATCTGACTTCTTACG

CGAAAGCTTTGAGGTTACAGTCTCAGGGGGGAGTACGTTTCGCAAGAGTGAAACTTAAAGAAATGACGGAATGGCACCAC  
AAGACGTGGAGCGTGCCTTTAAATTTGACTCAACACGGGGAACCTTACCAGATCCGGACAGGGTGAGGATTGACAGATTG  
AGTGTTCCTTTCTCGCATCCCTGAAATGGTGGTGCATGGCCGCTTTGGTTCGGTGGAGTGATTTGTTGGTTGATTCCTGCA  
ACGGACGAGATCCAAGCTGCCAGTAGGATTACAGAAATGCCCATAGGATAGCAATCCCTTCCGCGGGTTTTACCCAAGGG  
GGGCGGTATTCCGTTGATCCTTCTCTGCGGGATTCTTGTGTTGCGCAAGGTGAGATTTTGGGCAACAGCAGGTCGT  
GATGCTCCTCAATGTTCTGGGCGACACGCGCACTACAATGTCACTGAGAACAGAAAAACGACTCTTGTGCGGACTACTT  
GATCAAAAGAGTGGGAAAACCCCGAATCAGTAGACCACCTTGGGACCGAGTATTGCAATTAATGGTCCGCGCAACGAGG  
AATGTCTCGTAGGCGCAGCTCATCAAATGTGCCGATTACGTCCTGCCATTTGTACACACCGCCCGTCTGTTGTTCCGA  
TGATGGTCAATAAGGATGATCGGACAGTCGAGTGCTTCACTTGACCGAAAGTTCACCGATAATTTCTTCAATAGAGGAAG  
CAAAAG

>AF227234 - *Wuchereria bancrofti* 18S small subunit ribosomal RNA gene, partial sequence

AGCCATGCATGTCTAAGTTCAAATAAACCTATAATGGTGAACCGGAAACGGCTCATTATAACAGCTATAATGACTTGA  
TGTTGATTATCCAACGTGGATAACTGTGGCAATTCATAGAGTAATACATGCACCAAAGCTCCGATTTTATAGACGAGCGCA  
TCTATTAGATTAAAACCAATCGGATTATTAATTAACCCGTTAATTGGTGACTCTGAATAGCTATGGCTGATCGCATGGTCT  
TTGTACCGGCGAGCTATCTATCAAGTGTCTGCCTTATCAACTTTCGATGGTAGTTTATGTGCCATCCATGGTTGTAACCG  
GTAACGGAGAATAAGGGTTCGACTCCGGAGAGGGAGCCTGAGAAACGGCTACCACATCAAGGAAGGCAGCAGGCGCGCA  
AATTACCACCTCTCAGAATGAGGAGGTAGTGACGAAAAATAACGAGACCGTTCCTTTGAGGCGGGTATCGGAATGGGT  
ACAATTTAAACCGGTTAACGAGGATCTATGAGAGGGCAAGTCTGGTGCCAGCAGCAGCGGTAATTCAGCTCTCAAAGT  
TATATCGTCATTGCGCGGTTAAAAGAGCTCGTAGTTGGATCTGCGTCTCAGGACCTGGTCCATCCATTGGATGAGAATAG  
GCTCCTAGTAATATTGCGAGTTTCCCATACGTTACCTTAATTTGGTTCATATGGTGGCTAGCAAGTTTACCTTGAAAA  
AATTAGAGTGCTCAATGCGGGCTAATGCCTGAATACCTCGTGCATGGAATAATGAAATAGGATCTCGGTTCTATTTGTTGG  
TTTTCTGATCTGATGATAATGGTTAAGAGGACGCGAGGGGCAATTCGATCGCTGCGTGAGAGGTGAAATTTGAGACCG  
TAGCGAGACGTACGACTGCGAAAGCATTGCAAGAAATGTCTTCAATTAATCAAGAACGAAAGTACAGAGGTTGCAAGGCGA  
TCAGATACCGCCCTAGTTCTGACCGTAAACGATACCACTAGCGTTCGCTCGGCGGTAATACGCCTTGACGGGCAGCTT  
CCCGGAAACGAAAGTTTTCGGTTCGGGGGAAAGTATGGTTGCAAAAGCTGAAACTTAAAGAAATGACGGAAGGGCAGCA  
CCAGAGTGGAGCTCCGCGCTTAAATTTGACTCAACACGGGAAACTCACTGCGCCGACAGCTGAGGATGACAAATTA  
GAGAGCTCTTTCATGATTCGGTGGTGGTGGTGCATGGCCGTTCTTAGTTGGTGGAGTGATTTGTCTGGTTTATTCCGAT  
AACGAGCGAGACTCTAGCTTAAATAGTTACTGGATAATTTTATCGTCCAGACAACCTTCTAGAGGGACAAGCGGTGT  
TTAGCCGCATGAAGTTGAGCAATAACAGGTCTGTGATGCCCTTAGATGTCAGGGCTGCACGCGCGCTACACTGGAGGAA  
TCAGCGTCTGTAACCAATACCAGAAAGGTATTGGTAAACCCCTTGAAATCCTCCGTGATCGGGATCGGGAATGCAATTA  
TTCCCTTGAACGAGGAATTCCTAGTAAGTGTGAGTCAATCAGCTCACGTTGATTACGTCCTGCCCTTTGTACACACCGC  
CCGTCGCTGCCCGGACTGAGCCGTTTCGAGAAAGCGGAGACTGCTGTTTTGATAACCTTTCAAGGGTAGAGATTCTTTG  
GTGAAACTGCTTTAATCGCAGTGGCTTGAACCGGCAAAAGTTCGTAACAAGGTTCCGTAAGTGAACCTGCAGCAGG

>SMU65657 - *Schistosoma mansoni* 18S ribosomal RNA gene, complete sequence

AACCTGGTTGATCCTGCCAGTAGTCATATGCTTGTCTCAGAGATTAAGCCATGCATGTCTAAGTACATACCTTAAAACGG  
TGAACCCGCAATGGCTCATTAAATCAGCTATGGTTCCCTTAGATCGTAAACGCTACATGGATAACTGTAGTAATTTCTAGA  
GCTAATACATGCCTTGAATCCCTGACCCGCAAGGGGACGGTGCATTTATTAGAACAAGCAACCGGGTGCAGGCTTCCG  
CTGTGCCGTTTACATCTGTGATGACTCTGGATAACTTTACTGATCGCAGTCCGCTTGTGTGCGGCGAGCTTTCCAA  
ATGTCGCGCTATCAATTTGTTGGTAGGTGATTGCGCTACCATGATGATAACGGGTAACGGGGAATCAGGGTTCGATTCC  
GGAGAGGGAGCCTGAGAAATGGTACCACATCAAGGACGGCAGCAGGCGGCAAAATTACCCACTCCCGGCACGGGGAGG  
TAGTGCAGGAAAATACGATATACGGGACTCAATGAGGCTCCGTAATTCGAATGATTACAATTTAAATCCTTTAACGAGGA  
CCAATTTGAGGGCAAGTCTGGTGCCAGCAGCCGCGTAATCCAGCTCCAAAAGCGTATATTTAAAGTTGCTGCAGTTAAA  
AAGCTCGTAGTTGAATCTGGGTGCTGCGGTGCGATGCCGTTGCTTGTTCACGTTTGGTTACGATCAGGACAGGTGTT  
AGCTCGGTGATGTTGCTGAGCCTTTTACCGCTGCTGTGTTAAACGGGTGCTGGTGGGTTGACRAGTTCCGCTTGTGTT  
GACCTGTCCGCAATGCTCCGATGCCTTTAAACGGGTGCTCGGAGCGGACGATCTTTACTTTGAAACAAATTTGAGTGC  
TCAAAGCAGGCCATGTCCTGAAAATTTCTTGCATGGAATAATGAAATAGGACTTCGGTTCTATTTTGTGGTTTTCCGA  
TCCGAAGTAATGTTAAGAGGGACAGACGGGGCATTGTTATGGCGGTGTAGAGGTGAAATTTCTGGGATCGCGCCAGA  
CAAATACAGCGAAAGCATTGCAAGAAATGTTTTCATGATCAGGAGCGAAAGTACAGGTTTCAAGACGATCAGATAC  
CGTCGATGTTCTGACCAATAAACGATCCCACTGACGATCCGCGTGGTTCATAATAAGATGACATCGCGGGCAGCTCCCGGGA  
AACCTTTAAGTCTTTGGGCTCCGGGGGAGTATGGTTGCAAGCTGAAACTTAAAGGAATGACGGAAGGGCACCCACG  
GAGTGGAGCCTGCGGTTTAAATTSAGCTCAACACGGGAAACTCACCCGCGCGGACACTGTGAGGATTGACAGATTGATA  
GCTCTTCTGATTCGGTGGTGGTGGTGCATGGCCGTTCTTAGTTGGTGGAGCGATTTGCTGGTTAATTCGGATAACG  
AACGAGACTTTAACCCTGCTAAATAGTAGACTGGTCTCTGCTGCTTTAGGGCGCGCTTCTATTGCTTCTTTATGGAG  
TAGTGTGGTCTGATCCGCGGGTGGTGGTGGCAGTTTACTTCTTAGAGGGACAAGCGGCACACTTAAGTCCGACGAAA  
TTGAGCAATAACAGGCTGTGATGCCCTTAGATGTCGCGGGCCACAGTGCCTGACATGACGGTGCAGCGAGTCTGGA  
AACCTGGCCCGAAAGGTTGGGCAACCTGTTTCACTCACCGTCTGACTGGGATCGGGGCTTGCATTTATCCCGTGAAC  
GAGGAATTCCTGGTAAGTGAAGTCAATAAGCTTGCCTGATTACGTCCTGCCCTTTGTACACACCGCCCGTCTACTA  
CCGATTGAATGGTTTAGTGAGGTCGTTGGATTGGCGTCTGTTAGTGGCTTTGCCGCTCGACTGATGCTGAGAAGATGAC  
CTAATTTGACTATTTAGAGGAAGTAAAAGTTCGTAACAAGGTTTCCGTAAGTGAACCTGCAGAAGGATCA

>AY851265 - *Trichuris suis* 18S ribosomal RNA gene, complete sequence

TACCTGGTTGATCCTGCCAGTAGTCATATGCTTGTCTCAAAGACTAAGCCATGCAAGTGAAGCGCACACCGCTGAACGG  
TGAAGCCGCAATGGCTCATTACAGCAGTCAATGTTCCGCAAGAACTGATGTCACTTGATAACTGTGAAATTTCTAGAGC  
TAATACTGCCTCGAAGCTCGGTCCGCGCAACGCTCGGAGCGCATTATTTAGAACAAAACCAATCGGACGCAGGCTATCT  
ATTGGTCTGGTCCCGGAAAGGTTGGTGAATCGGAATAACTATGCTGATCGCAGCTCCAGCACCGGCGGCAAGCAATTTGA  
AATGACTTGTCTCACTTTCGATGGTACGCTACGTGCTTACCATGGTGACAACGGTTAACGGAGAATCAGGGTTCGAC  
TCCGGAGAGGGAGCCTGAGAAACGGCTACCACATCCAAGGAAGGCAGCAGGCAGCAATTACCCACTCCAGATCGGG  
AGGTAGTGACGAAAAATAACGGAACTATCTCCATGAGACGCTTACCAGGACGACTGAGCCGTACACAAGCTCGGCTAA  
ATCTATTGGAGGCAAGTCTGGTGGCAGCAGCGGCTAATCCAGCTCCAATAGCTATATTTAAAGTTGCTGCGGTTAA  
ACCGCTCGTAGTTGGATTGCGGATGTCGACGACGGTCTGCTTAAAGCAGGATCGTCCGTCGCTGCTCACCTGTTGATC  
AAGATTGCCCTGGATGCTTTCAGTGTGCTTGGCGACTTGAAAGTTTACTTTGAGAAAATGGAAGCGCTCAAGGCA  
AGCCGTGATGCTTGAACCGTGGTGCATGGAATAATAGAAGATGGCTCAGTGCTATTTTGTGGTTGCGGCTATGAGG  
CAATGATTAAGAGCAGACGAGGGGACATTCGATGCTGCGTTAGAGGTGAAATTTGGAATCGCAGCAAGACGACCAA  
TTGCGAAAGCATTGTTCAAGAATGTTTTCAATTAATCAAGAACGAAAGTTAGAGGTTGCAAGGCGATCAGATACCGCCCTA

GTTGTGACCGTAAACGATGCCAACACGCGATTCGGCGACGTTCTTTTTATGACTCGCTGAGCAGCTTCCGGGAAACAAA  
GTGTTCCGGTCCGGGGGAAATATGGTTGCAAAGCTGAAACTTAAAGGAAATGACGGGAGGGCACCACAGGAGTGGAGC  
ATGCGGCTTAATTTGACTCAACACGGGAAACTCACCGTCCGAACACTGTGAGGATGACAGATCAAGAGCTCTTTCT  
TGATTCAGTGGGTAGTGGTGCATGGCCGTTCTTAGTTGGTGGAGCGATTTGCTGGCTAATCCGATAACGAACGAGACT  
CTGGCCTACTAATAGCGCGGATTCACGCTCTCGCGACGCGTGCCTACGTGTGCGCTGAGCAGCTCGCCGTTCCGC  
GCGAGTCCCGGGACACCTGCAGTCCGGCGACCGCTTCTTAGAGGGACCGGACACTTTCGCAAGCCGACGAGAAAAGA  
GCAATAACAGGTTGTGATGCCCTTAGATGTACGGGCTGCACGCGTGTACTGACGGGCTGAGCGTGGCTTCAAGCC  
CGGCTGGCAAGGCCGGGAAATCGGCTGAAACGTTCTCGTACTGGGACAGGGAATTGCAATTAATCCCTCGAACGAGG  
AATCCCAGTAAGCGCGAGTCACTAGCTTGCCTGACTACGTCCTGCCCTTTGTACACACCCCGCTCGCTACTACCGA  
TTGGATGATTTAGTGAGGCTTTGGACCGATGCCGCGGTTGTCGGCCGGTGGTTGAACCACGGCGTCGGGAAGCTGGC  
CGAACCAACCACTTAGAGGAAGTAAAAGTCGTAACAAGTTTCCGTAGGTGAACCTCGGAAGGATCATT

>JX943583 - *Trichomonas vaginalis* isolate 003 18S ribosomal RNA gene, partial sequence

TGTC AAGATTAAGCCATGCAAGTGTAGTTACAGGTAACGAACTGCGAATAGCTCATTAATACGCTCAGAATCTATTTGG  
CGGCGACCAACAGGCTTAAATGGATAGCAGCAGCAACTCTGGTGTAAATACATGCGATTGTTTCTCCAGATGTGAATTA  
TGGAGAAAAGTTGACTCAATCAGAGGACCGCATTCAGTACTGATGACCTATCAGCTTGTACTTAGGGTCTTTACCTAGG  
TAGGCTATCAGGGTACGGGCGGTTACCGTCGGACTGCCGAGAAGGCGCTGAGAGATAGCAGCTATATCCACGGGTA  
GCAGCAGGCGCAAACTTCCCACTCGAGACTTCCGAGGAGGTAATGACCAGTTCATTGGTGCCTTTCGGTACTGTGG  
ATAGGGGTACGGTTTCCACCGTACCGAAACCTAGCAGAGGGCCAGTCTGGTGCCAGCAGCTGCGGTAATCCAGCTTG  
CGATTTTGTCTCCATATTTGTTGAGTTAAAACGCCCGTAGTCTGAAATGGCCAGCAATGGTCTGACTATTTTACGTTT  
ACTGTGAACAAATCAGGACGCTTAGAGTATGGTACATGAATGACTCAGCGCAGTATGAAGTCTTTGTTTTCTCCGAAA  
ACAAGCTCAATGAGAGCACTCGGGGTAGATCTATCTCATGACGAGTGGTGAATACTTTGACTCATGAGAGAGAAGCTG  
AGGCGAAGCGCTCAGCTTAGAGGTTTCTGTCGATCAAGGGCGAGAGTAGGATATCCAACAGGATTAGAGACCTCGGTA  
GTTCTTACCTTAAACGATGCCGACAGGAGTTTGTCAATTTGTTAATGGCAGAATCTTTGAGAAAATCATAGTTCTTGGCT  
CTGGGGAACTACGACCGCAAGGCTGAACTTGAAGGAATTGACGGAAGGGCACACCAGGGGTGGAGCTGTGGCTTAAT  
TTGAATCAACCGGGGAACTTACCAGGACAGATGTTTTTATGACTGACAGGCTTCCGGTCTTTCAGGATATGTTTTT  
TGGTGGTGCATGGCTGGTGGTGGTGGTGGTGGTGGTGGTGGTGGTGGTGGTGGTGGTGGTGGTGGTGGTGGTGGTGGT  
ATTTACTTTTCCGGAAGTCTTTCGGTTAAAGTCTAATTTGGACTCCCTGCGATTTTAGCAGGTGGAAGAGGGTAGCAATA  
ACAGGTCGCTGATGCCCTTAGATGCTCTGGGCTGCACGCGTGTACAATGTTAGGATCAATAGGACTGCGAGCCTGAGA  
GGGTGGCTACTCTTATAATCCCTAACGTAAGTGGGATGACGTTTGTAAATCAGCGTCATGAACCAGGAATCCCTGTAA  
ATGTGTGTCACCAACGCACGTTGAATACGTCCTGCCCTTTGTCACACACCCGCTCGCTCCTACCGATTGGATGACTCG  
GTGAATCACCAGGATGCTTACGAGCAGAAAGTATTAATCAGCTTATCTAGAGGAAGGAGAAGTCTGTAACAAGGGTAAC  
GGAAGGGGCCACCGCCACCGCA

>JQ677148 - *Dientamoeba fragilis* isolate Df1085 18S ribosomal RNA gene, partial sequence

CTCGTGCTAATACATGAAATTTAATAATCTTAAATTAATACAGATTAATTTTAAATACCTTTTAAATAGGTAATCCAATCG  
AATGAGTGACCTATCAGGCCAGTACTTAGGGTCTTACCTAAGTAAGTATCAGGGTACCGGGCGGTTACCCTGCTACT  
GCCGAGAAAGGCCCTGAGAGATAGCGACTATATCCACGGGTAGCAGCAGGCGCAAACTTACCCTCGAGACTATCGG  
AGGTGGTAATGACCACTTAAAGAAATTTCCCTTATTATAGGAATATACTTTCCAGTATATGTAACCTTACG  
AGGGCCAGTCTGGTGCCAGCAGCTGCGGTAATTCAGCTGCAAGTTGCTCCCATATTGTTAGTTAAACCGCTCG  
TAGTCTGAATTAATTTAATTTAATTTTAAATTTAATTTAATTTAATTTAATTTAATTTAATTTAATTTAATTTAATTTA  
AGAAGCTTAAAGTAATTTCTTTATTGAATGATTTAGCGCAGTATGAAATTTTACTTTTTAAATTTAATTTAATTTA  
CAAGTAATATCAAAGGAAATACCGGGATAGATCTAATTTTATGCGAACAGCGAAATGTTTTGACCCATGAGAGAAA  
CGAAGGCCGAAAGCATCTATCAAGTGTATTTCTATCGATCAAGGGCGAGAGTAGGAGTATCCAACCGGATCAGAGACCCG  
GTAGTTCTTACCCTTAAACTATGCCGACAGGTTTGTGTTTTTAAATAAAGCAGTACCATAGGAGAAATCATAGTTTCA  
GGGCTCTGGGGAACTACGACCGCAAGGCTGAACTTGAAGGAATTGACGGAAGGGCACACCAGGGGTGGAGCTTGTGGC  
TTAATTTGAATCAACACGGGAAACTTACCAGGACAGATATTTTAAATGACTGATCAGGCTATAGGTTCTTTACGAT  
GATTTTTGGTGGTGCATGGCCGTTGGTGGTGGTGGTGGTGGTGGTGGTGGTGGTGGTGGTGGTGGTGGTGGTGGTGGT  
CCAATTAATATATAAATATTTTATTAAATAATTTAATTTTCTAATTTGGACTCCCTGCGCTAAGCAGGAGGAAAGATG  
GTAGCAATAACAGGTCGCTGATGCTTTAGATGCTCTGGGCTGCACGCGCTACAATGTTAATAAAGAGGTTTGG  
TAAATCGATAGATTATCTTTTTTTTTTAAAGAAATTTTCAAGCTACTCTGTTAATATATAACGTAGTTGGGATGAAATG  
TAATCATATCATGAACCAGGAATCCCTTGTAAATGCGTGTCAACAACGCGGTTGAATACGTCCTGCCCTTTGTACAC  
ACCGCCGTCGCTCCTACCGATTGAATGACTCGGTGAAATCATTAGATCATTTTTTAAATGAAAGGTTGATTAATCAG  
TTATTTAGAGGAAGGAGAAGTCGTAACAAGGTAACGGTAGGTGAACCTGCCGTTGGATCAG

>AB444953 - *Entamoeba coli* gene for 18S ribosomal RNA, complete sequence

TATCTGGTTGATCCTGCCAGTATATATGCTTCTGTCAAAGATTAAGCCATGCATGCTAAGCAAAAAGTCCTAGTAAGA  
TGAAGCTCGAACGGCTCATTACAACAGTTATAATCTTTTGTATGAAATACGTACAAGGATACTTTGAGAAATGTCAAAG  
CTAATACTGACGGGAAACCGCTCAGTGCAGTGTGTTTCCCGGGAGCATAAATCTACTGAGGAGGGGAGGATCCTTATG  
GTCCTTTCAATATATTACCACCTTCTTTGTGAATAAGGGTGGATTATATGCCAAGAGAAATGTAGAAAATCGAAAAGATTTT  
ACAAGTCACTAATGAATATCTGACCTATCAACTGGTGTGGTGAAGTGTGGCTTACCAAGGTGATAACGGGTAACG  
AGGAATAAGGGTTCGACATCGGAGAGGGAGCTTTAGAAATGGCTACCCTTCTAAGGAAGGCAGCAGGCGGAAAAATAC  
CCAATTTAACAACCTGAAGGAGTGTGACGACAATTAACGCTTTCCCTCGCATTTTGTGAGGATGCGGAAATGATCAC  
GACATAAACCATCGTGAGAAAGCGATTGGAGGGCAAGTCTGGTGCAGCAGCCGCGGTAATCCAGCTCCAATAGTGTAT  
TGTAAAGTTGTTGTGATTAACGCTCGTAGTTGAATGAAACAATCGAGGCATGATTACGTTCTCTGGCGTGTGAGCT  
TGCTCATTTGTCAGTAGGACCGCAATCAATGAATGTCTACTATAAGCGGGAGTTGATTCAGTTCCAAACTCTTTTACTT  
TGATTAATCAAGGTGCTTAAAGCAAAATCTTCTGTTAATGAATGATGAAGCATGGTATAAAAACGAAAAACGAAAGAA  
ATCAATATGAATATGAGGATGGCTTGCCATTCGAATTTTCCGGTGTGTTGTTTTGTTTTAAACAAGATTAAGAGAAAT  
GATTAGGGTGAATTAGATAGGAACGGGAGAGGTTGAATTCATGATCGTTTCGAGATAAACGAGAGCGAAAGCATTTTAC  
TGAATTCATTTCAATTAATCAAGAACGAAAGTCAGGGAATCAAAGCAGATTAGATACCGTCTGATGCTTACGACATAACGA  
GTCACCTAAGGATGGATGGAATAAGAAATTTTCAAGTACGGGTTCTAATATACCAAGCGACAGCTTGGCGATTCTGAAC  
TGCTTCAATTTCTCCCTTATTCAGGACTTGTAGAGAAATCATTAAGTGAATGGACTTCAGGGGGAGTATGGTCACAAGG  
CTGAAACTTAAAGGAATGACGGAAGGGCACACCAGGAGTGGAGCCTGCGGCTTAATTTGACTCAACACGGGAAAACTTA  
CCAAGCCGAAAGGTTAAGGAATGACAGGTTACTGGGCTTTTATGATTCATCGGGAGTGGTGCATGGCCGTTCTTAG  
TTCCGTGGACTGATTTGCTGCTGCTGCTGCTGCTGCTGCTGCTGCTGCTGCTGCTGCTGCTGCTGCTGCTGCTGCTGCTGCT  
GGTGGTCTGCTTACTATCCGCAAGGATGGCTGAAGAGTTTATCTTCTGACTTCTTAAAGGGACACATCTTCAACGT

TCTCGTATGTTTACTGGGTTCTCAGAGCAATCTGTTGATCCTAGACAAATGTCCGGAAAAAGAGAAGGAAGCGTCAAG  
CAATAACAGGTCGTGATGCCCCTAGACATCTTGGGCTGCACCGTGTACAATGAAAGTACTAACGAGTTTTTCGCTGTT  
TGGGGTGGTAATGAGTTTCGCAACTAATTTGCTATTTGGCAGGCAGCAATTTCCAAGTCCGAAAGGCACAGGCAAGCTCTA  
ATGTCTTTTATTTAATCTTGTACTGGGATGAATGATTGGAATATTTGTTCTGAAACAAGGAATTCCTTGTAAAGCGCAAGT  
CATTACCTTTGCGTGAATTAAGTCCCTGCCTTTGTACACACCGCCCGTCCGCTCCTACCATTGAATAAAGAGGTGAAATC  
TCAGGATTTGGTGGCTTGCATTTGGGAGAATGAGAGTAAATCTCTTTGTTTGTAGGGAAGGAGAAGTTCGTACCAAGGTTT  
CCGTAGGTGAACCTGCGGAAGGATCA

>KF250434 - Entamoeba gingivalis strain E 18S ribosomal RNA gene, partial sequence  
TGTAGAAATGAAATACATTTTGCAAGGAATCAATGAAATATCTGATCTATCAACTAGTTGGTAGTATAGAGGACTACC  
AAGGTTATAACGGATAACGAGAAATTAGGGTTTGACATCGGAGAAGGAGCTTTCAAAAATGGCTACTACTTCTAAGGAAGG  
CAGCAGGCGCGTAAATACCCACTTTTAAACAGAAAGAGGTAGTGACGACAAAATAACTCTATTCTTTAAACAAAAGAAATG  
AAGGAATGAACGGAACTACATAGTTTTGTGAAAGCAATTTGGAGGGCAAGTCTGGTGCAGCAGCCGCGGTAATTCAGC  
TCCAATAGTATATATAAAGTTGTTGTGATTAAGGCTCGTAGTTGAATGAAGATACATTGAAAAGGCTTTTCTTTT  
ATACAAAAGAGAAGTTTGTAAACAATAGAAGAAGGAAATGGATTACTTTGAATAAAAATAGAGTGTTTAAAGCAAAAC  
AATGTTAATGAATAATGAAGCATGGGACAATAAGAAGGAGATTTGAAAAGGATTTTCGAGAAGAAGATTAAGGAATAAT  
GGGTAATTTAGAAAAGATGGGAGAGGTGAAATCCATGATCATCTTTAGATAAACGAGAGCGAAAGCATTTTACT  
>AB426549 - Entamoeba histolytica gene for 18S ribosomal RNA, complete sequence  
TATCTGGTTGATCCTGCCAGTATTATATGCTGATGTTAAAGATTAAGCATGCATGTGTAAGTATAAAGACCAAGTAGGA  
TGAACCTCGGACGGCTCATTATAACAGTAATAGTTTCTTTGGTTAGTAAAAACAAGGATAGCTTTTGTGAATGATAAAG  
ATAATACCTTGAGACGATCCAGTTTGTATAGTACAAAATGGCCAAATTTATTTAATGAATTGAGAAATGACATCTAAGT  
GAGTTAGGATGCCACGACAATGTGAACACACAGTGTTTAAACAAGTAACCAATGAGAATTTCTGATCTATCAATCAGTT  
GGTAGTATCGAGACTACAAGATTATAACGATAACGAGGAATTTGGGTTCCGACATCGGAGAGGGAGCTTTACAGATGG  
CTACCCTTCTAAGGAAGGCAGCAGGCGCGTAAATACCCACTTTTGAATTAAGAGGTAGTGACGACACATAACTCTAG  
AGTTGAGTAAAATCAATCTTGAAGGAATGAGTAGGAGTAAATCTCTACGAAATCAATGGAGGGCAAGTCTGGTGC  
CAGCAGCCGCGTAAATCCAGCTCCAATAGTGTATATAAAGTTGCTGTGATTAACCGCTCGTAGTTGAATTAATGTT  
GATTTTATAGGATTTGAAAGTTTGCATAAGTAAAGTTTCTAGAAAATGTTAAATTAATCAAAAGGAAACAATTTCAA  
GTAATTGAGTTGTTATTACTTTGAATAAAAATAGGTGTTTAAAGCAAAAACATTATGTTAATGAATATCAAGCATGGGAC  
AATGCTGAGGGGATGTCAATAAGACATTTTCGAGAGAAGGATTAAGGAACAATTTGGGTTGATTCAGAAAATACGGGAG  
AGGTGAAAATCCATGATCGCTATAAGATGCACGAGAGCGAAAGCATTTCACTCAACTGTGCCATTAATCAAGAACGAAA  
GTTAGGGGATCGAAGACCATGATACCGTCCGTAGTCCATAAACCGATGTAACCAAGGATTTGGATGAATTCAGAA  
TGTACAAAGATGAAGAAGCATTTGTTCTTAATCTGAGTATATCAATATACCTTGTTCAGAACTTAAAGAGAAATCTTGA  
GTTTATGGACTTCAGGGGGAGTATGGTCAACGGCTGAAACTTAAAGGAATTGACGGAGGGCACACCAGGAGTGGAGCC  
TGCGGCTTAATTTGACTCAACACGGGAAAACCTTACCAAGACCGAACAGTAGAAGGAATGACAGATTAAGAGTTCTTTCAT  
GATTTATGGGTTAGTGGTGCATGGCCGTTCTTAAAGTTGGTGGAGTATTGTCAGGTTAATTCGGTAAACGACGAGACTG  
AAACCTATTAATTAGTTTTCTGCCTATAAGACAGAAATGTTCCGCAAGAACAGGTGCGTAAAGTACCCTTCTTAAAGGGAC  
ACATTTCAATTTGCTATTTTAAATGATAGTTATCTAATTTTCGGTTAGAGCTCTTTTAAAGTGGGAAAAAGAAAAGGAAAG  
CATTCAGCAATAACAGGTTCTGTGATGGCCCTTAGACATCTTGGCCGACGCGCGCTACATGGAGTTACTAGAGAGCAT  
TTATCATTTTACCTTTATTTAGGCTTTGTCTAATAATTAAGGATAGTGTGGTGTACCAGATTTGAAAATAGTTAAG  
GAAAACCTCAAAGAACGTACATGACAGGGATAAATGATTTGGAATATTTGTTTGAACGAGGAATTCCTTGTAAATATCGA  
GTCATTAACCTCGAGATGAATACGCTCCCTGCCCTTTGTACACACCGCCCGTCCGCTCCTACCATTGAATAAAGAGGTGAAA  
TTCTAGGATTTCTGTCTTATAGATAGAAAATGGATTTAAATCTCCTTATTTAGAGGAAGGAGAAGTTCGTACCAAGGTTT  
CGTAGGTGAACCTGCGGAAGGATCAT

>KP722600 - Entamoeba dispar isolate ED\_IQ5 18S ribosomal RNA gene, partial sequence  
ATCTGGTTGATCCTGCCAGTATTATATGCTGATGTTAGAGATTAAGCCATGCATGTGTAAGTATAAAGACCAAGTAGGAT  
GAACTCGCGACCGCTCATTATAACAGTAATAGTTTCTTTGGTTAGTAAAGTACAAGGATAGCTTTGTAATGATAAAGA  
TAATACTTGAGACGATCCAATTTGTATTAGTACAAAGTGGCCAAATTTATGTAAGTAAATTTGAGAAATGACATCTAAGTG  
AGTTAGGATGCCACGACAAATTTGAGAACACACAGTGTTTAAACAAGTAACCAATGAGAAATTTCTGATCTATCAATCAGTTG  
GTAGTATCGAGGATACCAAGATTATAACGGATAACGAGGAATTTGGGTTCCGACATCGGAGAGGGAGCTTTACAGATGGC  
TACCCTTCTAAGGAAGGCAGTACCGCTGAAATTTACCCTTTGCAATTTGAAGAGGTAGTGACGACACATAACTCTGAG  
GTTGAGTAAAATCAATTTGAAAGGAATGAGTAGGAGTAAATTTCTCTACGAAATCAATTTGGAGGGCAAGTCTGGTGCC  
AGCAGCCGCGGTAATCCAGCTCCAATAGTGTATATAAAGTTGCTGTGATTAACCGCTCGTAGTTGAATTAATGATG  
ATTTTATACATTTTGAAGACTTTANNTAAGTGAAGTTTCTAGAAATGTTAAATTAATCAAGAAGGAGACNNTTCAAG  
TAATTTAGTTGTTATTACTTTGAATAAAAATAAGGTGTTTAAAGCAAAAACATTTGTTAATGAATATTTGAGCATGGGACA  
ATGCTGAGGGGATGCAATTTAGACATTTTCGAGAGAAGGATTAAGGAACAATTTGGGTTGATTCAGAAAATAACGGGAGA  
GTTGAAAATCCATGATCGGTATAAGATGCACGAGAGCGAAAGCATTTCACTCAACTGGGTTCCATTAATCAAGAACGAAAG  
TTAGGGGATCGAAGACGATCAGATACCGTCCGTAGTCCATAACTAAGCATGTCACCAAGGATTTGGATGAAATTCAGAT  
GTACAAAGATGAAGAAACATTTGTTCTAAATCCAGTATATCAATACTACCTTGTTCAGAACTTAAAGAGAAATCTTGTAG  
TTTATGGACTTCAGGGGAGTATGGTCAACAGGCTGAAACTTAAAGGAATTTGACGGAAGGGCACACCAGGAGTGGAGCCT  
CGCGCTTAATTTGACTCAACACGGGAAAACCTTACCAAGACCGAACAGTAGAAGGAATGACAGATTAAGAGTTCTTTCATG  
ATTTATTTGGTGTAGTGCATGGCCGTTCTTGTAGTTGGAGTATTGTCAGGTTAATTTCCGGTAAACGACGAGACTGA  
AACCTATTAATTAGTTTTCTGCCTATAAGACAGAAATGTTTCGCAAGAACAGGTGCGTAAAGTACCCTTCTTAAAGGGACA  
CATTTCAATTTGCTTATTTAATTTGTTAGTTATCTAATTTTCGATTAGAACCTTTTAAAGTGGGAAAAAGAAAAGGAAAG  
CATTCAGCAATAACAGGTTCTGTGATGCCCTTAGACATCTTGGCCGACGCGCGCTACATGGAGTTACTAGAGAGCAT  
TTATCATTTTACCTTTATTTAGGCTATGTCTAATAGGATAGTAAAGTGTACCGGATGTAAGTGTACCAGATTTGAAAATAGTTAAG  
GAAAACCTCAAAGAACGTACATGACAGGGATAAATGATTTGGAATATTTGTTTGAACGAGGAATTCCTTGTAAATATCGA  
GTCATTAACCTCGAGATGAATACGCTCCCTGCC

>Z11976 - S.haematobium gene encoding 18S ribosomal RNA  
AAACTGGTTGATCCTGCCAGTATGCTATGCTCTCAGAGATTAAGCCATGCATGTCTAAGTACATACCTTAAAACGG  
TGAACCCGCAATGGCTCATTAAATCAGCTATGGTCCCTTAGATCGTAAATGCTACATGGATAACTGTAGTAATCTAGA  
GCTAATACATGCCTTGAATCCCTGACCCGCAAGGGAACGGGTGCATTTATAGAACAAGCAATCGGGCGCGCTTCGG  
CTGTGCCCTGACTTCTGTGATGACTCTGGATAACTTACTGATCGCAGTCCGGCTTGTGTCCGGCAGCGGATCTTCAA  
ATGCTGCCCTTCAATTTTGGTAGGTTGCTTACCTTACATGATGATAACGGGTAACGGGGAATCAGGTTTCGATTTCC  
GGAGAGGGAGCTGAGAAATGGTACCACATCAAGGACGGCAGCAGGCGGAAAATTACCCACTCCGGCACGGGGAGG

TAGTGACGAAAAATACGGATACGGGACTCAATTGAGGCTCCGTAATTCGAATGAGTACAATTTAAATCCTTTAACGAGGA  
 CCAATTGGAGGGCAAGTCTGGTCCAGCAGCCGGGTAATTCAGCTCAGAAAGCGTATATTTAAAGTTGCTGCAGTTAAA  
 AAGCTCGTAGTTGGATCTGGGCTGCGGTCGATGCGGCTGCTTGTTCACGGTTTTGGTTACGATCAGGACGCTGTCAG  
 CTCGGTGTAGTGGCTGTGCGACCTTTACGCCGTGTCTGTGTTAAACGGGTGCTGGTGGGTTGACGAGTTCGTCTTGTGGA  
 CCTGTCGGCATGCTTCCGGATGCCTTTAAACGGGTGCTGGGAGCGGACGGCATCTTACTTTGAACAATTTGAGTGCCTC  
 AAAGCAGGCTGTGCGCCTGAAAATTTTCATGGAATAATGAAATAGGACTTCGGTCTATTTTGTGGTTTTCCGGATC  
 CGAAGTAATGGTTAAGAGGGACAGACGGGGGCATTTGTATGGCGGTGTAGAGGTGAAATTCGGGATCGCCCGCAGACA  
 AACTACAGCGAAAGCATTGCAAGAAATGTTTTATTGATCAGGAGCGAAAGTTCAGAGTTCGAAAGCAGATCAGATACCG  
 TCGTAGTTCTGACCATAAACAATGCCGACTGATGATCCGCGTTGGTCTATAAATTGACATCGCAGGCAGTCCCGGGAAA  
 CCTTAAAGTCTTTGGGCTCCGGGGGAGTATGGTTGCAAGCTGAAACTTAAAGGAATGACGGAAGGGCACCACCAGGA  
 GTGGAGCTGCGGTTTAAATTCGACTCAACACGGGAAAACCTACCCGGCCCGGACACTGTGAGGATGACAGATGATAGC  
 TCTTTCTTGATTCGGTGGGTGGTGGTGCATGGCCGTTCTTAGTTGGTGGAGCGATTTGTCTGGTTAATTCGGATAACGAA  
 CGAGACTTTAACTGCTAAATAGTAGACTGGTCTCTGTGCTCGTTTAGGGCGCGGCTTCTATTTGCTTCTTTATGGAGTA  
 GTGTGGTCTGATCCGGCGGTGCGGTGCCAGTTTTACTTCTTAGAGGGACAAGCGGCACACTTAAGTCGCACGAAATTT  
 GAGCAATAACAGTCTGTGATGCCCTTAGACTCCGGGGCCACACGCTGCTACAATGACGGTGCAGCGAGTCCGGAA  
 CCTGGCCCGAAAGGTTGGGCAAACTGTTTCATCACCGTCTGACTGGGATCGGGGCTTGAATTTATCCCGGTGAACGA  
 GGAATTCCTGGTAAAGTGAAGTATAAGCTTGCCTGATTTACGCTCCCTGCCCTTTGTACACACCGCCGCTCGCTACTACC  
 GATTGAATGGTTTGTAGGTCGTTGGATTGGTGTCTGTGATGTCGCTTGGCTGCTTCCGCTCGACTGATGCTGAGAAGATGACCT  
 AATTTGACTATTTAGAGGAAGTAAAAGTCGTAACAAGTTTTCCGTAAGTGAA  
 >AY618266 - Blastocystis hominis isolate 989 18S ribosomal RNA gene, partial sequence  
 GGAAGCTTATCTGGTTGATCCCTGCCAGTAGTCATACGCTCGTCTCAAAGATTAAGCCATGCATGTGTAAGTGTAAATATC  
 AAGTTTGGAACTGCGAATGGCTCATTATATCAGTTATAGTTTATTTGGTGAAGTACTACTTGGATAACCGTAGTAAT  
 TCTAGGGCTAATACATGAGAAAGTCTCTGGTGGGTTGTTTTATTAGAATGAAAACCATATGCTTCCGGCATGATAGTGA  
 GTAATAGTAACTTATCGTATCGATGCTTAATGTAGCGATGAGTCTTCAAGTTTCTGCCCTATCAGCTTTCGATGGTGA  
 TATATGGGCTACCATGCGAGTAAAGGGTAACGAAAGAAATTTGGGTTGATTTCCGGAGAGGGAGCCTGAGAGATGGTACCA  
 CATCCAAGGAAGCGCAGCGGCTAAATACCACCTGCACACAGGAGGTTAGTACAATAAATACAATGCGGGACT  
 ATACGCTTTGCAATTGGATTGAGAACAATGTACAACCTTATCGATAAGCCATTGGAGGGCAAGTCTGGTGCAGCAGCC  
 CGCGTAATTCAGCTCCAATAGCGTATATAACGTTGTGTCAGTTAAAAGCTCGTAGTTGAAGTGTGGGTGATCGCTGT  
 TGTGAGACTTCGGTCTCTCGACAGTAAGTCACCCCTTCCAGTATCCAGTAGTGGGTATTCACTTACTTACTATTGTGTG  
 TTGGTCCCTTACTGTGAGAAAATTAGAGTGTTCAAAGCAGCGCTTGGCTTGAATAGATTAGCATGGAATAAATTAAG  
 GCTTTCGTGTTGATTGATTGGTTGTTTCATGGAAGCAAGTTAAAAGAACAGTTGGGGTATTCAATTCAGTAGTT  
 AGAGGTGAAATTCGCGATTTATGGAAGATGAACAAGTGCAGAAAGCATTTACCAAGGATGTTTTCATTAATCAAGAACGA  
 AAGCTAGGGGATCGAAGAGGATTAGATACCCTCGTAGTCTTAGCTATAAACGATACCGACTAGGGGTAGTAGAGGTCAA  
 AGTGTCTTTATTAGTACCTTATGAGAAATCAAAGTCTTTGGGTTCCGGGGGAGTATGGTCCGAAGGCTGAAACTTAAAG  
 GAATTGACGGAAGGGCACCACCAGGAGTGGAGCCTGCGGCTTAATTTGACTCAACACGGGAAACTTACCAGGTCCAGAC  
 ATAGGAAGGATTGACAGATTGATAGCTTCTTCTGATTTATGGTGGTGGTGCATGGCCGTTCTTAGTTGGTGGAGTGA  
 TTTGTCTGGTAAATTCGATAACGAAAGCAGACTCCGCTTTAACTAGTACGTTGATTTGTTGATATGCTTGGTCTTCTTAT  
 AGGACACTATAATGTAATAATGAGGAAAGTGGAGGCAATAACAGTCTGTGATGCCCTTAGATGTTCTGGGCTGCACGC  
 CGCGACACTGATCTATTCAACGAGTGGTGGTTCGAGAGACTTGGCAAACTTGTGAAAGTAGATCGTGGATGGGATG  
 ATGCTTGAATTTGTTATCATGAAAGGAAATTCCTAGTAAACGCAAGTCACTAACTTGCATTGATTACGTTCCCTGCCCT  
 TTGTACACACCGCCGCTGCGACTACCATTGATGGTCCGGTGAACACTTTGGATTGAGATTGGTTGTCTGTAAAAGG  
 ATGGTAAATCTGGGAGAAGTCTGTAAATCTTATCATTTAGAGGAAGTGAAGTCTGAACAAGGTTTCCGTAGGTGAACC  
 TCGGAAGGATCAGGATCCC  
 >STDRG18S - Strongyloides stercoralis 18S ribosomal RNA gene, complete cds  
 ACCTGGTTGATCCTGCCAGTGCATATGCTTGTCTCAAAGATTAAGCCATGCATGTAAAGTATAAAACAAATTCATACT  
 GTGAAACTGCGAATGGCTCATTAAATCAGTTATAGTTTATTTGATGGTTTCTTGTACATGGATAACTGTGGTAAATCTA  
 GAGCTAATACATGCTKAAAGCCCGACTTCTGGAAGGGGTGATTTTATAGATAAAAAACCAATGACTTCGGGCTCCTT  
 GGTGATTCATAATAACTTCTCGAATCGCATGGCCTTGCAGCGGCGATGCTTCAATCAAATTTCTGCCCTATCAACTTTCG  
 ATGGTAGGATAGTGGCTTACCATGGTATCAACGGGTAACGGGAAATTAGGGTTCGATTCGGAGAGGGACCTGAGAA  
 GGTACCACATCCAAGGAAGGCAGCAGGCGGAAAATTAACCAATTTTAGTTAAAAGAGGTAGTGACGAAAAATGACAAC  
 CAAATATTATTATTAATATTGGATTGAAAATCTTCAAGTTTAAATMACCTTGTGGTAAAGGAAAGGGCAAGTCTGGTG  
 CCAGCAGCCGGTAATACCAGCTTCCAAAGTGCATAAAATGATTTGTGTGGTAAAAGCTCGTAGTTGGATTATAAAG  
 ATTTGATAAATGACATCTTGGATGTTATTTAATCATTATCATCTTATATTTTTTATTATATAGAAAATAATAATAACTG  
 TCACTTTGAATAAATCAGAGGTTTAAACCAGACATTAATGTTTGTATGGTCTAGCATGGAATAACACTATAGAAAAAT  
 TTAGTGTGGTTTCACTTAATTTTCATGATTAATAGGAACAAACGGGGCATTTCGATCGCTACGTTAGAGGTGAAATTC  
 TTGGACCTGACGAGACTTCTACTGCGAAAGCATTGCGCAAGAATGTTTTCAATTAATCAAGAACGAAAGTTAGAGGTT  
 GAAGGCGATCAGATACCGCCCTAGTTCTAACCGTAAACTATGCTACTAGATGATGAATTATTAGTTATAATTTATTTAT  
 GCATCTTCTCGGAAACGAAAGTCTTTCGGTTCGGGGGAGATGAGTTGAAAAGCTGAAACTTAAAGGAAATTGACGGAAG  
 GCACCACCAGGAGTGGAGCCTGCGGCTTAATTTGACTCAACACGGGAAAACCTACCCGGCCGGACACTATAAGGATTGA  
 CAGATTGATAGCTCTTTCATGATTTAGTGGTTGGTGGTGCATGGCCGTTCTTAGTTCTGGATATTTGCTGGTTGA  
 TTCCGATAACGAGCGAGACTTTTATGTTATATTAATAATAATTTTGTTTATTTTAAATAAAATAAATAATTTTAA  
 TAACAGATTAATAGTGTAACTTATTTGAGAGAGAGCGATAACAGGTCTGTGATGCCCTTAGATGTCGGGGCTGCACGC  
 CGCTACAATGTAGTGCATTTATGTTCTGTTTAGAGATAAATGGGTAACATTTGAAAACATTAACGTAACCTGGCTCCCT  
 AATTTGCAATTAATTTTTCATGAACGAGGAATTCAAAGTAAACGTAAGTCAACTTAGCTTACATGATTACGTTCCCTGCCCT  
 TGTACACACCGCCGCTGCTGCCGGAAGTGCAGCAATATCCAGAGGCAGGAAGAGATGTAATAAATTTTAAATTTT  
 ATATTAATCCTTCCAATCGCTGTTGTTGAAACGGGCAAAAGTCGTAACAAGTTTTTCGTAGGTGAACCTGCAGAAGGA  
 TCATCA  
 >AF222998 - Cryptosporidium parvum 18S ribosomal RNA gene and internal transcribed spacer 1,  
 complete sequence; and 5.8S ribosomal RNA gene, partial sequence  
 AACCTGGTTGATCCTGCCAGTAGTCATATGCTTGTCTCAAAGATTAAGCCATGCATGTCTAAGTATAAACTTTTATACGG  
 TTAACCTGCAATGGCTCATTATAACAGTTATAGTTTACTTGAATACTTTTACTTACATGGATAACCGTGGTAAATCTA  
 GACTAATACATGCGAAAAAACFCGACTTTATGGAAGGTTGATTTTATAGATAAAGAACCAATATAATTTGGTGCATCA  
 TAATACTTTACGGATCACAATTAATGTGACATATCATCAAGTTTCTGACCTATCAGCTTTAGACGGTAGGGTATTGGC

CGACCGTGGCAATGACGGGTAACGGGGAATTAGGGTTCGATTCGGAGAGGGAGCCTGAGAAACGGCTACCACATCTAAG  
GAAGGCAGCAGCGCGCAAAATACCAATCCTAATACAGGGAGGTAGTGACAAGAAATAACAATACAGGACTTTTGGTT  
TTGTAATGGAAATGAGTTAAGTATAAACCCCTTACAAGTATCAATGGAGGGCAAGTCTGGTCCAGCAGCGCGGTAA  
TCCAGCTTCAATAGCGTATATTAAGTTGTTGCAGTTAAAAAGCTCGTAGTTGGATTCTGTAAATAATTTATATAAAA  
TATTTTGTGAAATTTTATATAATATTAACATAATTCATATTACTATTTTTTTTTTAGTATATGAAATTTTACTTTGAGA  
AAATTAGAGTGCCTAAAGCAGGCATATGCCTGAATACTCCAGCATGGAATAATATTAAGATTTTTATCTTTTTTATATG  
GTTCTAAGATAAAGATAATGATTAAATAGGACAGTTGGGGCATTTGTATTTAACAGTCAGAGGTGAAATCTTTAGATTT  
GTTAAAGACAAACTAATGCGAAAGCATTGCGCAAGGATGTTTTTCATTAATCAAGAACGAAAGTTAGGGGATCGAAGACGA  
TCAGATACCGTCTAGTCTTAACCATAACTATGCCAAGTAGAGATTGGAGGTTGTTCTTACTCCTTACAGCACCTTATG  
AGAAATCAAAGTCTTTGGGTTCTGGGGGGAGTATGGTCGCAAGGCTGAAACTTAAAGGAATTGACGGAAGGGCACCACCA  
GGAGTGGAGCCTCGCGCTTAATTTGACTCAACACGGGAAACTCACCAGGTCCAGACATAGGAAGGGTTGACAGATTGAT  
AGCTCTTTCTTGATTCTATGGGTGGTGGTGCATGGCCGTTCTTAGTTGGTGGAGTGATTTGTCGGTTAATCCGTTAAC  
GAACGAGACCTTAACCTGCTAAATAGACATAAGAAATATATATTTTTTATCTGTCTTCTTAGAGGGACTTTGTATGTTT  
AATACAGGGAAGTTTTAGGCAATAACAGGTCTGTGATGCCCTTAGATGCTGGGCGCGCGCGCTACACTGATGCAT  
CCATCAAGTATATATTTCTGTTTTCGAAAGGAAATGGGTAATCTTTGAATATGCATCGTGATGGGGATAGATCATTGCAAT  
TATTGATCTTGAACGAGGAATTCCTAGTAGCGCAAGTCATCAGCTTGGCTGATTACGTCCCTGCCCTTTGTACACACC  
GCCCGTCCCTTACCATTGAATGATCCGGTGAATTTTCGACCATACTTTGTAGCAATACATGTAGGAAAGTTTTCG  
TAAACCTATCATTTAGAGGAAGGAGAAGTCTGTAACAAGTTTCCGTAGGTGAACCTGCGGAAGGATCATTCTTATTTGA  
GAAATGATTTTTGATATATTATATTATATTATATTATATTATATTATATTATATTATATTATATTATATTATATTAT  
AAATGAACATGAACAAAAAGAAATTTAATTTTGTATTATATAATATAAGATTATTTTATTTTATTTTATTTTATTTCTT  
TTTAAATATATTTAAAAGAAAAGAAAATATAATAAAATAATAAAAGTAGAAATAACATTTTGTCTTTTATTTTATTTTAT  
TTTATATATATAAAAATATTATTTTATGTTATATAATAAAGAAAATAATAATATATATATATATATATATATATAAATAA  
TTTGTAAATATAATAAAAATATTTTAAAAAACAATATAAAAATATTTGTCAATTTTCTTTTCTACTTTTCTTTTCTTTT  
TTTTTCTTTTGTCTTTTCTTTTCTTTTCTACTTTTGAATTAAGAGAAAAAATAAAAAAGTAAAGTTTAAAAAAA  
AAAAAAGTTTATGAAAAATAAAAATAAAAATAAATAACCTAACACTTAAAGTAAATGGATGCTTGGTCTCATAACCGA  
TGAAGAACGCAGCAAAAACG

>DQ286403 - *Cryptosporidium hominis* 18S ribosomal RNA gene, partial sequence  
GTTGATCTGCCAGTAGTCATATGCTTGTCTCAAGATTAAGCCATGCATGTCTAAGTATAAACTTTTATACGGTTAAAC  
TGCGAATGGCTCATTATAACAGTTATAGTTTACTTGTATAATCTTTTACTTACATGGATAACCGTGGTAATCTAGAGCTA  
ATACATCGCAAAAAAAGTACTTATGGAAGGGTGTGATTTATAGATAAAGAACCAATATAAATGGTGACTCATAAATA  
CTTTACGGATCACAATTAATGTGACATATCATTCAAGTTTCTGACCTATCAGCTTTAGACGGTAGGGTATTGGCTACCG  
TGGCAATGACGGGTAACGGGAAATTAGGGTTCGATTCCGGAGAGGGAGCCTGAGAAACGGCTACCACATCTAAGGAAGGC  
AGCAGGCGCGCAAAATACCCAATCCTAATACAGGGAGGTAGTGACAAGAAATAACAATACAGGACTTTTGGTTTTGTAA  
TTGGAATGAGTTAAGTATAAAACCCCTTTACAAGTATCAATTTGGAGGGCAAGTCTGGTGCCAGCAGCCGCGGTAATTCAG  
CTCCAATAGCGTATATTAAGTTGTTGCAGTTAAAAGCTCGTAGTTGGATTTCTGTTAATAATTTATATAAAAATATTTT  
GATGAATATTTATATAATATTAACATAATTCATATTACTATTTTTTTTTTAGTATATGAAATTTTACTTTTGAGAAAAT  
AGATGCTTAAAGCAGGCATAGCCCTGAATACTCCAGCATGGAATAAATTAAGATTTTTATCTTTTTTATTTGTTCT  
AAGATAAAGAAATGATTAATAGCAGCTTGGGGCATTTGTTATTTAACAGTCAGAGGTGAAATCTTAGATTTGTTAA  
AGACAACTAATGCGAAAGCATTGCGCAAGGATGTTTTCATTAATCAAGAACGAAAGTTAGGGGATCGAAGACGATCAGA  
TACCGTCTAGTCTTAACCATAAACTATGCCAAGTAGAGATTGGAGGTTGTTCTTACTCCTTACAGCACCTTA

>TOXRRE - *Toxoplasma gondii* 18S ribosomal RNA gene, complete sequence  
TCATATGCTTGTCTTAAAGATTAAGCCATGCATGTCTAAGTATAAGCTTTTATACGGTAAACTGCGAATGGCTCATTAA  
AACAGTTATAGTTTATTTGATGTCTTTACTACATGGATAACCGTGGTAATTCATAGCTAATACATGCGCACATGCCTC  
TTCCCTGGAAGGGCAGTGTATTAGATACAGAACCAACCCACCTTCCGGTGGTCTCAGGTGATTCATAGTAACCGAA  
CGATCCGCTTGGCTTCCGCTCGCAGCGGATCATTCAAGTTCTGACCTATCAGCTTTTCGACGCTATGTTAGGAT  
CGTGGCAGTGACGGGTAACGGGGAATTAGGGTTCGATTCCGGAGAGGGAGCCTGAGAAACGGCTACCACATCTAAGGAAG  
GCAGCAGCGCGCAAAATACCCAATCCTGATTAGGGAGGTAGTGACAAGAAATAACAACACTGGAATTTTCATTTCTAG  
TGATTGGAATGATAGGAATCCAAACCCCTTTCAGAGTAACAATTTGGAGGGCAAGTCTGGTGCCAGCAGCCGCGGTAATTC  
CAGCTCCAAATAGCTTATTTAAAGCTTGTTCAGTTAAAAGCTCGTAGTTGGAATTTCTGGAAGCAGCCAGCTCCGCTC  
TCAGGGTGTGCACTTGGTGAATTTCTAGCATCCTTCTGGATTTCTCCACACTTCAATTTGTGGAGTTTTTTCCAGGACTT  
TTACTTTGAGAAAATAGAGTGTTCAGCAGCTTGTGCCTTGAATACTGCAGCATGGAATAATAAGATAGGATTTTCGG  
CCCTATTTTGTGGTTCTTAGGACTGAAGTAAATGATTAATAGGGACGGTTGGGGCATTCGTATTTAACTGTCAAGGTTG  
AAATCTTAGATTTGTTAAAGACGAACACTACTGCGAAAGCATTGCGCAAGATGTTTTCTAATAATCAAGAACGAAAGTTAG  
GGCTCGAAGACGATCAGATACCGTCTGATCTTAACCATAAACTATGCCGACTAGAGATAGGAAAACGTCATGCTTGAC  
TTCCTCCTGCACCTTATGAGAAATCAAAGTCTTTGGGTTCTGGGGGAGTATGGTCGCAAGGCTGAAACTTAAAGGAATTTG  
ACGGAAGGCACCCAGCGCTGGAGCCTGCGGCTTAATTTGACTCAACACGGGGAACCTCACCAGTCCAGACATAGGA  
AGGATTTGACAGATGATAGCTCTTTCTTGATTCTATGGTGGTGGTGCATGGCCGTTCTTAGTTGGTGGAGTGATTTGTC  
TGGTAAATFCCGTTAACGACGAGACCTTAACCTGCTAAATAGGATCAGGAACCTTCGTGTTCTGTATCACTTCTTAGAG  
GGACTTTGCGTGTCTAACGCAAGGAAGTTTGGGCAATAACAGGCTGTGATGCCCTTAGATGTTCTGGGCTGCACGGCGC  
GCTACACTGATGCATCCAACGAGTTTATAACCTTGGCGGATAGGTCTAGGTAATCTTGTGAGTATGCATCGTATGGGGA  
TAGATTATTGCAATTAATATCTTCAACGAGGAATGCCTAGTAGCGCAAGTCAGCACGTTGCGCCGATTACGTTCCCTGCC  
CTTTGTACACACCGCCCTGCGTCTTACCGATTGAGTGTTCGGTGAATTTTCGGACCGTTTTGTGGCGGTTTCGTGCC  
CGAAATGGGAAGTTTTGTGAACCTTAACACTTAGAGGAAGGAGAAGTCGTAACAAGGT

>FJ236336 - *Eimeria maxima* clone 158-43 18S ribosomal RNA gene, partial sequence  
TAGTCATATGCTTGTCTCAAAGATTAAGCCATGCATGTCTAAGTATAAACTTTTATACGGTAAACTGCGAATGGCTCAT  
TAAACAGTTATAGTTTATTTGATGGTCTTTTTTACATGGATAACCATGGTAATCTATGGCTAATACATGCGCAAAAAGC  
TACCTCGTTGGAGGAGCTGTGTTTATAGATACAAAACCAACCCACTTGTGTTGGAGTCTTGGTGAATCATAGTAACCG  
AACGGATCGCAGTTTGCCTTCCGGCTCGGATGGATCAATCAAGTTTCTGACCTATCAGCTTTCCGGCAGTGGGATTTGG  
CCTACCGTGGCAGTGACGGGTAACGGGGAATTAGGGTTCGATTCCGGAGAGGGAGCCTGAGAAACGGCTACCACATCTAA  
GGAAGGCAGCAGCGCGCAAAATACCCAATGAAACAGTTTTCAGGATGAGCAGAAATAACAATACAGGGCATTATTA  
GCTTTGTAATTTGGAATGATGGAAATGTAACCCCTTCCAGAGTAAACAATGGAGGGCAAGTCTGGTCCAGCAGCCGCGG  
TAATTCAGCTCAATAGTGTATATTAGACTTGTGCGTAAAAAGCTCGTAGTTGGATTTCTGCTGGTTCAGCCGTG  
GCTGCCCTGATGGGTGTGCGGTTGGTTGCCCTCGGCATCTTCCGGTAGCTTGTGGCGCTTAAATGCGTCTGCAAGTGT







CGATGCAAAGATTAGGCCATGCAAAGGGTAAGCCATGCAAAGATTATCACATGCCCTTCGGGTGTAGTTTGGCTGATTCTAA  
ATAACGCTGCATATCGGGCGGCTTGTCCGCCGATATTCGAAAAAGTGTCTGCCCTATCAACCTGATGGTAGTCTATTAGT  
CTACCAGTGTATTACGGGTAACGGGATAAAGGGTTCGACTCCGGAGAGGGAGCCTTAGAAAACGGCTACCACATCCAAG  
GAAGGCAGCAGGCGCGTAACCTTATCCACTCTTGAAGAGATGAGATAGTGACTAAAAATAAAAAGACCATTCCATGGAAC  
GGTCATTTCAATGAGTTGATCATAAACCTTTTTTCGAGGATCAAGTGGAGGGCAAGTCTGGTGCCAGCAGCCCGGTAAT  
TCCAGTCCACTAGTGTAAATCGTCATTGCTGCGGTAAAAAGCTCGTAGTTGGATCTGAGTCGCATGCAGTGGTTCGCC  
TTTTGGCGTTAATCGCTGTGCGACTATTGCTGTTTTCTACTGAAGTTTCGGCTCTTTAGTGGCTAGCGAGTTACTT  
TGAATAAATTAGAGTGCTCAGAACAAGCGTTTGGCTTGAATGCTCGATCATGGAATAATAAAAAGAGGACTTCGGTTCTATT  
TATTTGGTTCAGGAACTGAAATAATGGTTAAGAGGGACAATTCGGGGGCAATTCGTATCCCTGCGCGAGAGGTGAAATTCGT  
GGACCGCAGGGGACGCCCTAAAGCGAAAGCATTTGCCAAGAATGCTTTCATTAATCAAGAACGAAAGTCAGAGGTTTCGA  
AAGCGATTAGATAACCGCCTAGTTCGTACCGTAAACTATGCCATCTAGCGATCCGATGGGGTATTGTTGCCTTGTGCGAGG  
AGCTTCCCGGAAACGAAAGTCTTTCCGGTTCCTGGGGTAGTATGGTTGCAAAGCTGAAACTTAAAGAAATTGACGGAATGG  
CACCACCAGGAGTGGAGCCTGCGGCTTAATTTGACTCAACACGGGAAACTCACCCGCGCCGACACCGTAAGGATTGAC  
AGATTGAAAAGCTCTTCTCGATTGGTGGTGGTGGTGCATGGCCGTTCTTAGTTGGTGGAGCGATTTGTCTGGTTTATT  
CCGATAACGAGCCGAGACTTAGCTGCTAAATAGTGGCTGGATTTTTACGTCCAGTCTACTTCTTAGAGGGATAAGCGGT  
GTTTAGCCGCACGAGATTGAGCGATAACAGGTCGTGATGCCCTTAGATGTCGGGGTGCACGCGCGCTACAATGGAAG  
AATCAGCTGGCCTATCCATTGCCGAAAGGCATTGGTAAACCGTTGAAACTCTTCCGTGACCGGATAGGGAAATGTAATT  
ATTTCCCTTGAACGAGGAATTCCTAGTAAGTGTGAGTATCAGCTCAGCTGATTACGTCCTGCCATTTGTACACACCC  
CCGCTCTGTGTCGGGAAATGAGTGTCTCGAGAGGACTTCGGCTGCTATATCGAGTCTTCGGGTGCGGTTAAGGCGGG  
AAACAGTACGTCGCAAGGGTAG

>AJ920348 - Necator americanus 18S rRNA gene

CGCTATATGCTCAGTTTAAAGATTAAAGCATGCATGTGAGTCTAAAGAGAACTGCGAACGGCTCATTAGAGCAG  
ATGTCACTTATTTCGAAAAGTCCTTTTGGATAACTGCGGCAATTCTGGAGCTAATACATGCGAATAAACCCCTGACTTTTCGA  
AAGGGTGCATTTAGAGCAAAATCAATCATCTTCGGATGTAGTTTGTGACTCTAAATAACGCTGCATATCGCGGGCTT  
GTCGCGGATATTCGAAAAAGTGTCTGCCCTATCAACCTGATGGTAGTCTATTAGTCTACCATGGTTATTACGGGTAAAC  
GGAGATAAAGGGTTCGACTCCGAGAGGGAGCCTTAGAAAACGCTACCACATCAAGGAAGGAGCAGCGGCGCTAACTTA  
TCCACTCTTGAAGAGATGAGATAGTGACTAAAAATAAAAAGACCATTCTATGGAACGGTCATTTCAATGAGTTGATCAT  
AAACCTTTTTTCGAGGATCAAGTGGAGGGCAAGTCTGGTGGCAGCAGCCGCGTAATTCAGCTCCACTAGTGTAAATTCG  
TCATTTGCTGCGGTTAAAAAGCTCGTAGTTGGATCTGAGTCCGATGCAGTATTGCCATTGGCGTTAATCGCTGTTCGGA  
CTATTTGCTGGTTTTCTACTAAAGTTTTCCGGCTTTTTTAAAGTGGCTAGCGAGTTTACTTTGAATAAATTAGAGTGTCTCAGAA  
CAAGCGTTTGGCTTGAATGCTCGATCATGGAATAATAAAAAGAGGACTTCGGTTCATTTATTGGTTTCAGGAACTGAAATAA  
TGGTTAAGAGGGACAATTCGGGGGCAATTCGTATCCCTGCGCGAGAGGTGAAATTCGTTGGACCCGAGGGGGACGCCCTAAA  
GCGAAAGCATTTCGCAAGAATGTCTTCAATTAACAAGAACGAAAGTCAAGGTTTGAAGGCGATTAGATAACCGCCCTAGT  
TCTGACCGTAAACTATGCCATCTAGCGATCCGATGGGGTATTGTTGCCCTTGTGCGAGGAGCTTCGCGAAACGAAAGCTT  
TCGGTTCCTGGGTAGTATGGTTGCAAAGCTGAAACTTAAAGAAATTGACGGAATGGCACCACCAGGAGTGGAGCCTGCG  
GCTTAATTTGACTCAACACGGGAAAACTCACCCGCGCCGGACACCGTAAGGATTGACAGATTGAAAGCTCTTTCCTCGATT  
TGGTGGTTGGTGGTGTGATGACCGGTTCTTAGTTGGTGGAGCGAATTTGTCTGTTTATTCGATAACGAGCAGACTCTAGC  
CTGCTAAATAGTGGCTGATTTTTACGTCCAGTCTACTTCTTAGAGGGATAAGCGGTGTTTAGCCGACGAGATTGAGCG  
ATAACAGTCTGTGATGCCCTTAGATGTCCGGGCTGCACGCGGCTACAATGGAAGAATCAGCTGGCCTATCCATTGCC  
GAAAGCATTGGTAAACCGTTGAAACTCTTCCGTGACCGGGATAGGGAATGTAATTTTCCCTTGAACGAGGAATTC  
TAGTAAGTGTGAGTGCATACGCTGATTAGCTGCCATTTGTACACACCCCGCTGCTGTCCGGGATCGAGC  
TGCTCGAGAGGACTGCGGACTGCTGTGCGGAGGCCTTCGGGTGCGGTTATGGCGGAAACAGTTCAATCGCAATGGCTT  
GAACCGGTAAAAGTCTGTAACAAGGTATCTGTAGGTGAACCTGCAGATGGATCATCG

>AJ287525 - Hymenolepis microstoma 18S rRNA gene

ATCTGCCAGTAGTCATATGCTTGTCTCAAAGATTAAAGCCATGCATGTCTAAGTTCATGCCTTTATACGGTGAACCCGCG  
AATGGCTCATTAATCAGCTATGGTTTATTGGATCGTACTCGTTAAATGGATAACTGTAATAACTCTAGAGCTAATACAT  
GCCACGAAGCCCTGACCCCGCTCGTCCGGGAATGGGTGCACTTATTAGAACAAGGCCAACCCAGTTTATGCATTCCTTCG  
GGGTGTGTGAGCTGTAGCCCTTCTGGTACTCTGGATAAATGTTTACAGATCGCAGTCGGCTTACGTCGGCGACGGGTC  
CTTCAAATGCTCCCTTACCTTTCGATGGTAGGTGACTGCCATACCATGGTGTGATAACGGGTAACCGGGAAATCGGGT  
TCGATTCCGGAGAGGGAGCCTGAGAAACGGCTACCCTTCCAAGGAGGAGCAGCAGGCGCGCAAATACCCACTCCCGGTA  
CGGGGAGTGGTGACGAAAAATACCGATGCGGGACTCATTAACGAGGCTCCGTAATCGGAATGAGTGGACTCTAAATCCT  
TTCACGAGGATCAATGGAGGCAAGTCTGGTCCAGCAGCCGCGTAACTCCAGCTCCAATAGCGTATATTAAGTTGCT  
TGCAGTTAAAAAGCTCGTAGTTGGATCTCGGTAGCATTTGTTGCCCTGCTCAGTTGTCTGCTCTGCGGCGTGCATCATAT  
GTGTTTGTTCATATCCACGCTCTCTCCTGAGGGCCGGGTGTGTTGGCATCGCGGTGGGTGTACATAAAAACCGTAGT  
GTATTGAGCTGGCGTGGCGATGGTGTACCTTTGAGCCATGCTGTGGTCTAACAGCCACAGGTGTAATCGGGTGTCCGG  
CAGTCTGTCTCCTTTTGTGGGCTAGTCCGCTCGGTTGCATGCCAATGAATGCCCTTCAAAGGTTTTCATGGGCGG  
ATGGCACGTTTACTTTGAACAAATTTGAGTGTCAAATCAGGCCGACGTTGCCTGAAAAGTTTTGCATGGAATAATGGAA  
TAGGACTTCGGTCTATTTTCGTTGGTTTTTCGGATCCGAAGTAATGATCAAAGAGACAGGCGGGGACGTTGTATGGTTG  
CGTTAGAGGTGAAATTCATGGCACCGTAGCCAGACAACTAAAGCGAAAGCATTCGTCAAGCATGTTTTCATTTGGCCATG  
AGCGAAAGTCAGAGGCTCGAAGACGATCAGATACCGTCTAGTTCTGACCATAAACGATGCCAATGACGATCCGTGGCG  
GTAGTTTATAAACCCTTCCCACGGGAGTCCCGGAAACCTTAAAGTCTTTGGGTTCCGGGGGAAAGTATGGTTGCAAAG  
CTGAAACTTAAAGGAATTTACGGAAGGGCACCACCAGGAGTGGAGCCTGCGGCTTAATTTGACTCAACACGGGAAACTC  
ACCCGGGCGGACACTATGAGGATTGACAGATTGATAGCTCTTCTTGTGTTGGTGGTGGTGGTGCATGGCCGTTCTTA  
GTTGGTGGAGCGATTGCTGTTGTTTAAATCCGATAACGAAAGGAGTCCAGCTGCTAATTAGTGCATTTGTCCACTGTAC  
CAGCCGAGCGCGCAGTGTCAACTGCTTTGGCTCAGTGTGGATCTGGTGGCTTTGCGCATCTGCGCGGTGCTGTGCTGCC  
TTGTGTGTGTGCTGTGTGGGCTGTGTGCGGCTGCTTGGCTGCATGTTGTGCTCGGGCGGATGACACCAGTGTAGC  
TAGCAGGTGCGGCGCAATGCTTACTTCTTAGAGGACACGCGGGGAGAGCCGACGAAATAGAGCAATAACAGGCTGTG  
GATGCCCTTAGATGTCCGGGCGCACCGCGCTACAATGGGGTGTCAACAGTCAAGCTTCTGGCTGAAAAGGTTG  
GGTAAACTGGTCAATCACCGTATGACAGGATCGGGCTTGGAAATTTTCCCGTGAACGAGGAATTCCTAGTAAGTGC  
AAGTCATAAGCTTGGCTGATTACGTCCTGCCCTTTGTACACACCCCGCTGCTACTACCGATTGAATGGTTTAGTAA  
GGTCTTGGATTGGTGCATTTAGTTCCACCGAAAGGTGAGTATCTAGCCGGTGTGAG

>DQ094173 - Loa loa small subunit ribosomal RNA gene, partial sequence

GCTTGTCTCAAAGATTAAAGCCATGCATGTCTAAGTTCAAATAAACCTATAATGGTGAACCCGGAACGGCTCATTATAAC

AGCTATAATGTACTTGTATGTTGATTATCCAACGTGGATAACTGTGGCAATTCTAGAGCTAATACATGCACCAAAGCTCCG  
ACTTTTGAACGAGCGCATCTATTAGATTAACAACCAATCGGGTTATTAGCCCGTAAATTTGGTACTCTGAATAGCTATGGC  
TGATCGCATGGTCTTGTATCCGGGACGCTATCTATCAAGTGTCTGCTTATCAACTTTTCGATGGTATGTTATGTGCTTACC  
ATGGTTGTAACGGGTAACGGGAGAATAAGGGTTCGACTCCGGAGAGGGAGCCTGAGAAAACGGCTACCACATCCAAGGAAGG  
CAGCAGGCGCGAAATTAACCCACTCTCAGAATGAGGAGGTAGTGACGAAAAAATACGAGACCCGTTCTCTTTGAGGCCGGT  
TATCGGAATGGGTACAATTTAAACCCGTTAACGAGGATCTATGAGAGGGCAAGTCTGGTGCAGCAGCCGGGTAATTC  
AGCTCTCAAAGTGTATATCGCTCATTTGCTGCGGTTAAAAAGCTCGTAGTGGATCTGCGTCTCAGGACCTGGTCCATCCAT  
TGGATGAGAACTGGGCTCCTAGGCTAATATTGCCAGTTTTCCCTACGTTACCTTGATCGGTTGCGTATGGTGGCTAGCAA  
GTTTACCTTGAAAAAATAGAGTGTCAATGCGGGCTAATGCCGAACTACTCGTGCATGGAATAATGAAATAGGATCTCG  
GTTCTATTTTGTGGTTTTCTGATCTGAGATAATGGTTAAGAGGGACGGACGGGGGCATTTCGTATCGCTGCGTGAGAGGT  
GAAATTTTGGACCGTAGCGAGACGTACGACTGCGAAAACATTTGCCAAGAATGTCTTCATTAATCAAGAACGAAAGTCA  
GAGGTTGGAAGGCGATCAGATACCGCCCTAGTTCTGACCGTAAACGATACCAACTAGCGTTCCGTCGGCGGTAATACGC  
CTTGACGGGCGAGCTCCCGGAAACGAAAGTTTTTCGGTTCCGGGGGAAAGTATGGTTGCAAAAGCTGAAACTTAAAGAAAT  
GACGGAAGGGCACCCAGGAGTGGAGCTGCGGCTTAATTTGACTCAACACGGGAAACTCACCTGGCCCGGACACCGT  
GAGGATTGACAGATTGAGAGCTTTTCAATGATTTGCTGGTGGTGCATGGCCGTTCTTAGTTGGTGGAGTGATGTT  
CTGGTTTATTCGATAACGAGCGAGACTCTAGCCTACTAAATAGTTACTGGATAATTTTGTCCAGACAACCTTTAGAGG  
GACAAGCGGTGTTTAGCCGATGAAGTTGAGCAATAACAGGTTCTGTATGCCCTTAGATGTCCAGGGCTGCACGGCGGCT  
ACACTGGAGGAATCAGCTGCTAACCATTACCGAAAGGTAAGTCTGGTAACCCCTTGAAATCCTTCGATCGGGATCGG  
GAATTTGCAATTAATTTCCCTTGAACGAGGAATTCCTAGTAAAGTGTGAGTGCATCAGCTCAGCTTATTAGTCCCTGCCCTT  
TGTACACACCGCCGCTGCTGCCGGGACTGAGCCGTTTCGAGAAAAGCGGAGACTGCTGTTTTGATACCTTTTCGAGGTG  
GAGATTTTGGTGGAAACCGCTTAAATCGCAGTGGCTTGAACCGGGCAAAAGTCTGTAACAAGGTTTCCGTAGGTGAACC  
TGCAGCTGGATCA

>AF473852 - *Giardia intestinalis* small subunit ribosomal RNA gene, complete sequence

CATCCGGTTCGATCTGCCGGAATCCGACGCTATCCCAAGGATACAAGCCATGCATGCCCGCACCCCGAAGCGGGCAG  
ACGGCTCAGGACGACGGTTGACCCCCCGGGCGGTCCTGCTAGCCGGACACCGCTGGCAACCCGGCGCAAGACGTCG  
CGCAAGTGCAGGCGCCCGGGCGAGCAGCGTGCAGCAGCGCCCGCCGGGCTTCCGGGGCATCCCGGATGGC  
GCGGTTGCGGCCCGCATAGGAGCGACGCTGGCGGAGAATCAGGGTTCGACTCCGGAGAGCGGGCTGAGAGACGGCC  
GCACATCAAGGACGGCAGCAGCGCGGAATTCGCCAATGCCGCGCCGCGAGGCGAGCGAGGGGAGCGCACAGAGCGA  
GGCGGGCCACACGCCCCGCGGAGCCGAGGGCAAGGTCTGGTGCCAGCAGCCGCGTAATTCAGCTCGGCGAGCGT  
CGCTGGCGCTGCTGCAATTAACACGCCGCTAGTTGCCCGCCCGCGCGAGGAAAGGGAGCGCTCCAGGCAAGCC  
GTTGGACCCGCGCGGGGACGGCGCTGCGGGCGGGCGCCGCGGAGCCCGAGGAGAGCGGGCGGGGCACTGGTA  
CTGGCCGGGACGGGTGGAAATAGGATGATCCCGCAAGACCGCCGGGGCGAAGGCGTCTGCCAAGACCGCTCTGTCAA  
TCAAGGGCAAGGTGGGGGCTAGAAGGCGATCAGACACCACCGTATTCGACCGTAAACGGTCCGCCCCGCGCCG  
CGCGGCTGCTCCCGCGGCCAGGAAACCGGGAGGCTCCGGGCTCTGGGGGAGTATGGCCCAAGCTGAAACTTG  
AAGCATTGACGGAGGGTACCACAGAGCTGGAGTCTGCGGCTCAATCTGACTCAACGCGTGCACCTACCAGGCCCGG  
ACGCGCGGAGGACCGACAGCCGGGTGCGCTTTTCGCGATCGCGCGGGCGGTGGTGCATGGCCGCTCCAGCCGCTGGCGG  
AGCCGCTGCTCCTCATTGCGACAACGAGCGAGACCCAGCCGGATGCGCGGGACTGCCCGGGAGCGGGGAGGAAGG  
CGGGCGATAGCAGGTCTGTGATTCGCTTACAGCGCCCTGAGCGCCCTGGGCTGCACGCGCGTACACTGGCGGGGACGCGCCG  
CGAGGACGCGGGAGCCCGCGGTGGCCGGGACCGCGGGCTGGAACGCCCGTGCACAGGAATGTCTTGTAGGCGCC  
CGCCACGACCGCGCGCGGACGCGTCCCTGCCCTTGTACACACCGCCGCTGCTCTACCGACTGGCGCGCGGGCGAG  
CGTCCCGGACCGCAAGGGCCCGGAGCCCGCGCTGGAGGAAGGAGAAGTCTGTAACAAGGATATCCGTAGGTGAACCT  
GCAGAAGGATCAAGCTTGGATCCC

>KP875567 - *Halicephalobus gingivalis* isolate 2014-10-972 18S ribosomal RNA gene, partial sequence

GTTATTAGATTAACCAATTTGGGCTCTGCCATATATGTTTACTCTAGATAATGCGCTACCATACAGATTAATTTCTGAT  
GAAATGCCGATTTTGTATCTGCCCTATCAACTATATAACCTGATTGAACCGTTATGGTGTGGCCGGTAACGGAGAA  
TAGGGTTCGCTCTCCGGAGAGAATGCCTTAAAAACGGCTTTTACATCCAAGGAAGGAGCAGGCGGAAAAATACCCACTC  
TCAGTGCCAGGAGGTAGTGACGTGAAATGACAAGTTGCAATTTTATAGGATGGAACATTTGGAATGGTTTTATTTAAAT  
CCATTAAGATTAATCAATGAGAGGGCAAGTCTGGTGCCAGCAGCCGCGGTAATTCAGCTCTCATACTGCATTGAATTC  
TGTTCGGTTAAAAAGTTCTGATTTGCAAGTGTACGATGAGGAGTGGTTCGCTTATTGAGCATATAACTACTCTCGTTA  
AAGGGTTATATGTTGAAAGACATATACTCTAGTTACTTTGAGTAAATCAGAGTGCCTTAGAACAAGCGTATTGCTTGAATG  
GTTGTGCATGGAATAACAATACATGCAATGATTTGTTTTGTTGGTTTTAATGTCAATGAATGATTAAGGAACAAA  
CGGGGCAAAAAGTATCATAGGCGAGAGGTGAAATTCGTGGACCCCTGTGAGACTGCCTAAAGCGAAAGCATT

>AY193874 - *Hymenolepis nana* 18S ribosomal RNA gene, complete sequence

GGCTCATTAATCAGCTATGGTTTTATTGGATCATACTCGTTAAATGGATAACTGTAATAACTCTAGAGCTAATACATGCC  
ACGAAGCCCTGACCCCGGGCTCCCTCGGGGAATGGGTGCACCTATTAGAACAAGGCAACAGCTCTCCGCGTGCATTC  
CTCCTTCGGGAGGTGTGTCGCGGGCTGCAGCACTTCTGGTACTCTGGATAAATGTTACAGATFCGAGTCCGGTCTTACG  
TCGGCGACGGGTCCTTCAATGTCTGCCCTATCAACTTTTCGATGGTAGGTGACCTGCCTACCATGGTATAACGGGTAAC  
GGGAATCAGGGTTTCGATTCGGGAGAGGAGCTGAGAAACGGCTACCACTTCCAGGAGGAGCAGGCGCGCAAAATTA  
CCCCTCCCGGTACGGGAGGTTGGTGACAAAAATACCGATGCGGGACTCATTACGAGGCTCCGTAATCGGAATGAGTG  
GACTCTAAATCCCTTTCAGGAGGATCAATTTGGAGGGCAAGTCTGGTGCCAGCAGCCCGGTAACCTCAGCTCCAATAGCGT  
ATATTAAGTTGCTGAGTTAAAAAGCTCGTAGTTGGATCTCGGTAGCATTGTTGCCCTGCTCAGTTGTCATGCTCTGCGG  
CGTGCATCACATCGTGTGGGTCGGCTGTGCATTGTCCAGCTCCTATGGGGGCTGGGCGTGTGCGCTTGGCTTCATCAG  
GTGGGTGTACAAAAACCCAGTGTATTGAGCTGGCGTGGCGATGGTGCCACCTTTGAGCCATGCTGTGGTGTAAACAG  
CCACAGGTGATGCGAGTGTGCGGAGTGTCTGCAAGCTTCTGAGGAGTGGTTCGCTTATTGAGCATATAACTACTCTCGTTA  
CCTTTAAAGGTGTTTATGGCGGATGGCACGTTTACTTTGAACAATTTGAGTGTCTAAATCAGGCCGATGTCGCTGA  
AAAGTTTTGCATGGAATAATGGAATAGGACTTCGGTTCATTTTCGTTGGTTTTTCGGATCCGAAGTAATGATCAAAAGAGA  
CAGGCGGGGACGTTTGTATGGCTGCGCTAGAGGTGAAATTCATGGACCGTAGCCAGACAACTAAAGCGAAAGCATTCGT  
CAAGCATGTTTTTATTGGCTGAGCAGAAAGTCAAGAGCATCAGATACCTCCTAGTTCTGACCAATAACAG  
ATGCCAATGACGATCCGTGGCGGTAGTTTCTAAACCTTCCCCAGGGCAGTCCCGGAAACCTTTAAGTCTTTGGGTT  
CCGGGGAAAGTATGGTTGCAAGCTGAAACTTAAAGGAATTGACGGAAGGGCACCCAGGAGTGGAGCCTGCGGCTTAA  
TTTGTACTCAACCGGAAACTCACCCGGCCGGACACTGTGAGGATGACAGATTGATAGCTCTTCTTGTATTGGTGG  
TTGGTGGTGCATGGCCGTTCTTAGTTGGTGGAGCGATTTGCTGGTTAATTCGGATAACGAACGAGACTCCAGCTGCCTA  
ATTAGTGCATTTGTCACCTGCACAGCCGAGCGCGCAGTGTCACTGCTCTGGCTCAGTGCAGGACCGGCGGCTTTGT

GCATCCTGCGTGGTGCACCTGCCTCGTGTGGTGTGGCTGTGTGGGGCTATGCGCGCGCTGTTAGGCCATGCATGTTGTGCC  
TGGGGCGGATGGACCAGCTTAGCTAGCAGGTGCGGCGGAAATGCTTACTTCTTAGAGGGACACGCGGGAGAAAGCCGAC  
GAAATAGAGCAATAACAGGTCTGTGATGCCCTTAGATGTCGGGGCCGACGCGCGCTACAATGGCGGTGTCACAGATC  
AGACCTTCTGGCCTGAAAAGGTTGGGCAAACTGGTCAATCACCGTCTATGACAGGGATCGGGGCTTGGAAATGTTCCCGT  
GAACGAGGAATTCCTAGTAAGTGCAGTCAAGCTTGGCTGATACGTCCCTGCCCTTTGTACACACCGCCGCTCGCT  
ACTACCGATTGAATGGTTTAGTAAGGTCCTTGGATTGGTGCCATTTAGGTTCCGCCGAAAAGGTGCGTATCTAGCCGGCC  
CGAGA

>AB544347 - *Eimeria reichenowi* gene for 18S ribosomal RNA, partial sequence, clone: Al\_7\_74

GTATAAGCTTTTATACGGTGAACCTGCGAATGGCTCATAAAAAGTATAGTTTATTGATGGTCACTTTTACATGGAT  
AACCATGGTAATCTATGGCTAATACATGCGCAAAAAGCCACCTTCTTTGGAGGGGAGTGTATTATAGATACAAAACCAA  
CCCACTTTAGTGGAGCCTTGGTATTTCATAGTAACCGAACGGATCGCAATTTGGCTTTTGGCTGCGATAGATCATTCA  
AGTTTCTGACCTATCAGCTTTCGACGGTAGGGTATTGGCTACCGTGGCAGTGACGGGTAACGGGAATTAGGGTTCGAT  
TCCGGAGAGGGAGCCTGAGAAACGGCTACCACATCTAAGGAAGGCAGCAGCGCGCAATTAACCAATGAAAACAGTTTC  
GAGGTAGTGACGAGAAATAACAATACAGGGCATTTAATGCTTTGTAATGGGATGATGGGAATGTA AAAACCTTTAGAG  
TAACAATGGAGGGCAAGTCTGGTCCAGCAGCCGCGTAATTCAGCTCCAATAGCGTATATAGAGTTGTTGACGTTA  
AAAAGCTCGTAGTTGAATTTCTGTGGTGTATCCGGTACCGCTGTATGGTGTGCACCAGGATTGGCTTCGGCATTTCT  
TCCGTAGCTTAATCCCGTAAATGCGTGGATTAGGTTTCCGAACTTTTACTTTGAGAAAAATAGAGTGTTCACAGCA  
GGCTTGTGCTGTAATACTGCAGCATGAATAATAAGATAGGACCTTGGTTCATTTTGTGGTTTCTAGGACTAAGGT  
AATGATTAAATAGGGACATTTGGGGCATTCGTAATTTAAGTGTGACAGGTGAAAATTTTATAGATTGTTAAAGACGAACTAC  
TGGGAAAGCATTTGCCAAGGATGTTTTCATTAATCAAGAACGACAGTAGGGGGTTGAAAGACGATTAGATACCGTTCGTA  
TCTCTACCATAAACTATGCCGATAGAGATAGGAAAATGCCTACCTTGGCTTCTCCTGCACCTCATGAGAAAATCAAAGT  
CTCGGGTTCGAGGGGATAGTGTGCAAGGCTGAAACTTAAAGGAATFGACGGAAAGGACACCAGCGCTGGAGCCGTCG  
CGCTTAATTTGACTCAACACGGGAAAACCTACCAGGTCCAGACATGGGAAGGATTGACAGATTGATAGCTCTTTCTTGA  
TTCTATGGTGGTGGTGCATGGCCGTTCTTAGTGTGGTGGAGTATCTGCTGTGTAATTTTCGTAACGACGAGACCTTA  
GCCTGCTAAATAGGATCTAGAACATATGTTCTGGTATCACTTCTTAGAGGGACTTTGCGTGTCTAACGCAAGGAAGTTT  
GAGGCAATAACAGGCTCTGTGATCCCTTAGATGTTCTGGCTGCACGGCGCTACACTGATGCATCAACGAGTTCAATFA  
CCTTGTCCGGAAGGTCTAGGTAATCTTTGAGTATGCATCGTGTGATGGGATAGATTATGCAATTAATTAATCTTCAACGA  
GGAATGCCTAGTAGGCGCAAGTATCAGCTTGGCCGATTCGCTCCCTGTGCTTTGTACACACCGCCCGTCCGTGCAACC  
GATCGGAGGGTCTGTGAATTCATCGGACTGACCTGTTGGCTTTGTGCTAGCTCGTCGGGA

>KP789172 - *Eimeria fulva* isolate YZ 18S ribosomal RNA gene, partial sequence

GGTGAACCTGCGAATGGCTCATTAACAGTATATAGTTTATTTGATGGTCACTTTTACATGGATAACCATGGTAATTTCTA  
TGCTAATACATGCGCAATGCCACCTTCTCTGGAGGGCAGTGTATTTAGATACAAAACCAACCCACTATATTTGTGGA  
GCTTTGGTGTATCATAGTAACCGAAGTATGCACTTGGCTTCGTGCCCGGATGGATCATCAAGTTTCTGACCTATCA  
GCTTTCGACGGTAGGGTATTGGCTACCGTGGCAGTGACGGGTAACGGGGAATTAGGTTTCGATTCGGAGAGGGAGCCT  
GAGAAACGGCTACCACATCTAAGGAAGGCAGCAGCGCGCAAAATACCAATGAAAACAGTTTCGAGGTAGTGACGAGAA  
ATAACAATACAGGGCATTTATTGCTTTGTAATTTGAAATGATGGGAATGTA AAAACCTTTTCAGAGTAACAATTTGGAGGCA  
AGTCTGGTGCAGCAGCGCGGTAATTCAGCTCCAATAGCGTATATTTAGAGTTGTTGTCAGTTAAAAGCTTCGTAGTTGG  
ATTTCTGTGCGTGTCTGCTGCTGCTGATAGGTGTGAAATTAGGATTGGCTTCGGCATTTTTCCTAGCCTTATGTC  
ACACTTCAGTGTGTGTCATATGTTGTTTCGAACTTTTACTTTGAGAAAAATAGAGTGTTCAGCAGGCTTGTGCTCT  
GAATACTGCAGCATGGAATAATAGGATAGGACCTTGGTTCATTTTGTGGTTTCTAGGGCTAAGGTAATGATTAATAGG  
GACAAATTTGGGGGATTCGATTTAAGTGTACAGGTTGAAATTTTATAGATTGTTTAAAGACGAACTACTGCGAAGACCT  
GCCAAGGATGTTTTATTAATCAAGAACGACAGTAGGGGGTTGAAAGACGATTAGATACCGTTCGTAATCTCTACCATAAA  
CTATGCCGACTAGAGATAGGAAAATGCCCTTTCTTGGCTTCTCCTGCACCTCATGAGAAAATCAAAGTCTCTGGGTTCTGGG  
GGGAGTATGGTGCAGGCTGAAACTTAAAGGAATFGACGGAAAGGACACCACCAGCGCTGGAGCCTGCGGCTTAATTTGA  
CTCAACACGGGGAAACTACCAGGTCCAGACATGGGAATGATGACAGATTGATAGCTTTTCTGATTTCTATGCGTGGT  
GGTGCATGGCCGTTCTTAGTTGGTGGAGTATCTGCTGGTAAATTCGATAACGACGAGACCTTAGCCTGCTAAATAG  
GGTCAGGAACATCTGTTTCTGTATCACTTCTTAGAGGACTTTGCGTGTCTAACGCAAGGAAGTTTAGGCAATAACAGG  
TCTGTGATGCCCTTAGATGTTCTGGGCTGCACGCGCGCTACACTGATGCATGCAACGAGTTTCAACCTTGGCCGCGAGG  
CTTAGGTAATCTTTTGTAGTATGATCGTGTAGGGATAGATTGCAATTAATTAATCTTCAACGAGGAATGCCATAGTAG  
GCGCAAGTACGACGCTTGGCCGATTACGTCCCTGCCCTTTGTACACACCGCCCGTCCGTGCAACCGATCGGAGGGTCTT  
GTGAACCTATCGGACTGATCAGTTGTGCTTCACTTCTGGTCCGAAAGTTGCGTAAATAGAGCCTCTAAAGGATGCAAAA  
GTCGTAACACGGTT

>GQ352556 - *Trichuris vulpis* isolate D56 clone A 18S ribosomal RNA gene, partial sequence; internal transcribed spacer 1, complete sequence; and 5.8S ribosomal RNA gene, partial sequence

ACGGTGAAGCCGCGAATGGCTCATTAACAGCATTGTTTCGCAAGAACTGATACTCACTTGGATAACTGTGGAAATTTCT  
AGAGCTAATACATGCCTGAAAGCTTCCGCGCGCAATGGCGGAGCGCATTTAATTAGTACAAAACCAATCGGGCTTCGC  
TGACGGCGTTCGCCCCCAACGGTGGTGAATCGAATGACTATGCTGATCGCACGGTCCAGCACCGGCGACGAATCTTT  
GAAATGACTTGTCTATCAACTTTTCGATGTTACGCTACGTGCTTACCATGGTGAACAACGGTTAACGGAGAAATCAGGGTTCG  
ACTCCGGAGAGGGAGCCTGAGAAAACGGCTACCACATCAAGGAAGGCAGCAGGACGCAAAATACCCACTCCAGATCCGG  
GGAGGTAGTGACGAAAAATAACGGAACGTATCTCCATGAGACCGTTACCGGAACACCGAGCGCTACACAAGTCCGGCT  
AATTTCTATTGGAGGGCAAGTCTGGTGCAGCAGCGCGGTAATTCAGCTCCAATAGCGTATATTAAGTTGCTGCGGTT  
AAACCGCTCGTAGTTGGATTTTGGTGAACGACGACGGTCTTAAGCAGGAGTGCCTCCGTCGCTCAGTCACTGTTCAA  
TCAAGCTTGTCTTGTATGCTTGTAGTGTGCTTGGGCGACTTGAAGTTTACTTTGAGAAAAATGGAAGCGCTCAAGG  
CAGGCCGTAGTCTTGAAGTGTGCTGCAATGAAATAATGAAACTTAAAGGAATFGACGGAAAGGACACCACCAGGATCGAG  
GCAATGATTAAGAGACAGACGGGACATTCGATTTGCTGCGTTAGAGGTGAAGTTCTTGGATCGCAGCAAGACGAACA  
ATTTGCGAAAGCAATTTGTCAAGAAATGTTTTCATTAATCAAGAACGAAAGTTAGAGGTTGCAAGGCGATCAGATACCGCCT  
AGTTGTGACCCGTAACAGTGAACACAGGATTCGGCGACGTTCTTCTTATGACTCGCTGAGCAGCTTCCGGGAAACCAA  
AGTTTTTCCGGTTCGGGGGAGTATGGTTGCAAAAGTAAAGCACTTAAAGGAATFGACGGAAAGGACACCACCAGGATCGAG  
CATGCGGCTTAATTTGACTCAACACGGGAAAACCTACCCTCCGAACACTGTGAGGATTGACAGATCAAGAGCTCTTTC  
TTGATTCAGTGGGTAGTGGTGCATGGCCGTTCTTAGTGTGGTGGAGCGATTTGTCTGGCTAATTCGGATAACGAAACGAC  
TCTGGCCTACTAAGTACGCGGGTGTTCATGCTTCTGACGGGGCCGCTGCGGCAACCGCCGGGCGCGCCCTTGGAG  
CAGCAGCGCCGGGCGCTTCTTAGAGGGACAGCGACCTTTTCGCAAGCCGACGAGAAAGAGCAATAACAGGTTCTGT  
GATGCCCTTAGATGTACGGGCTGCACGCTGTACACTGACGGCGTACGCTGCGTTTCGAGCCCGGCTGGCAGGTTG

GGAAATCGGTTGAAACGTTCTCGTGACTGGGACAGGGAATTGCAATTAATTTCCCTCGAACGAGGAATCCCAGTAAGCGC  
GAGTCATCAGCTTGGCGTTGACTACGTCCCTGCCCTTTGTACACACCGCCCGTCTACTACCGATTGGATGATTTAGTGA  
GGCCTTGGACCGATGCCGAGGTATCCGGCCGCGCTGGTTGGACCGGGCGTCCGGAACTGGCCAACCAACCAATCT  
AGAGCTAAGTAAAAGTTCGTAACAAGGTTTCCGTAAGTGAACCTCGGAAGGATCATTATCAGAAGGGAAGAAGTACGAC  
AAGCGCCTGCACCGGGCGCCGCTTAGCGCGACAGCGGGAGCCTGCTGCTCGTGGTGGTCCGCGACGTCCAGGTCCTGC  
CGCCCTGCGGCGGGTGGGCGCGGGCGTTCGACATTGTGCACCGGTACTGCTCCGCTTGGGCTCCTGTGGCGGCAGTGT  
GGATCTGGTGTGCGCAATTAACCTGCTGATCGCAGCTGCTCGCTGCTGGGCGAGACCAGGTTCAAAGAACGGGAGTCCGGCGC  
GCGGCGGTGGCGTCTGTTGCGGCGCCGCGCTCGACGGCTCGTCCGCGGTTGTAAGGCGGAGCCGACCAGCCGACGACAG  
TGTCCGCTCGGCTCCGCAACCAAGAAAAGAGGCTTAGGAAAAGTTCGAAAAAGTGTAGCTTTGAAAAAGAAAAGGAACG  
ACATTCGGAACGGCGGATCACTTGGCTCGTAGGTCGTTGAAGAACGACGTGACACTCGAGAATTGATGTGAATTGCAGAC  
ACACTGAACCTGAATACTTTGAACGCACATTGC

>Ab699092 - *Trichuris trichiura* gene for 18S ribosomal RNA, partial sequence, isolate: Ttl-Macaque  
CAGCAGTTGTTGTTTCGCTAGAACTGATGTCCACTTGGATAACTATGGAATGCTAGAGCTAATACATGCCCTCGAAGCTCA  
GTCGCGCTCTGCGCGCTCGGAGCGCGTATTATTGAACAAAACCAATCGGACGCAGGCTAGCTATTGGTCTGAGTCCGCGAA  
ATGTGGTGAATCGGAATTAACCTGCTGATCGCAGCTGCTGATCGCAGCTGCTGATCGCAGCTGCTGATCGCAGCTGCTG  
TTTCGATGGTACGCTACGTGCTTACCATGGTGACAACGGTTAACGGAGAATCAGGTTCCGGTCCGGAGAGGGAGCCTGA  
GAAACCGCTACCACATCAAGGAAGGCAGCAGGCACGCAAAATACCCACTCCAGATCGGGGAGGTAGTGACAAAAATA  
ACGGAACGTTTCTCATGAGACGCTTACCAGAACGATCGAGCCGTACATAAGTTCGGTAAATCTATTGGAGGGCAAGT  
CTGGTGCCAGCAGCCGCGTAAATTCAGCTCCAATAGCGTATATTAAGTTGCTGCGGTTAAACCGCTCGTAGTTGGATT  
GCGGATGTGACGACGGTCTCCTAAGCAGGAGTCTGCTCCGCTCGTCCACTGTTGATCAAGATTGCCCTGGATGCT  
CTTCAGTGTGCTTGGCGACTTGAAGTTTACTTTGAGAAAAAGAGCGCTCAAGGCAAGCCGCTAGTGTGTTGAAC  
CTGGTGCATGGAATAATGAAAGATGGCTCAGTGTATTTGGTTTACGGCTACGAGGCAATGATTAAGAAAGCAATG  
ACGGGGACATTCTGATTGCTGCGTTAGAGGTGAAATCTTGGATCGCAGCAAGACGACCAATTCGCAAAAGCATTGTCAA  
GAATGTTTTCATTAATCAAGAACGAAAGTTAGAGGTTCCGAAAGCGATCAGATACCGCCCTAGTTGTGACCGTAAACGATG  
CCAACAGCGATTCCGGCGATGTTCTTTTGTGACTCGTGTAGCAGCTTCCGGGAAACCAAGTGTTCGGTCCGGGGGA  
AGTATGGTTGCAAAAGTGAACCTTAAAGGAATTGACGAGGACCCAGGAGTGGAGCATGCGGCTTAAATTTGACTA  
AACACGGGAAACCTACCCGTCGCCAACACTGTGAGGATTGACAGATCAAGAGCTCTTTCTTGATTAGTGGGTAGTGGT  
GCATGGCCGTTCTTAGTTGGTGGAGCGATTTGCTGGCTAATTCGATTAACGAAACGAGACTCTGGCCCTACTAAGTACGCG  
CGGTATTCAGCTCCTCCGCGCAGCCGCGCTGCGCTTCGGCTGAGCAGCTCGTCCGCTTTGCGCGAGCGCTCCGCGG  
AGCACTGTAGTCCCGGACGCCCTTCTAGAGGGACCGACACTTTCGCAAGCCGACGAGAAAGAGCAATAACAGG  
TCTGTGATGCCCTTAGATGTACGGGCTGCACGCGTGTACACTGACGGCGTACGCTGCGTTCAAGCCCGCCTGGCAA  
GGCCAGGAAATCGGTTGAAACGTTCTCGTGACTGGGACAGGGAATTGCAATTAATTTCCCTCGAACGAGGAATTCACGTA  
AGCGGAGTCACTAGCTTGCCTGACTACGCTCCCTGCCCTTTGTACACACCGCCCGTCTACTACCGATTGGATGACTT  
AGTGAGGCCCTTTGGCCGATCCGCGCGCTTCGGCCCTCAGTTGAAACCGCCGCTGGAAAACCTGGCCGAACCAAGCC  
ATCTAGAGGAAGTAAAAGT

>EF514913 - *Angiostrongylus costaricensis* 18S ribosomal RNA gene, partial sequence  
AGGAGTTCAGCTTCAAGTGAACCTGCGAACCGCTCATTAGAGCAGATGTGATTTATTCGGAAAAATCCTATTGGATAACTG  
CGGTAATTTCTGGAGCTAATACATGCGTATAAACCCCTGACTTTTCGAAAGGGTGAATTAATAGAGCAAAATCAATCATTTC  
GGATGCAGTTTGTGACTCTGAATAACGAGCATATCGCGCGCTTGTTCGCTGATAATCCGAAAAAGTGTCTGCCCTATC  
AACCTGATGGTAGTCTATTAGTCTACCATGGTTATTACGGGTAACGGAGAATAAGGGTTCGACTCCGGAGAGGGAGCCTT  
AGAAACCGCTACCACATCAAGGAAGGCAGCAGCGGCAAGCACTTATCCAATCTTGAATAGATGAGATAGTACTGACTAAAT  
AAAAAGACCATTCTATGGAACGGTTATTTCAATGAGTTGATCATAAACCTTTTTTCGAGTATCAAGTGGAGGGCAAGTC  
TGGTGCCAGCAGCCGCGTAATTCAGCTCCACTAGTGTAAATCGTCAATGCTGCGGTTAAAAAGCTCGTAGTTGGATCT  
GAGTTACATGCAATGATTCGCCCTTTGGCGTTAATCATTTGTTGTGACTATTTGCTGGTTTCTATTGAAATCTCGATTCT  
TTAGTGGCTAGCCGATTTTACTTTGAATAAATTAGAGTCTCAGAAACAAGCGTTTGTCTTGAATGGTGCATGGAATAAT  
AAAAGAGGACTTCGGTTCATTTATTGGTTAGGAACGGAAGTAAATGATTAAGAGGGACAATTCGGGGCATTCGTATCC  
CTGCGCGAGAGGTGAAATTCGTTGACCCGAGGGGGACGCCCTAAGCGAAAGCATTTGCCAAGAAATGCTTTCATTAATCA  
AGAACGAAAGTCAAGAGTTCGAAGGCGATTAGATACCGCCCTAGTCTGACCGTAAACTATGCCATCTAGCGATCCGATG  
GGTATTGTTGCTTTCGAGGAGCTTCCCGAAACGAAAGCTTTCCGTTCCGCGGATAGGTTGCGAAAGCTGAAAGT  
CTTAAAGAAATGACGGAATGGCACCACCAGGAGTGGAGCCTGCGGCTTAAATTTGACTCAACACGGGAAACCTACCCGG  
CCCGACACCGTAAGGATGACAGATTGAAAGCTCTTTCTCGATTTGGTGGTTGGTGGTGCATGGCCGTTCTTAGTTGGT  
GGAGCGATTTGTCTGGTTTATTCGATAACGAGCGAGACTCTAGCCTGCTAAATAGTACTAGATTACTGTGCTAGTCT  
ACTTCTTAGAGGGATAAGCGGTGTTTAGCCGACGAGATTGACGCGATAACAGGTCTGTGATGCCCTTAGATGTCGGGGC  
TGCACGCGGCTACAATGGAAGAACTCACTGGCTATCCATTGCCGAAAGGATTTGGTAAACCGTTGAAACTCTCCGTG  
ACCGGGATAGGGAATTTGAAATTAATTTCCCTTGAACGAGGAATTCCTAGTAAGTGTGAGTCACTAGCTCACGCTGATTACG  
TCCCTGCCATTTGATACACCGCCGCTGCTCCGGACTGAGCTGTCTCGAGAGGACTGCGGACTACTGTATTGAGGC  
CTTCGGGTCGCGATATAGCGGAAACAGTTCAATCGCAATGGCTTGAACCGGTTAAAAAGTTCGTAACAAGGTATCTG

>KR063346 - *Angiostrongylus cantonensis* 18S ribosomal RNA gene, partial sequence  
TATTAGAGCAAAATCAATCAATTTTCGGATGTAGTTTGTGACTCTGAATAACGAGCATATCGGCGGCTTGTTCGCGGATA  
ATCCGAAAAAGTGTCTGCGCTATCAACCTGATGGTAGTCTATTAGTCTACCATGGTTATTACGGGTAACGGAGAATAAGG  
GTTTCGACTCCGGAGAGGGAGCCTTAGAAACGGCTACCACATCAAGGAAGGCAGCAGGCGGAAACTTATCCAATCTTGA  
ATAGATGAGATAGTACTGACTAAAAATAAAAAGACCATTCTATGGAACGGTTATTTCATGAGTTGATCATAAACCTTTTTT  
CGAGTATCCAGTGGAGGGCAAGTCTGGTGCAGCAGCCGCGTAAATTCAGCTCCACTAGTGTAAATCGTCAATTTGCTGCG  
GTTAAAAAGCTCTGATTTGGATTGAGTTGCAATGCAATGCAATGCTGCTTGGGCTTAAATCAATTTGTGACTATTGCTGG  
TTTTCTATTGAAATTTGATTTCTTTAGTGGCTAGCGAGTTTACTTTGAATAAATTAGAGTGTCTCAGAAACAAGCGTTTGC  
TTGAATGGTGCATGGAATAAATAAAGAGGACTTCCGTTCTATTTATTTGTTTCAGGAACTGAAGTAAATGATTAAGAGG  
GACAATTCGGGGGCTTCGATCCCTGCGGAGAGGTTGAAATTCGTTGACCGCAGGGGGACGCCCTAAAGCGAAAGCATT  
TGCCAAAGATGCTCTCAATTAATCAAGAACGAAAGTCAAGGATTCGAAAGGCGATTAGATACCCGCTAGTTCTGACCGTA  
AACTATGCCATCTAGCGATCCGATGGGGTATTGTTGCCCTTGTGAGGAGC

>DQ464371 - *Ancylostoma ceylanicum* 18S ribosomal RNA gene, partial sequence  
TCGAAAGGGTGCAATTAATAGAGCAAAATCAATCACCTTCGGGTGATGTTGCTGACTTAAATAACGCTGCATATCGGGC  
GCTTGTCCGCGGATATTCCGAAAAAGTGTCTGCCCTATCAACCTGATGGTAGTCTATTAGTCTACCATGGTTATTACGGG  
TAACGGAGAATAAGGGTTCGACTCCGGAGAGGGAGCCTTAGAAACGGCTACCACATCAAGGAAGGCAGCAGGCGCGTAA

CTTATCCACTCTTGAAGAGATGAGATAGTGACTAAAAATAAAAAGACCATTCTATGGAACGGTCATTTCATGAGTTGA  
TCATAAACCTCTTTTCGAGGATAAAGTGGAGGGCAAGTCTGGTGCCAGCAGCCGGGTAATCCAGCTCCACTAGTGTAA  
ATCGTCAATGCTCGCGTTAAAAAGCTCGTAGTTGGATCTGAGTCGCATGCAGTGGTTTCGCTTTGGCGTTAATCGCTGTT  
CGCGCTATTTGCTGGTTTTCTACTGAAGTTTCGGCTTCTTTAGTGCGTAGCGAGTTTACTTTGAATAAATTAG  
>DQ503458 - *Thelazia lacrymalis* 18S ribosomal RNA gene, partial sequence  
AGCCATGCATGTCTAAGTTCAAATAACCTAAAAATGGTGAACCCGGAACGGCTCATTATAACAGCTATAATGTACTTGAT  
GTTGATTTTCAACAGTGGATAAAGTGGCAATCTAGAGCTAATACATGCACCAAAGCTCAAACCTACGGATGAGCGCA  
TCTATTAGAATGAAAAACCAATGGGGTTTATGCAATAAGCTCGCAAAAAAAAAAATGGTGAATCTGAATAGCTATAGC  
TGATCGCATGGTCTGTACCGGCGACGATCTCACAAGTGTCTGCCTTATCAACTTTCGATGGTAGTTTATGTGCCTACC  
ATGGTTGTAACGGGTAACGGAGAATAAGGGTTCGACTCCGAGAGGGAGCCTGAGAAACGGCTACCACATCCAAGGAAGG  
CAGCAGGCGCGCAAATTACCCACTCTCGCATGAGGAGTAGTGACGAAAAATAACGAGACCGTCTCTTTGAGGCCGGT  
TATCGGAATGGGTACAATTTAAACCTGTAAACGAGGATCTATGAGAGGGCAAGTCTGGTGCCAGCAGCCGGTAATTC  
AGCTCTCAAAGTGTATATCGTCAATTGCTGCGGTAAAAAGCTCGTAGTTGGATCTGCGTCTTAGGTGTGGTCTATTCAA  
ATAGAATATGAACATAAACCTAGACTAATTAATAGCTAGGTTTTATTATATGTACCTTAACTGGTTGCATATAATGGCC  
GGCATGTTTACCTTGAATAAATAGAGTGTAAAGCGGGCTTAAAAAGCTTGAATAATTTGTCATGGAATAATGAAATA  
GGATCTTGATTGTTGATGCCTATTTTTATTGGTTTTGTAAACATTTTGTACAAATTGAGATAATGGTTAAGAGGGACGGAC  
GGGGGATTCGATCGCTGCGTGTAGAGGTGAAATTCCTGGACCGTAGCGAGAGCCCAACTGCGAAAGCATTTGCCAAGA  
ATGTTCTTCAATAATCAAGAACGAAAGTCAAGGTTTCGAAGCGGATCAGATACCGCCCTAGTTCTGACCGTAACGATACC  
AACTAGCGTTCCTTGGCGGTAATACGCTTGTACGGGAGCCTTCCGGAACGAAAGTTTTTCGGTTCCGGGGGAAATA  
TGTTGCAAGGCTGAAACTTAAAGAAATGACGGAAGGGCACCACCAGAGTGGAGCCTGCGGCTTAAATTTGACTCAACA  
CGGGAACCTCACCTGGCCGGACACCGTGTAGGATTGACAGATTGAAAGCTCTTTTCATGATTCCGGTGGTGGTGGTGCAT  
GGCGTTCCTAGTTGGTGGAGTATTTGCTGGTTTATTTCCGATAACGAGCGAGACTTAGCCTAAATAGTTTATGCT  
TGGATAAATGTATGAGTAATACGCTAGTCCAGACAACCTTCTTAGAGGGACAAGCGGTGTTAGCCGCATGAAGTTGAGCA  
ATAACAGGTCTGTGATGCCTTAGATGTCCAGGCTGCACGCGCTACACTGGAGGAATCAGCGTGTGTAACCATTTGC  
TGAAAAGTTATGGTAACCCCTGAAAATCCTCCGTGATCCGGATCGGGAATTGCAATTTATTTCCCTGAAACGAGGAATTC  
CTAGTAAGTGTAGTCACTGAGTGTGAGTGTGAGTGTGAGTGTGAGTGTGAGTGTGAGTGTGAGTGTGAGTGTGAGTGTGAG  
CCGTTTTGAGAAAAGCGGGGACTGCTGTTTTCAAAACCTTCAATTTATGATAAGGTGGAGATTTTGGTGGAAACCGCTT  
TAATCGCAGTGGCTTGAACCGGGCAAAAGTCTAACAAGGTTTCCGTAGGTGAACCTGCCAGAAGGATCAA  
>JN256973 - *Toxocara cati* isolate Pbl 18S ribosomal RNA gene, partial sequence  
AGCCATGCATGTCTAAGTTCAAATGGCCTTAAAGGTGAAACCGCAACCGCTCATTATAACAGCTATATATACTTGAT  
CTTGATGCTCTACGTGGATAACTGTGGTAATTCAGAGCTAATACATGCACCAAAGCTCCGATTTTCTGACGAGCGCATC  
TATTAGATTAACCAAACTCGGGTTTCGGCCCGTAAATTTGGTACTCTGAATAACTGTAGTGTGATCGCATGGTCCGAAC  
GGCAGCTGTCTATCAAGTGTCTGCCTTATCAACTGTCTGATGGTAGTTTATGTGCCTACCATGGTTGTACCGGTAACGG  
AGAATAAGGGTTCGACTCCGAGAGGGAGCCTGAGAAACGGCTACCACATCCAAGGAAGGCAGCAGGCGCAAATTAACC  
CACTCTCGCATGAGGAGGTAGTGACGAAAAATAACGAGACCGTCTCTATGAGGCCGGTATCGGAATGGGTACAATTT  
AAACCCGTTAACGAGGATCTATGAGAGGGCAAGTCTGGTGCCAGCAGCCGGTAATTCAGCTCTCAAAGTGTATATCG  
TCATTGCTGCGGTTAAAAAGCTGTAGTTGGATCTGCGCTCAGGACTTGGTCCGCCACTGGGCGAGAATGGGCTCCT  
GGCTAGTTCTGCTGGTTTTCCCTACGTTGCCCTTATCGGTCGCGTAGGGTGGCTAGCGAGTTTACTTTGAAAAAATTAG  
AGTGTTCACGCGGGCTTATGTCTGAATACTCGTGCATGGAATAATAGAATAGGATCTCGGTTCTATTTGTTGGTTTTTC  
TGATCTGAGATAATGGTTAAGAGGGACGGACGGGGGCATTCGTATCGTGCCTGAGAGGTGAAATTCCTGGACCGTAGCG  
AGACTCCGACTCGAAAGCATTTGCCAAGAATGTCTTCAATAACAAGAACGAAAGTCAAGAGGTTCGAAGGGCATCAGA  
TACCGCCCTAGTTCTGACCGTAAACGATACCAACTAGCGTTCCGTCGGCGGTAATACGCCTTGACGGGCAGCTTCCCGG  
AAACGAAAGTCTTTCGGTTCCGGGGGAAGTATGGTTGCAAAGCTGAAACTTAAAGAAATTGACGGAAGGGCACCACCAGG  
AGTGGAGCCTGCGGCTTAAATTTGACTCAACACGGGAAACTCACCTGGCCCGGACACCGTGAGGATTGACAGATTGAGAG  
CTCTTTCTTGATTCGGTGGTGGTGGTGCATGGCCGTTCTTAGTTGGTGGAGTGATTTGTCTGTTTATCCGATAACGA  
GCGAGACTCTAGCTACTAAATAGTCACTCGGATAAACAAGTCCGGAAGACTTCTTAGAGGGACAAGCGGTGTTACGCCG  
ATGAAGTTGAGCAATAACAGGTCTGTGATGCCCTTAGATGTCCAGGGTGCACGCGCCTACACTGGAGGAATCAGCGTG  
CTGTAACCATTTGCCGAAAGGATTTGGTAACCCCTGAAAATCCTCCGTGATCGGGATCGGGAATTGCAATTTATTTCCCTT  
GAACGGAATTTCCAGTAAAGTGTGAGTCACTGAGTCACTGAGTCACTGAGTCACTGAGTCACTGAGTCACTGAGTCACTGAG  
GCCCGGACTGAGCCGTTTCGAGAAAAGCGGGGACTGCTGTTTTGAGACCTTCCGAGGTGGAGATTTTGGTGGAAACC  
GCCTTAATCGCAGTGGCTTGAACCG  
>JN256977 - *Toxocara canis* isolate Al2 18S ribosomal RNA gene, partial sequence  
AGCCATGCATGTCTAAGTTCAAATGGCCTATAAAGGTGAAACCGCAACCGCTCATTACAACAGCTATATATACTTGAT  
CTTGATGCTCTACGTGGATAACTGTGGTAATTCAGAGCTAATACATGCACCAAAGCTCAGATTTTCTGACGAGCGCATT  
TATTAGATTAACCAAACTCGGGTTTCGGCCCGTCAATTTGGTACTCTGAATAACTATTGCTGTGATCGCATGGTCTCGAAC  
GGCAGCTGTCTATCAAGTGTCTGCCTTATCAACTGTCTGATGGTAGTTTATGTGCCTACCATGGTTGTACCGGTAACGG  
AGAATAAGGGTTCGACTCCGAGAGGGAGCCTGAGAAACGGCTACCACATCCAAGGAAGGCAGCAGGCGCGCAAATTAACC  
CACTCTCGCATGAGGAGGTAGTGACGAAAAATAACGAGACCGTCTCTATGAGGCCGGTATCGGAATGGGTACAATTT  
AAACCCGTTAACGAGGATCTATGAGAGGGCAAGTCTGGTGCCAGCAGCCGGTAATTCAGCTCTCAAAGTGTATATCG  
TCATTGCTGCGGTTAAAAAGCTGTAGTTGGATCTGCGCTCAGGACTTGGTCCGCCACTGGGCGAGAATGGGCTCCT  
GGGCTAGTTCTGCTGGTTTTCCCTACGTTGCCCTTATCGGTCGCGTAGGGTGGCTAGCGAGTTTACTTTGAAAAAATTAG  
AGTGTTCACGCGGGCTTATGTCTGAATACTCGTGCATGGAATAATAGAATAGGATCTCGGTTCTATTTGTTGGTTTTTC  
TGATCTGAGATAATGGTTAAGAGGGACGGACGGGGGCATTCGTATCGTGCCTGAGAGGTGAAATTCCTGGACCGTAGCG  
AGACTCCGACTCGAAAGCATTTGCCAAGAATGTCTTCAATAACAAGAACGAAAGTCAAGAGGTTCGAAGGGCATCAGA  
TACCGCCCTAGTTCTGACCGTAAACGATACCAACTAGCGTTCCGTCGGCGGTAATACGCCTTGACGGGCAGCTTCCCGG  
AAACGAAAGTCTTTCGGTTCCGGGGGAAGTATGGTTGCAAAGCTGAAACTTAAAGAAATTGACGGAAGGGCACCACCAGG  
AGTGGAGCCTGCGGCTTAAATTTGACTCAACACGGGAAACTCACCTGGCCCGGACACCGTGAGGATTGACAGATTGAGAG  
CTCTTTCTTGATTCGGTGGTGGTGGTGCATGGCCGTTCTTAGTTGGTGGAGTGATTTGTCTGTTTATCCGATAACGA  
GCGAGACTCTAGCTACTAAATAGTCACTCGGATAAACAAGTCCGGAAGACTTCTTAGAGGGACAAGCGGTATTCAGCCG  
ATGAAGTTGAGCAATAACAGGTCTGTGATGCCCTTAGATGTCCAGGGTGCACGCGCCTACACTGGAGGAATCAGCGTG  
CTGTAACCATTTGCCGAAAGGATTTGGTAACCCCTGAAAATCCTCCGTGATCGGGATCGGGAATTGCAATTTATTTCCCTT  
GAACGGAATTTCCAGTAAAGTGTGAGTCACTGAGTCACTGAGTCACTGAGTCACTGAGTCACTGAGTCACTGAGTCACTGAG  
GCCCGGACTGAGCCGTTTCGAGAAAAGCGGGGACTGCTGTTTTGAGACCTTCCGAGGTGGAGATTTTGGTGGAAACC

GCCTTAATCGCAGTGGCTGAACCG

>KM079654 - *Ascaris suum* isolate PUG-8.2 18S ribosomal RNA gene, partial sequence  
 ATGGCCTATAAAGGTGAAACCGCGAACGGCTCATTACAACAGCTATTATATACTTGATCTTGATATCCTACGTGGATAAC  
 TGTGGTAATTCTAGAGCTAAATACATGCACCAAAGCTCCGATTTTCTGACGAGCGCATCTATTAGATTAACAACCAATCGGG  
 TTTCGGCCCGTCAATTGGTGACTCTGAATAACTATAGCTGATCGCATGGTCTCGAACCGGCGACGTGTCTATCAAGTGTC  
 TGCCCTTATCAACTGTGCGATGGTAGTTTATGTGCCTACCATTGGTTGTAACGGGTAACGGGAGAATAAGGGTTGCGACTCCGGA  
 GAGGGAGCTTGAAAACCGCTACCCACATCCAAGGAAGGCAGCAGGCGCGCAAATACCCTACTTCGGCATGAGGAGGTAG  
 TGACGAAAAATAACGAGACCGTTCTCTATGAGGCGGGTTATCGGAATGGGTACAATTTAAACCGTTAACGAGGATCTAT  
 GAGAGGGCAAGTCTGGTGCCAGCAGCCGCGTAATCCAGCTCTCAAAGTGTAT

>KM079641 - *Ascaris lumbricoides* isolate HUG-3.1 18S ribosomal RNA gene, partial sequence  
 ATGGCCTATAAAGGTGAAACCGCGAACGGCTCATTACAACAGCTATTATATACTTGATCTTGATATCCTACGTGGATAAC  
 TGTGGTAATTCTAGAGCTAAATACATGCACCAAAGCTCCGATTTTCTGACGAGCGCATCTATTAGATTAACAACCAATCGGG  
 TTTCGGCCCGTCAATTGGTGACTCTGAATAACTATAGCTGATCGCATGGTCTCGAACCGGCGACGTGTCTATCAAGTGTC  
 TGCCCTTATCAACTGTGCGATGGTAGTTTATGTGCCTACCATTGGTTGTAACGGGTAACGGGAGAATAAGGGTTGCGACTCCGGA  
 GAGGGAGCTTGAAAACCGCTACCCACATCCAAGGAAGGCAGCAGGCGCGCAAATACCCTACTTCGGCATGAGGAGGTAG  
 TGACGAAAAATAACGAGACCGTTCTCTATGAGGCGGGTTATCGGAATGGGTACAATTTAAACCGTTAACGAGGATCTAT  
 GAGAGGGCAAGTCTGGTGCCAGCAGCCGCGTAATCCAGCTCTCAAAGTGTAT

>Z11590 - *S. japonicum* small subunit ribosomal RNA gene (partial)  
 TCTAGAGCTAATACATGCCTTGAATCCCTGACCCGCAAGGGGACRGGTGCATTTATTAGAACGAAACCAACCGGGTGC  
 CTTATGCTGTGCCCTGTACATTTCTGTGATGACTCTGGATAACTTTACTGATCGCAGTCGGCCTTGTGTGTCGGGACGGA  
 TCTTTCAAATGTCTGCCCTATCAATTTGTGGTAGGTGATTTGCCCTACCATGATGATAACGGGTAACGGGGAATCAGGGT  
 TCGATTCGGGAGAGGGAGCTGAGAAATGGCTACCACATCCAAGGACGGCAGGCGCGAAAATACCCTACTCCACGCA  
 CGGGGAGGTAGTGACGAAAAATACGGATACGGGACTCAATTGAGGCTCCGTAATTCGAATGAGTACAATTTAAATCCTTT  
 AACGAGGACCAATTTGAGGGCAAGTCTGGTGCCAGCAGCCGCGTAATCCAGCTCCAAAAGCGTATATTAAGTTGCTG  
 CAGTTAAAAGCTCGTAGTTGGATCTGGGTAGTGCGATCGCATGTCTGTGCTTGTTCACGGTCTTGGTTACGATCAGGG  
 AGTGGTCAGCTCGCCGTAGTGGTGTGTCACCTTTGAGCAGTCTGTGTTWTATTAACAGGTGTCGATGGGTTAATGA  
 GTATTGTATCTTATTGACCTGTTGGCATGCTTTCCGATGCCTTTAAACGGGTGTCGGGGGGGACGGCATCTTTACTTTG  
 AACAAATTTGAGTGCTCAAGCAGGCTTATGCCCTGAAAATTTCTGCATGGAATAATGAAAATAGGACTTCGGTTCTATT  
 TTGTTGGTTTTCCGATCCGAAGTAATGGTTAAGAGGGACAGACGGGGGCAATTTGTATGGCGGTGTAGAGGTGAAATCT  
 GGGATCCGCCAGACAACTACAGCGAAAGCATTTGCCAAGAATGTTTTCATGATCAGGAGCGAAAGTCAAGATTGCTCG  
 AAGACGATCAGATACCGTCTGATTTCTGACCATAAACGATGCCAACTGACGATCCGCGTTGGTCTATAATTGACATCGC  
 GGGCAGTCCCGGGAAACCTTTAAGTCTTTGGGCTCCGGGGGAGTATGGTTGCCAAAGCTGAACTTAAAGGAATTGACG  
 GAAGGACACCAGGAGTGGAGCTGCGGTTAATTCGACTCAACACGGGAAACTACCCGGCCCGGACACTGTGAGG  
 ATTGACAGATTGAAAGCTTTTCTTGATTCGGTGGTGGTGGTGCATGGCCGTTCTTAGTTGGTGGAGCGATTGTCTGG  
 TTAATCCGATAACGAACGAGACTTTAACTACTAAATAGTAGACTGGTCTCTGTGCTCGTTACGGGCGGGCTTCTAC  
 TGCTTCTTTATGAGTAGTGTGCTGATCCGGCGGGTGGCTGCCAGTTTCTTACTTCTTAGAGGGACAAGCGGCACAC  
 TTAAGTCGACGAAATTTAGCAATAACAGGCTCTGTGATGCCCTTAGATGTCCGGGGCACACACTGCGGTACAATGAGG  
 GCCAGCGAGCTTGGAACTTGGCCGAAAGGGTTGGGAAACCTGTTTTCATCACCCTCGTGACTGGGATCGGGCTTGCA  
 TTATTCGCCGTGAAAGGAAATTCCTGTAAGTCAAGTCATAAGCT

>DQ354363 - *Schistosoma intercalatum* strain NHM3397 18S ribosomal RNA gene, partial sequence  
 GCTCATTAAATCAGCTATGGTTCCTTAGATCGTAAATGCTACATGGATAAAGTCTAGTAAATTCAGAGCTAATACATGCCT  
 TGAATCCCTGACCCGCAAGGGAACGGGTGCATTTATTAGAACGAAACCAATCGGGCGGGCTTCGGCTGTGCCCTGTTACA  
 TTCTGTGATGACTCTGGATAACTTTACTGATCGCAGTCGGCCTTGTGTGCGGCACGGATCTTTCAAATGTCTGCCCTATC  
 AATTTGTTGGTAGGTGATTTGCCCTACCATGATGATAACGGGTAACGGGGAATCAGGGTTGATTCGGGAGAGGGAGCCTG  
 AGAAATGGCTACACATCCAAGGACGGCAGCAGGCGGCAAAATACCCTACTCCGGCACGGGAGGTAGTGACGAAAAAT  
 ACGGATACGGGACTCAATTGAGGCTCCGTAATTCGAATGAGTACAATTTAAATCCTTTAACGAGGACCAATTGGAGGGCA  
 AGTCTGGTGCCAGCAGCCGCGTAAATCCAGCTCCAAAAGCGTATATTAAGTTGCTGAGTTAAAAGCTCGTAGTTGG  
 ATCTGGGTGCTGCGGTCGATGCCGTGCTTGTTCACGGTTTGGTTACAATCAGGACGTGTTACGCTCGGTGTAGTGGC  
 TGTGACGCTTTTCAAGCTGCTGTGTTAAACGGGTGCTGGTGGTGGTGGTGGTGGTGGTGGTGGTGGTGGTGGTGGTGGT  
 TCCGGATGCCCTTTAAACGGGTGTCGGGAGCGGACGGCATCTTTACTTTGAACAAATTTGAGTGTCAAAGCAGGCTGTG  
 CGCTGAAAATTTCTGATGGAATAATGAAATAGGACTTCGGTCTATTTTGTGGTTTTCCGATCCGAAGTAATGGTTA  
 AGAGGACAGACGGGGCATTGTTATGGCGGTGTTAGAGGTGAAATTCGGGATCCGCCAGACAACTACAGCGAAAG  
 CATTTGCCAAGAATGTTTTTCATTGATCAGGAGCGAAAGTCAAGATTTCAAGACGATCAGATACCGTCTGATTTCTGACC  
 ATAACAATGCCGACTGATGATCCGCTGGTTCTATAATTGACATCGCGGCAGTCCCGGGAAACCTTTAAGTCTTTG  
 GGCTCCGGGGGAGTATGGTTGCAAAGCTGAACTTAAAGGAATTGACGGAAGGGCACCAGGAGTGGAGCCTGCCGT  
 TTAATTCGACTCAACACGGGAAACTCACCGGCCGGACACTGTGAGGATTGACAGATTGATAGCTTTCTTTGATTTCG  
 GTGGGTGGTGGTGCATGGCCGTTCTTAGTTGGTGGAGCGATTGTTCTGGTTAATTCGATAACGAACGAGACTTTAACCT  
 GCTAAATAGTAGACTGGTCTCTGTGCTGTTTTAGGGCGGGCTTCTATTTGCTTTTATGGAGTAGTGTGGTGGTGTGATC  
 CGCGGGTGGCGGTGCCAGTTTTTACTTCTTAGAGGACAAGCGGCACACTTAAGTCGACGAAATGAGCAATAACAGGT  
 CTGTGATGCCCTTAGATGTCGGGGCCACAGCTGCGCTACAATGACGGTGCCAGCGAGTCTGGGAACCTGGCCCGAAAGG  
 GTTGGGCAAACTGTTTCAATCACCCTGCTGACTGGGATCGGGCTTGAATTTCCCGTGAACGAGGAAATCCTGGTAA  
 GTGCAAGTCATAAGCTTGGCTGATACGCTCCCTGCCCCTTTGTACACACCGCCGCTGCTACTACCGATTGAATGGTTTA  
 GTGAGGTCGTTGGATTGGTGTGTTGTAGTGCCGTTGCCGCTCGACTGATGCTGAGAAGATGACCTAATTTGACTATTTA  
 GAGGAAGTAAAAGTC

>AB731643 - *Dipylidium caninum* gene for 18S rRNA, partial sequence, sample code: Dcan  
 CTATGGTTTATTGGATCTTACCCTGTAATGGATAACTGTAATAACTTAGAGCTAATACATGCCTCGATGCCCTGACCG  
 CGCTGACCGCTTGGCGGCTCTCGACTGCCGGCTGGACGGCGGGATGGGTGCACTTATTAGATCAGAAGCCAACCGA  
 CTCGCTGCATGCCGCTTGGAGTGGTCCGCGGGTTGAGGCACTTCTGGTACTCTGGATAATTGTTACAGATCCGAG  
 TTGGCCGTGTGTCGGCAGCGATCCTTCAAATGTCTGCCCTATCAACTTTCGATGGTAGGTGACCTGCCTACCATGGTGA  
 TAACGGGTAACGGGGAATCAGGGTTCGATTCCGGAGAGGGAGCCTGAGAAACGGCTACCCTTCAAAGGGAGGCAGCAGG  
 CGCGCAAATACCCTCCAGCAGGGGAGGTGGTGACGAAAAATACCGATGCGGGACTCCTTAAAGAGGCTCCGTAAT  
 CGGAATGAGTGGACTTAAAGCTTTCACGAGGATCAATTTGGAGGGCAAGTCTGGTGCAGCAGCCGCGGTAACCTCAGC  
 TCCAATAGCGTATATTAAGTTGCTGACGTTAAAAGCTCGTAGTTGGATCTCGGTTGCATTTGCTGCCCTCCGGTACTTTG



GGCGGCTGGTGTGTGGCCTACGGTGCACGTAGTGGTGTGCTGCGCCGGCCGCTCTGTCTGTTCCGCTGTTTCGTTGGCT  
CGCCTTGTGCTGATCGCCTGATCGCCCGCCGTTATGAGGTGCGCGTACTGCGTGCAGGAGTGTGCGCTGGCGGTCTGT  
GTTCCCGCATCGGTGGCCTCTTCGCGTGGCCATTGTGTGCTTGGCGTGTGACGGTGTGACGATTTGGCGGTGTG  
GCGAGCGCGCCAGCGGGGCAATTTGGTGGTGGCGGCTGTGGCGGTGTGCGGGCCATTAATTAGCACTGTGCGGT  
CAAGCTGGGGGTCGGCGGTGCCACCTTTGAGCCATGTCTGTGGCCTCACGGTCGCAGGTGTGGCGGGTGTGCGGATAGG  
GCCTGCATACGCTGTGGGGCCTGTGCGCCGCTGTGCATGCCTTTGGATGCCCTTCAAAAAGGTGTCTGTGGCGGATGGC  
ACGTTTACTTTGAACAAATTTGAGTGCCTCAAATCAGGCCGAGGTGCCCTGAAAAGTTTGCATGGAATAATGGAATAGGA  
CTTCGGTCTATTTTCGTTGGTTTTTCGGATCCGAAGTAATGATCAATAGAGACAGGCGGGGACGTTTGTATGGCTGCGCTA  
GAGGTGAAATTCATGGACCGTAGCCAGACAGACTAAAGCGAAAGCATTGTCGTCAGCATGTTTTTCATTGGCCATGAGCGAA  
AGTCAGAGGCTCGAAGACGATCAGATACCGTCTAGTCTGACCATAAACGATGCCAACTGACGATCCGTGGTGGTAGTG  
CAGAAGCAACCTTCCCCACGGGAGTCCCGGGAAACCTTAAGTCTTTGGGTTCCGGGGAAAGTATGGTTGCAAAAGCTG  
AACTTAAAGGAATTGACGGAAGGGCACCACCAGGAGTGGAGCCTGCGGCTTAATTTGACTCAACACGGGAAAACCTACC  
CGGGCCGACACTATGAGGATTGACAGATTGATGGCTCTTTCTTGATTGGTGGTGGTGGTGCATGGCCGTTCTTAGTT  
GGTGGAGCGATTTGTCTGGTAAATTCGGATAACGAACGAGACTCCAACCTGCTAATTAAGTGGCTTTGTCCACTGCCTCTG  
TGATGGCCGTGCTGACGAGGCTGCTGCTGGCGGTGATGCGTCTCCATGTCCTCGTCTCTCTCCCTCCTCCTCCTCCT  
CCTCCTCCTCGGCTCCTTCTCCGCTCCTCCGCTCCTTCGGATGGATGGGTGGACGGATGGATGGATGGATGGATGGA  
TGGATGGTGGGTGGGTGGCGGTTGGCGGATGGACGTTGGTGGTGGTGGTGGTGGTGGTGGTGGTGGTGGTGGTGGTGGT  
ACCGGTGCGGCGCAATGCTACTTCTTAGAGGGACAAGCGGGAGAAGCCGCACGAAATAGAGCAATAACAGGTCTGTG  
ATGCCCTTAGATCTCCGGGGCCGACGCGCGTACATTGACGGTCCAGCGAGTGAGACCTTTGCGCTGAGAGGGCTGG  
GTAACCTGGTCAATCACCCTCAGACAGGGATCGGGGTTGGAAATGTCCCGGTGAACGAGGAATTCCTAGTAAAGTGA  
AGTCATAAGCTTGCCTGATTACGTCCTGCCCCTTTGTACACACCGCCGTCGCTACTACCGATTGAATGGTTTAGTAA  
GTCCTTGGATCGGTGCCATTGTGACGCTCGCCGAGAGGGGATCGTCCGGCAGGCGCTGAGAAGACGCCGAACCTGATCA  
TTTAGA

>Z96946 - *Gnathostoma binucleatum* 18S ribosomal RNA  
TCTCCGATTGATCTGTGTCGGCGATTATATGCTTGTCTCAAAGGTTAAGCCATGCATGTCTGCGTGCCTACTCTTGAAAAG  
TGAACCCGGAATGGCTCATTACGACAGCTATGATTTACTTGATCTTGTATATTCTACTTGGATATCTGTGGTAATCTAG  
AGCTAATACATGCACCAAAGCTCCGACTCTGTGACGAGCGCATTTATTAGAACAAAACCAATCGAGCTTCGGCTCGGTTG  
TTGGTGAATCTGAATAACTACGCTGATCGCACGGTCTCGTACCGGCACATGTCATCAAGTATCTGCCTTATCAACTT  
TCGATGGTAGGTTATGTGCTACCATGGTTGTAACGGGTAACGGAGAATAAGGGTTCGACTCCGGAGAGGGAGCCTGAGA  
AACGGCTACCACATCCAAGGAAGGCAGCAGGCGCAATTAACCCACTCTCGCATGAGGAGGTAGTGACGAAAAATAAC  
GAAACCGATCTCAATGAGGCCGTTATCGGAATGAGTCACGCTTAAACCTCTAACGAGGATCTATGAGAGGGCAAGTCT  
GGTGCCAGCAGCCGCGTAATTCAGCTCTCAAAGTGTATATCGTCATGTTGCGGTTAAAAAGCTCGTAGTTGGATCTG  
CGCTGAGGACTCGGTCCGCTCCTGAGGCTGAACTGAGCTCCTAGGCAGTTTGTGCTGGTTTTCCCTTCGTTGCCTTAAC  
TGGTAGCGTCCGGTGGCTAGCGAGCTTACTTTGAAAAAATTAGAGTGTCTCAAACAGGTTTATGCCTGTATAGCCGTGCA  
TGGAATAATGGAATAGGATCTCGGTTCTATTTTGTGGTTTCTGAACCGAGATAATGGTTAAGAGGGACAAGACGGGGC  
ATTCGTATCGCTGCGTGAGAGGTGAAATTTCTTGACCGTAGCGAGACGCCGACTGCGAAAGCATTGCAAGAAATGTCT  
TCATTAATCAAGAACGAAAGTCAGAGGTTGCAAGGCGATCAGATACCGCCCTAGTCTGACCGTAAACTATGCCAATAG  
CGATCCGTCGCGTAATACGCTTGACGGGAGCTTCCCGGAAACGAAAGTCTTCCGGTTCCGGGGAAAGTATGGTTGC  
AAAGCTGAACTTAAAGAAATGACGGAAGGGCACCACAGGAGTGGAGCCTGCGGCTTAATTTGACTCAACACGGGAAA  
ACTCACCTGGCCCGGACACCGGAGGATGACAGATTGATAGCTCTTCTTGATTCGGTGGATGGTGGTGCATGGCCGTT  
CTTAGTTGGTGGAGTGAATTTGTCTGGTTTATTCCGATAACGAGCGAGACTCTAGCCTATTAATAGATATCGGATTGACG  
CGTCCGTTATACTTCTTAGAGGAACAAGCGGTGCTCAACCGCACGAAATGAGCAATAACAGGTCTGTGATGCCCTTGG  
TGTCCAGGCTGCACGCGCTACACTGGAAGAATCAACGTGCGTAACCATTTGCCGAAACGATTTGGTAACACGTAAC  
AATCTTCCGTGATCGGAATCGGGAATGCAATTTGTTCCCTTGAACGAGGAATTCAGTAAGTGTGAGTCAATCAGCTCG  
CGTTGATTACGTCCTGCCCTTTGTACACACCCCGTCTGCGGACTGAGCCGTTTCGAGAAATGCGGGGATCAT  
TGTTTCGAAAGTCTTCGGGACGAGACTCTTGGTGAAGACCGCTTAATCGCAGTGGCTTGAACCGGGTAAAAGTCGTAAC  
AAGGTATCTGTAGGTGAACCTGCAGATGGATCATCG
